# Supplementary material for: Electroreduction cross-coupling of thiosulfonates with (hetero)aryl boronic acids to access thioethers
Source: Royal Society of Chemistry journal article supplement (doi:10.1039/d5cc05687j), 2025-12-01
Supplement: d5cc05687j1.pdf [file d5cc05687j1.pdf]

## **Electroreduction cross-coupling of thiosulfonates with (hetero)aryl boronic acids to access thioethers**

Yaqin Zhou,<sup>a</sup> Jiang Lei,<sup>b</sup> Meimei Chen,<sup>a</sup> Chi Zhang,<sup>a</sup> Zhiheng Zhao,<sup>a</sup> Lijun Gu,<sup>\*a</sup>

<sup>a</sup> State Key Laboratory of Green Pesticide, Key Laboratory of Green Pesticide and Agricultural Bioengineering, Ministry of Education, Center for R&D of Fine Chemicals of Guizhou University, Guiyang, Guizhou, 550025, P. R. China.

<sup>b</sup> Zhejiang Apeloa Jiayuan Pharmaceutical Co. Ltd., Zhejiang, Dongyang, 322118, P. R. China.

E-mail: gulijun2005@126.com.

# Supporting Information

## List of Contents

|                                                                                             |            |
|---------------------------------------------------------------------------------------------|------------|
| <b>1. Materials and equipment .....</b>                                                     | <b>S1</b>  |
| <b>2. Experimental procedure.....</b>                                                       | <b>S1</b>  |
| 2.1 General procedure for the synthesis of <b>3</b> .....                                   | S1         |
| 2.2 Experimental procedure for the synthesis of <b>3as</b> .....                            | S2         |
| 2.3 Experimental procedure for the synthesis of <b>3au</b> .....                            | S3         |
| 2.4 Scale-up reaction procedure .....                                                       | S3         |
| 2.5 General procedure for the synthesis of intermediate .....                               | S4         |
| <b>3. Optimization of reaction.....</b>                                                     | <b>S5</b>  |
| <b>4. Cyclic voltammetry experiments .....</b>                                              | <b>S7</b>  |
| <b>5. Analysis of by-product.....</b>                                                       | <b>S9</b>  |
| 5.1 High-resolution mass spectra of disulfide .....                                         | S9         |
| 5.2 GC-mass spectra of naphthalene .....                                                    | S9         |
| <b>6. Radical trapping experiments.....</b>                                                 | <b>S10</b> |
| <b>7. Characterization data of products .....</b>                                           | <b>S12</b> |
| <b>8. References.....</b>                                                                   | <b>S28</b> |
| <b>9. Copies of <sup>1</sup>H NMR, <sup>13</sup>C NMR, <sup>19</sup>F NMR spectra .....</b> | <b>S29</b> |

## 1. Materials and equipment

Unless otherwise special indicated, all the reagents were purchased from commercial supplies unless otherwise stated. And all the solvents were used as received without further purification. The instrument for electrolysis was dual display potentiostat (HY3005B) (made in China, HYELEC), the GF anode ( $5.25 \times 0.8 \times 0.2$  cm<sup>3</sup>) and Pb cathode ( $5.25 \times 0.8 \times 0.2$  cm<sup>3</sup>) were purchased from Shanghai Fanyue Electronic Technology Co., LTD. Thin layer chromatography (TLC) employed glass 0.20-0.25 mm silica gel plates (GF254). Flash chromatography columns were packed with 200-300 mesh silica gel in petroleum (bp. 60-90°C). Gradient flash chromatography was conducted eluting with PE (petroleum)/EA (ethyl acetate), they are listed as volume/volume ratios. (Hetero)aryl boronic acids were purchased from JiaHe Co., LTD., (Shanghai). Thiosulfonates were purchased from EYu Co., LTD., (Wuhan). Amino acids used were L-Amino Acids. NMR spectra were recorded on a Bruker Avance III spectrometer (<sup>1</sup>H NMR: 400 MHz; <sup>13</sup>C NMR: 101 MHz; <sup>19</sup>F NMR: 376.8 MHz) or a JEOL-ECX500 instrument (<sup>1</sup>H NMR: 500 MHz; <sup>13</sup>C NMR: 125 MHz). Chemical shifts were reported in ppm downfield. Coupling constants were quoted in Hz (*J*). Multiplicity was indicated as follows: s (singlet), d (doublet), t (triplet), q (quartet), m (multiplet). High resolution mass spectra (HRMS) were measured using Thermo Scientific Q Exactive. Mass spectra (MS) were measured using electron ionization (EI) method by GC-MS.

## 2. Experimental procedure

### 2.1 General procedure for the synthesis of 3

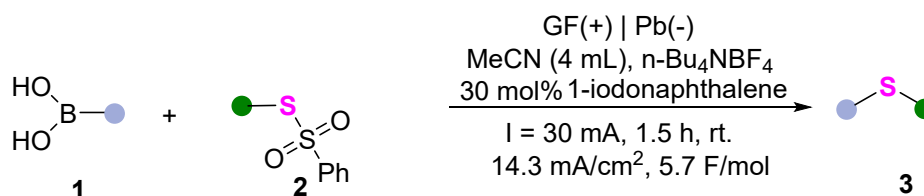

A 10-mL undivided three-necked bottle was equipped with a GF anode ( $5.25 \times 0.8 \times 0.2$  cm<sup>3</sup>) and Pb cathode ( $5.25 \times 0.8 \times 0.2$  cm<sup>3</sup>) which was connected to a DC regulated power supply. Under N<sub>2</sub> atmosphere, **1** (0.2 mmol), **2** (0.26 mmol), 1-

iodonaphthalene (0.06 mmol) and  $n\text{-Bu}_4\text{NBF}_4$  (0.4 mmol) were dissolved in 4 mL MeCN, and the cell was electrolyzed at a constant current of 30 mA ( $\sim 14.3 \text{ mA/cm}^2$ ), and the mixture was stirred for 1.5 h at environment temperature. The electrolysis was terminated when the starting materials were consumed as determined by TLC. Then the reaction mixture was diluted with 50 mL ethyl acetate, washed with a saturated solution of brine ( $2 \times 15 \text{ mL}$ ), dried ( $\text{Na}_2\text{SO}_4$ ), and concentrated in vacuum, and the resulting residue was purified by silica gel column chromatography (eluent: PE/EA) to afford the desired products **3**.

## 2.2 Experimental procedure for the synthesis of **3as**

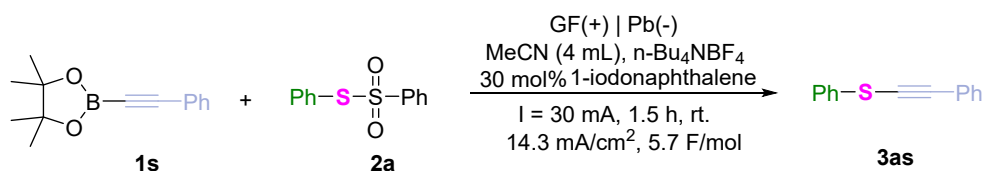

A 10-mL undivided three-necked bottle was equipped with a GF anode ( $5.25 \times 0.8 \times 0.2 \text{ cm}^3$ ) and Pb cathode ( $5.25 \times 0.8 \times 0.2 \text{ cm}^3$ ) which was connected to a DC regulated power supply. Under  $\text{N}_2$  atmosphere, **1s** (0.2 mmol, 45.6 mg), **2a** (0.26 mmol, 65.1 mg), 1-iodonaphthalene (0.06 mmol) and  $n\text{-Bu}_4\text{NBF}_4$  (0.4 mmol) were dissolved in 4 mL MeCN, and the cell was electrolyzed at a constant current of 30 mA ( $\sim 14.3 \text{ mA/cm}^2$ ) for 1.5 h at environment temperature. The electrolysis was terminated when the starting materials were consumed as determined by TLC. Then the reaction mixture was diluted with 50 mL ethyl acetate, washed with a saturated solution of brine ( $2 \times 15 \text{ mL}$ ), dried ( $\text{Na}_2\text{SO}_4$ ), and concentrated in vacuum, and the resulting residue was purified by silica gel column chromatography (eluent: PE/EA) to afford the desired products **3as**.

### 2.3 Experimental procedure for the synthesis of **3au**

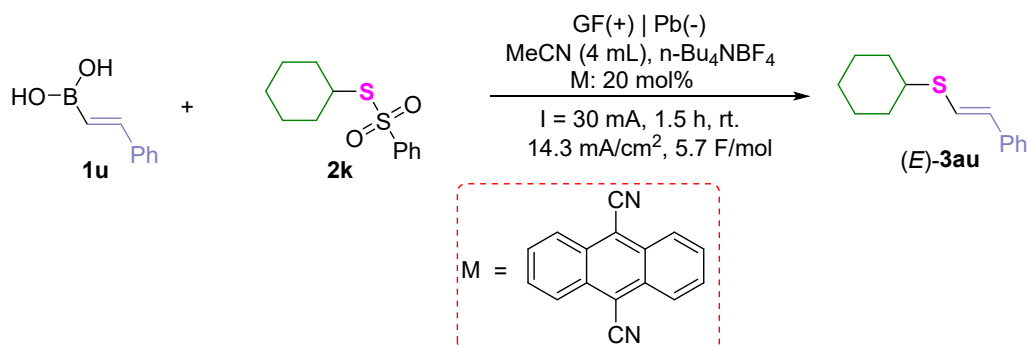

A 10-mL undivided three-necked bottle was equipped with a GF anode ( $5.25 \times 0.8 \times 0.2 \text{ cm}^3$ ) and Pb cathode ( $5.25 \times 0.8 \times 0.2 \text{ cm}^3$ ) which was connected to a DC regulated power supply. Under  $\text{N}_2$  atmosphere, (*E*)-styrylboronic acid **1u** (0.2 mmol, 29.6 mg), **2k** (0.26 mmol, 74.5 mg), 9,10-anthracenedicarbonitrile (0.04 mmol, 9.1 mg) and  $n\text{-Bu}_4\text{NBF}_4$  (0.4 mmol) were dissolved in 4 mL MeCN, and the cell was electrolyzed at a constant current of 30 mA ( $\sim 14.3 \text{ mA/cm}^2$ ) for 1.5 h at environment temperature. The electrolysis was terminated when the starting materials were consumed as determined by TLC. Then the reaction mixture was diluted with 30 mL ethyl acetate, washed with a saturated solution of brine ( $2 \times 15 \text{ mL}$ ), dried ( $\text{Na}_2\text{SO}_4$ ), and concentrated in vacuum, and the resulting residue was purified by silica gel column chromatography (eluent: PE/EA) to afford the desired products **3au**.

### 2.4 Scale-up reaction procedure

A 100-mL undivided three-necked bottle was equipped with a GF anode ( $5.25 \times 0.8 \times 0.2 \text{ cm}^3$ ) and Pb cathode ( $5.25 \times 0.8 \times 0.2 \text{ cm}^3$ ) which was connected to a DC regulated power supply. Under  $\text{N}_2$  atmosphere, **1a** (5 mmol, 610 mg), **2a** (6.5 mmol, 1.63 g), 1-iodonaphthalene (1.5 mmol) and  $n\text{-Bu}_4\text{NBF}_4$  (10.0 mmol) were dissolved in 20 mL MeCN, and the cell was electrolyzed at a constant current of 30 mA ( $\sim 14.3 \text{ mA/cm}^2$ ) for 1.5 h at environment temperature. The electrolysis was terminated when the starting materials were consumed as determined by TLC. Then the reaction mixture was diluted with 100 mL ethyl acetate, washed with a saturated solution of brine ( $2 \times 30 \text{ mL}$ ), dried ( $\text{Na}_2\text{SO}_4$ ), and concentrated in vacuum, and the resulting

residue was purified by silica gel column chromatography (eluent: PE/EA = 100:1) to afford the desired products **3aa**.

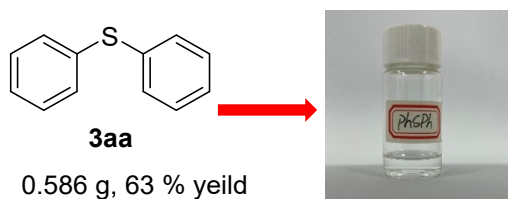

Figure S1. Product **3aa**.

## 2.5 General procedure for the synthesis of intermediate

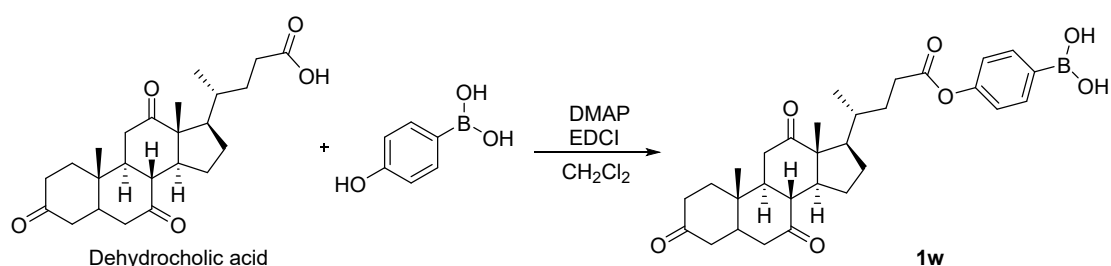

To a stirred solution of **Dehydrocholic acid** (1.2 mmol), **4-Hydroxyphenylboronic acid** (1.0 mmol, 266.33 mg) and 4-dimethylaminopyridine (DMAP, 12.22 mg, 0.1 mmol) in  $\text{CH}_2\text{Cl}_2$  (5 mL), a  $\text{CH}_2\text{Cl}_2$  solution (2 mL) of 1-(3-dimethylaminopropyl)-3-ethylcarbodiimide hydrochloride (EDCI, 1.2 mmol, 230.04 mg) was added dropwise. The mixture was stirred at room temperature overnight. After completion, the mixture was filtered through a thin pad of celite and rinsed with additional  $\text{CH}_2\text{Cl}_2$  (20 mL). The filtrate was concentrated in vacuo, and the residue was purified by flash column chromatography on silica gel to afford the desired intermediate **1w**.

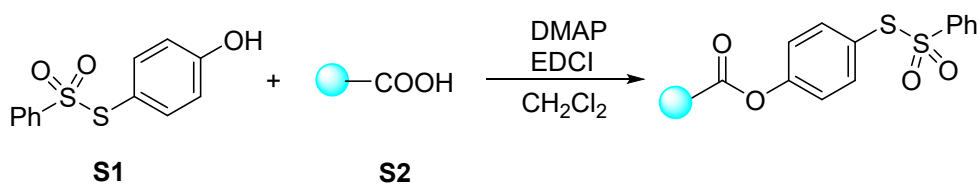

To a stirred solution of acid **S2** (1.2 mmol), thiosulfonate **S1** (1.0 mmol, 266.33 mg) and 4-dimethylaminopyridine (DMAP, 12.22 mg, 0.1 mmol) in  $\text{CH}_2\text{Cl}_2$  (5 mL), a  $\text{CH}_2\text{Cl}_2$  solution (2 mL) of 1-(3-dimethylaminopropyl)-3-ethylcarbodiimide hydrochloride (EDCI, 1.2 mmol, 230.04 mg) was added dropwise. The mixture was stirred at room temperature overnight. After completion, the mixture was filtered through a thin pad of celite and rinsed with additional  $\text{CH}_2\text{Cl}_2$  (20 mL). The filtrate

was concentrated in vacuo, and the residue was purified by flash column chromatography on silica gel to afford the desired intermediate **2o** and **2p**.

### 3. Optimization of reaction

**Table S1 Screening for electrode materials**

| $\text{Ph-B(OH)}_2 + \text{Ph-S-C(=O)}_2\text{Ph} \xrightarrow[\text{I = 30 mA, 1.5 h, rt.}]{\text{MeCN (4 mL), n-Bu}_4\text{NBF}_4, \text{ 30 mol\% 1-iodonaphthalene}} \text{Ph-S-Ph}$ <p style="text-align: center;">14.3 mA/cm<sup>2</sup>, 5.7 F/mol</p> |                                         |                    |
|---------------------------------------------------------------------------------------------------------------------------------------------------------------------------------------------------------------------------------------------------------------|-----------------------------------------|--------------------|
| <b>1a</b>                                                                                                                                                                                                                                                     | <b>2a</b>                               | <b>3aa</b>         |
| Entry                                                                                                                                                                                                                                                         | Variation from the standard conditions  | Isolated yield (%) |
| 1                                                                                                                                                                                                                                                             | none                                    | 81                 |
| 2                                                                                                                                                                                                                                                             | C(+)   Pb(-) instead of GF(+)   Pb(-)   | 22                 |
| 3                                                                                                                                                                                                                                                             | GF(+)   Ni(-) instead of GF(+)   Pb(-)  | n.d.               |
| 4                                                                                                                                                                                                                                                             | RVC(+)   Ni(-) instead of GF(+)   Pb(-) | 45                 |
| 5                                                                                                                                                                                                                                                             | GF(+)   GF(-) instead of GF(+)   Pb(-)  | n.d.               |

**Table S2 Screening for electrolytes**

| $\text{Ph-B(OH)}_2 + \text{Ph-S-C(=O)}_2\text{Ph} \xrightarrow[\text{I = 30 mA, 1.5 h, rt.}]{\text{GF(+)   Pb(-), MeCN (4 mL), electrolyte, 30 mol\% 1-iodonaphthalene}} \text{Ph-S-Ph}$ <p style="text-align: center;">14.3 mA/cm<sup>2</sup>, 5.7 F/mol</p> |                                                                                  |                    |
|---------------------------------------------------------------------------------------------------------------------------------------------------------------------------------------------------------------------------------------------------------------|----------------------------------------------------------------------------------|--------------------|
| <b>1a</b>                                                                                                                                                                                                                                                     | <b>2a</b>                                                                        | <b>3aa</b>         |
| Entry                                                                                                                                                                                                                                                         | Variation from the standard conditions                                           | Isolated yield (%) |
| 1                                                                                                                                                                                                                                                             | none                                                                             | 81                 |
| 2                                                                                                                                                                                                                                                             | n-Bu <sub>4</sub> NPF <sub>6</sub> instead of n-Bu <sub>4</sub> NBF <sub>4</sub> | 58                 |
| 3                                                                                                                                                                                                                                                             | n-Bu <sub>4</sub> NI instead of n-Bu <sub>4</sub> NBF <sub>4</sub>               | 41                 |
| 4                                                                                                                                                                                                                                                             | Et <sub>4</sub> NBF <sub>4</sub> instead of n-Bu <sub>4</sub> NBF <sub>4</sub>   | 60                 |
| 5                                                                                                                                                                                                                                                             | NH <sub>4</sub> Br instead of n-Bu <sub>4</sub> NBF <sub>4</sub>                 | 55                 |
| 6                                                                                                                                                                                                                                                             | NaBr instead of n-Bu <sub>4</sub> NBF <sub>4</sub>                               | 64                 |

**Table S3 Screening for solvents**

| $\text{Ph-B(OH)}_2 + \text{Ph-S-C(=O)}_2\text{Ph} \xrightarrow[\text{I = 30 mA, 1.5 h, rt.}]{\text{GF(+)   Pb(-), Solvent, n-Bu}_4\text{NBF}_4, \text{ 30 mol\% 1-iodonaphthalene}} \text{Ph-S-Ph}$ <p style="text-align: center;">14.3 mA/cm<sup>2</sup>, 5.7 F/mol</p> |           |            |
|--------------------------------------------------------------------------------------------------------------------------------------------------------------------------------------------------------------------------------------------------------------------------|-----------|------------|
| <b>1a</b>                                                                                                                                                                                                                                                                | <b>2a</b> | <b>3aa</b> |





#### 4. Cyclic voltammetry experiments

Cyclic voltammetry was performed in a three-electrode cell connected to a schlenk line at room temperature. The working electrode was a steady glassy carbon disk electrode, the counter electrode a platinum wire. The reference was an Ag/AgCl electrode submerged in saturated aqueous KCl solution. 4 mL of MeCN containing 0.1 M n-Bu<sub>4</sub>NBF<sub>4</sub> were poured into the electrochemical cell in all experiments. The scan rate is 0.01 V/s, ranging from 0.0 V to -3.0 V.

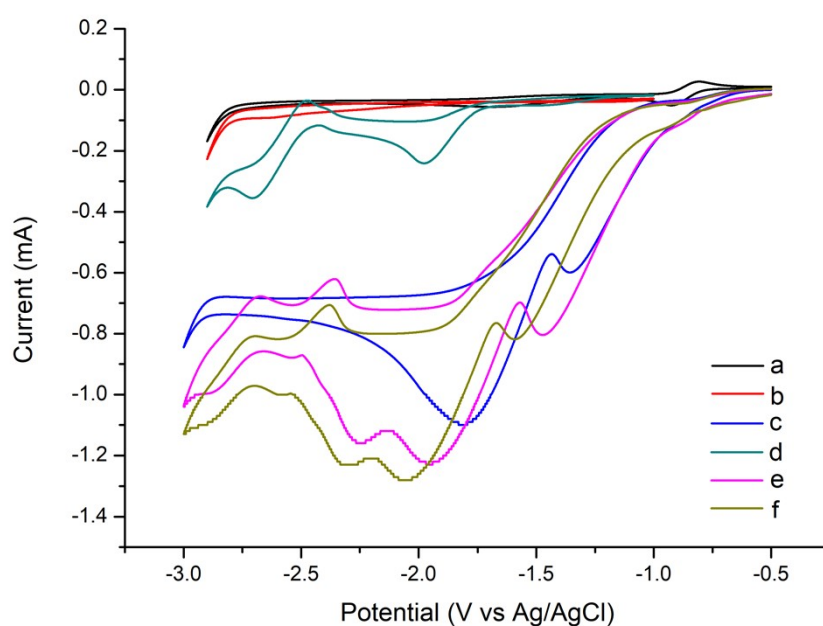

**Figure S2.** plotting convention (IUPAC)

In **Figure S2**, Cyclic voltammograms of 0.1 mol L<sup>-1</sup> of n-Bu<sub>4</sub>NBF<sub>4</sub> in 4 mL of MeCN solution containing different compounds: (a) blank experiment; (b) **1a** (0.2 mmol); (c) **2a** (0.26 mmol); (d) 1-iodonaphthalene (0.06 mmol); (e) **2a** (0.26 mmol) + 1-iodonaphthalene (0.06 mmol); (f) **1a** (0.2 mmol) + **2a** (0.26 mmol) + 1-iodonaphthalene (0.06 mmol); with a GC disk working electrode, Pt counter electrode, and Ag/AgCl reference electrode at 0.01 V/s scan rate.

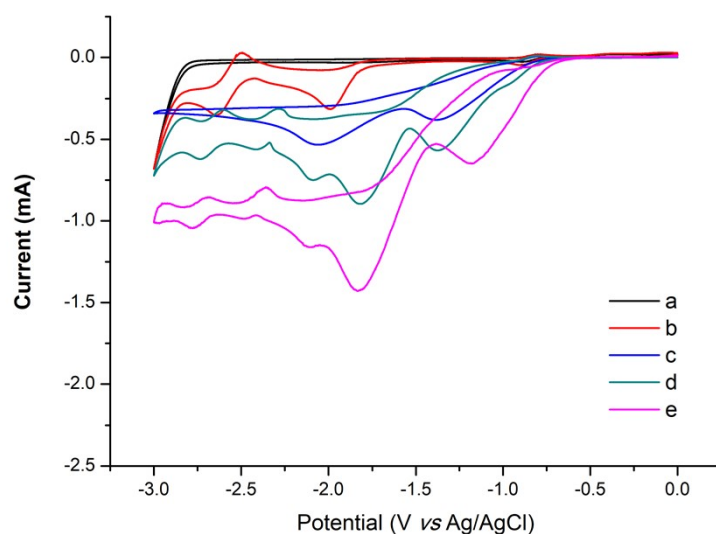

**Figure S3.** CV analyses of **2a** and 1-iodonaphthalene

In **Figure S3**, Cyclic voltammograms of 0.1 mol L<sup>-1</sup> of n-Bu<sub>4</sub>NBF<sub>4</sub> in 4 mL of MeCN solution containing different compounds: (a) blank experiment; (b) 1-iodonaphthalene (0.06 mmol); (c) **2a** (0.13 mmol); (d) **2a** (0.13 mmol) + 1-iodonaphthalene (0.06 mmol); (e) **2a** (0.26 mmol) + 1-iodonaphthalene (0.06 mmol); with a GC disk working electrode, Pt counter electrode, and Ag/AgCl reference electrode at 0.01 V/s scan rate.

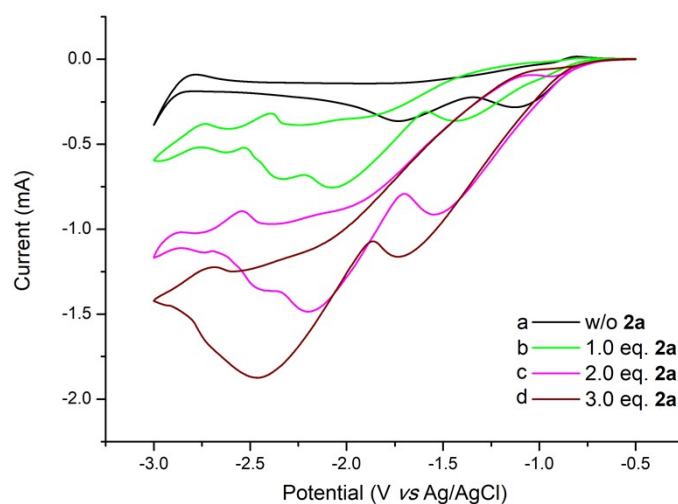

**Figure S4.** CVs of 1-iodonaphthalene performed in the presence of increasing equivalents of **2a**.

In **Figure S4**, Cyclic voltammograms of 0.1 mol L<sup>-1</sup> of n-Bu<sub>4</sub>NBF<sub>4</sub> in 4 mL of MeCN solution containing different compounds: (a) blank experiment; (b) **2a** (0.13 mmol) + 1-iodonaphthalene (0.06 mmol); (c) **2a** (0.26 mmol) + 1-iodonaphthalene (0.06 mmol); (d) **2a** (0.39 mmol) + 1-iodonaphthalene (0.06 mmol); with a GC disk working electrode, Pt counter electrode, and Ag/AgCl reference electrode at 0.01 V/s scan rate.

## 5. Analysis of by-product

### 5.1 High-resolution mass spectra of disulfide

Reaction conditions: Reaction conditions: GF anode (5.25 × 0.8 × 0.2 cm<sup>3</sup>), Pb cathode (5.25 × 0.8 × 0.2 cm<sup>3</sup>), **1a** (0.2 mmol, 1 equiv.), *S*-(4-methoxyphenyl) benzenesulfonylthioate (0.26 mmol, 1.3 equiv.), 1-iodonaphthalene (30 mol%), n-Bu<sub>4</sub>NBF<sub>4</sub> (0.4 mmol, 2 equiv), MeCN (4.0 mL), undivided cell, room temperature, 30 mA, 1.5 h. The corresponding reaction mixture was detected by HRMS. We successfully detected the desired disulfide.

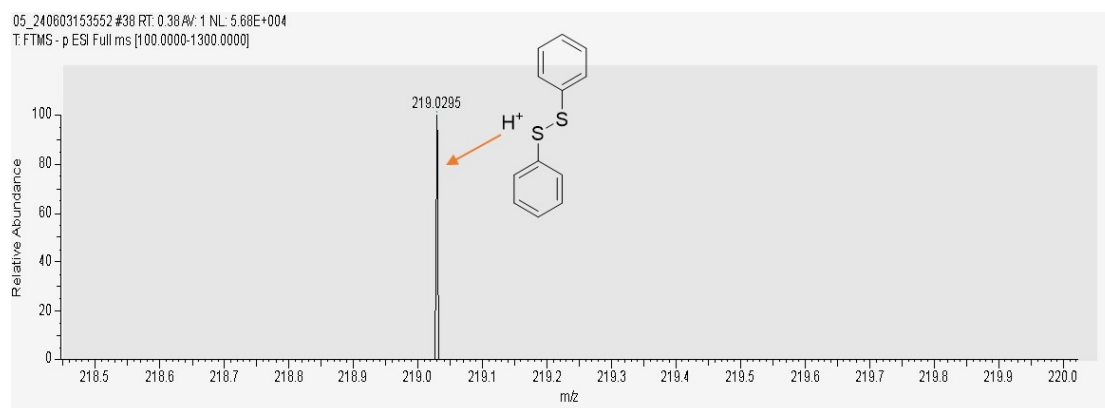

**Figure S5.** HMRS spectra of disulfide

### 5.2 GC-mass spectra of naphthalene

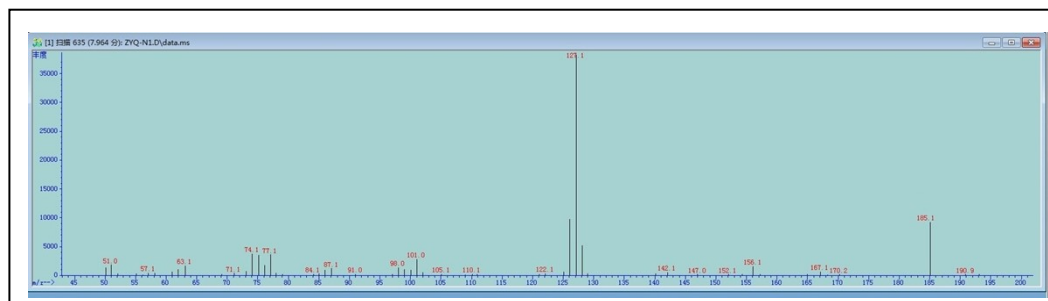

**Figure S6.** GC-mass spectra of naphthalene

Reaction conditions: Reaction conditions: GF anode (5.25 × 0.8 × 0.2 cm<sup>3</sup>), Pb cathode (5.25 × 0.8 × 0.2 cm<sup>3</sup>), **1a** (0.2 mmol, 1 equiv.), *S*-(4-methoxyphenyl) benzenesulfonylthioate (0.26 mmol, 1.3 equiv.), 1-iodonaphthalene (30 mol%), n-

Bu<sub>4</sub>NBF<sub>4</sub> (0.4 mmol, 2 equiv), MeCN (4.0 mL), undivided cell, room temperature, 30 mA, 1.5 h. The corresponding reaction mixture was detected by GC-mass. We successfully detected the desired naphthalene.

## 6. Radical trapping experiments

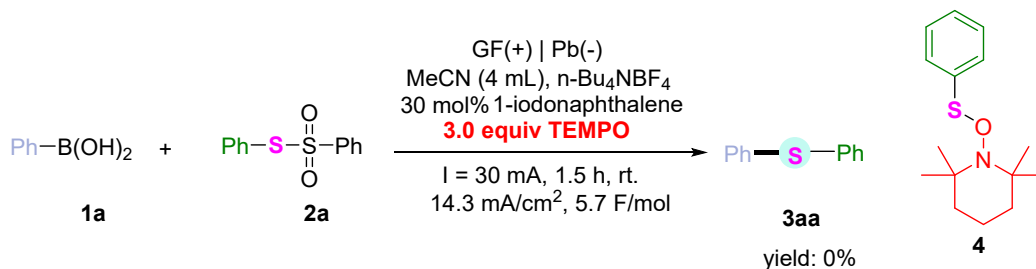

Reaction conditions: GF anode, Pb cathode, **1a** (0.2 mmol, 1 equiv.), *S*-(4-methoxyphenyl) benzenesulfonylthioate (0.26 mmol, 1.3 equiv.), 1-iodonaphthalene (30 mol%), n-Bu<sub>4</sub>NBF<sub>4</sub> (0.4 mmol, 2 equiv), TEMPO (0.6 mmol, 3 equiv), MeCN (4.0 mL), undivided cell, room temperature, 30 mA, 1.5 h. The corresponding reaction mixture was detected by HRMS, and intermediate **4** was successfully detected.

T: FTMS + p ESI Full ms [100.0000-1300.0000]

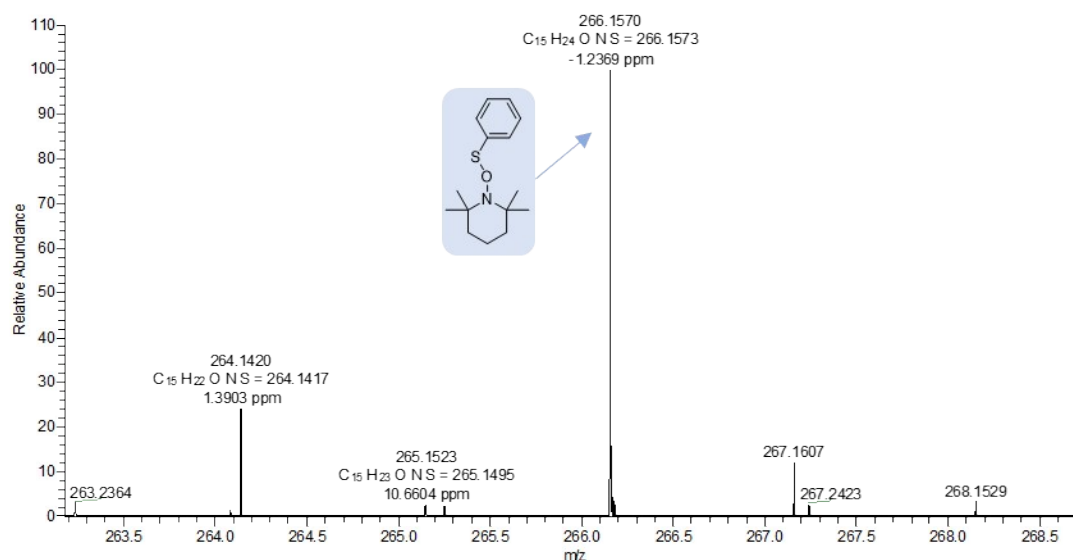

Figure S7. HRMS analysis was performed for **4**

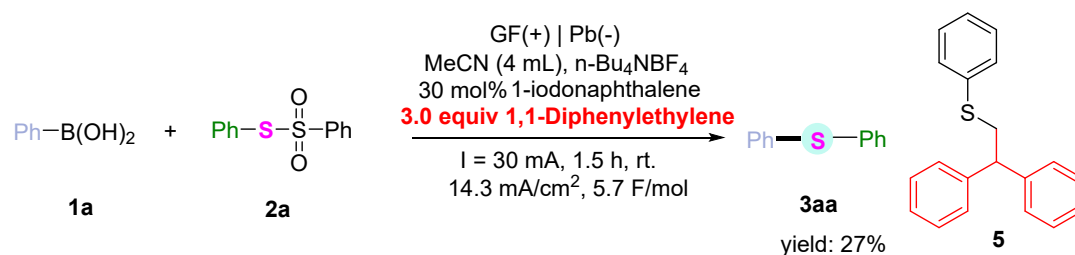

Reaction conditions: GF anode, Pb cathode, **1a** (0.2 mmol, 1 equiv.), *S*-(4-methoxyphenyl) benzenesulfonylthioate (0.26 mmol, 1.3 equiv.), 1-iodonaphthalene (30 mol%),  $n\text{-Bu}_4\text{NBF}_4$  (0.4 mmol, 2 equiv), 1,1-diyldibenzene (0.6 mmol, 3 equiv), MeCN (4.0 mL), undivided cell, room temperature, 30 mA, 1.5 h. The corresponding reaction mixture was detected by HRMS, and intermediate **5** was successfully detected.

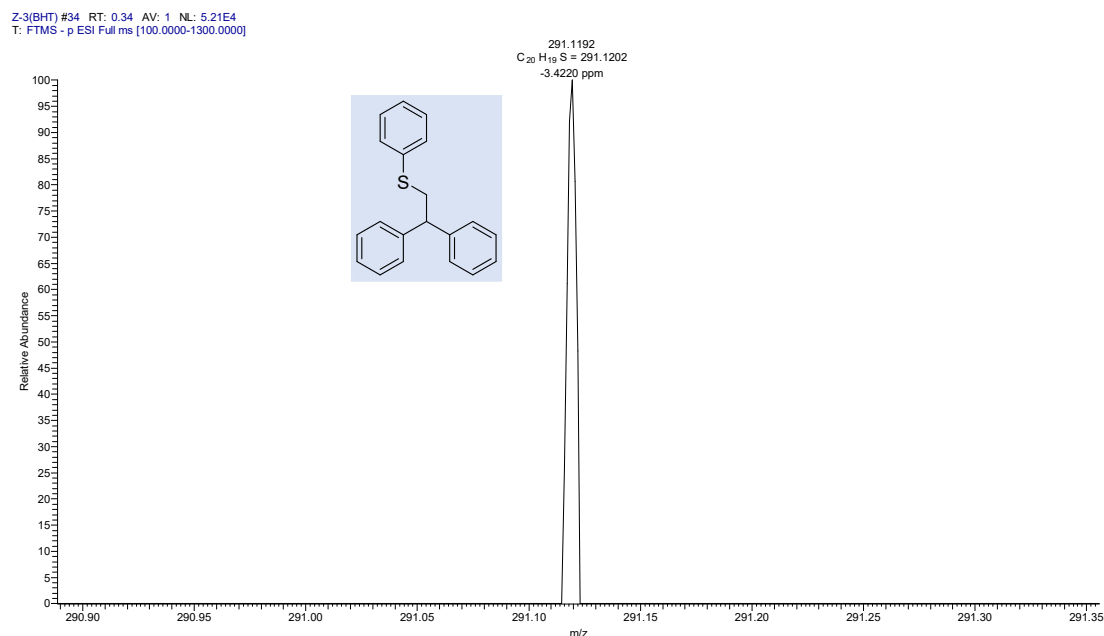

**Figure S8.** HRMS analysis was performed for **5**

## 7. Characterization data of products

### (4-(((4*R*)-4-((8*R*,9*S*,10*S*,13*R*,14*S*,17*R*)-10,13-dimethyl-3,7,12-trioxohexadecahydro-1*H*-cyclopenta[*a*]phenanthren-17-yl)pentanoyl)oxy)phenyl)boronic acid (1w)

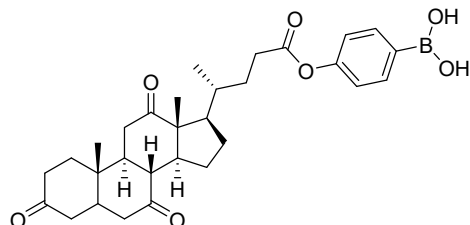

Overall Yield: 36% (151 mg). Nature: Colorless oil. Purification of the product was performed by silica gel column chromatography (eluent: PE/EA = 1:1). <sup>1</sup>H NMR (500 MHz, CDCl<sub>3</sub>) δ 7.58 – 7.54 (m, 2H), 7.25 (s, 2H), 7.04 – 7.00 (m, 2H), 2.55 – 2.31 (m, 12H), 2.10 – 2.03 (m, 1H), 1.92 – 1.83 (m, 3H), 1.73 (m, 1H), 1.67 – 1.53 (m, 4H), 1.52 – 1.43 (m, 2H), 1.36 – 1.26 (m, 1H), 0.99 (s, 3H), 0.87 (dd, *J* = 6.7, 1.5 Hz, 3H), 0.84 (d, *J* = 1.3 Hz, 3H). <sup>13</sup>C NMR (125 MHz, CDCl<sub>3</sub>) δ 211.2, 210.4, 209.4, 172.4, 151.7, 135.7, 135.7, 134.1, 121.5, 121.5, 56.4, 51.1, 49.7, 49.6, 46.0, 44.9, 44.4, 43.9, 39.3, 38.0, 35.9, 35.6, 35.0, 32.3, 31.4, 27.4, 25.7, 18.8, 12.9, 12.5. HRMS (ESI): *m/z* for C<sub>30</sub>H<sub>39</sub>BO<sub>7</sub> [*M*+*H*]<sup>+</sup> calcd 522.2789, found 522.2791.

### (4-((2-(2-Methyl-1*H*-indol-3-yl)ethyl)carbamoyl)phenyl)boronic acid (1x)<sup>1</sup>

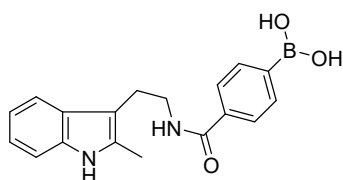

The synthesis of the compound followed the reported method <sup>1</sup>. The NMR data matched those previously reported. Overall Yield: 45% (80.5 mg). Nature: white solid. Purification of the product was performed by silica gel column chromatography (eluent: DCM/MeOH = 7:1). <sup>1</sup>H NMR (600 MHz, DMSO-*d*<sub>6</sub>) δ 10.71 (s, 1H), 8.58 (t, *J* = 5.8 Hz, 1H), 7.85 (d, *J* = 8.1 Hz, 2H), 7.79 (d, *J* = 8.2 Hz, 2H), 7.48 (d, *J* = 7.7 Hz, 1H), 7.23 (d, *J* = 7.9 Hz, 1H), 6.97 (t, *J* = 6.8 Hz, 1H), 6.93 (t, *J* = 6.8 Hz, 1H), 3.43 - 3.39 (m, 2H), 2.89 (t, *J* = 7.5 Hz, 2H), 2.31 (s, 3H); <sup>13</sup>C NMR (151 MHz, DMSO-*d*<sub>6</sub>) δ 166.2, 136.0, 135.2, 133.9, 132.1, 128.4, 126.0, 125.9, 121.0, 119.8,

117.3, 110.5, 107.7, 40.4, 24.1, 11.2. HRMS (ESI):  $m/z$  for  $C_{18}H_{19}BN_2O_3$   $[M+H]^+$  calcd 323.1562, found 323.1558.

**4-((Phenylsulfonyl)thio)phenyl 2-(4-isobutylphenyl) propanoate (2r)**

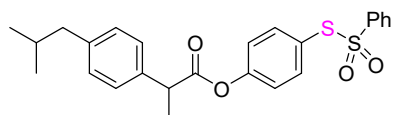

Overall Yield: 94% (429.3 mg). Nature: white solid. Purification of the product was performed by silica gel column chromatography (eluent: PE/EA = 5:1).  $^1H$  NMR (400 MHz,  $CDCl_3$ )  $\delta$  7.59 – 7.54 (m, 3H), 7.44 - 7.40 (m, 2H), 7.33 - 7.27 (m, 4H), 7.16 (d,  $J$  = 8.1 Hz, 2H), 7.00 (d,  $J$  = 8.7 Hz, 2H), 3.93 (q,  $J$  = 7.1 Hz, 1H), 2.49 (d,  $J$  = 7.2 Hz, 2H), 1.92 - 1.82 (m, 1H), 1.61 (d,  $J$  = 7.1 Hz, 3H), 0.92 (s, 3H), 0.91 (s, 3H);  $^{13}C$  NMR (101 MHz,  $CDCl_3$ )  $\delta$  172.5, 153.5, 142.8, 141.1, 137.7, 136.8, 133.7, 129.6, 128.9, 127.5, 127.1, 124.9, 122.7, 45.3, 45.0, 30.2, 22.4, 18.4. HRMS (ESI):  $m/z$  for  $C_{25}H_{26}O_4S_2$   $[M+H]^+$  calcd 455.1345, found 455.1340.

**4-((Phenylsulfonyl)thio)phenyl 5-(2,5-dimethylphenoxy)-2,2-dimethylpentanoate (2s)**

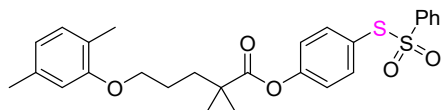

Overall Yield: 64% (318.5 mg). Nature: white solid. Purification of the product was performed by silica gel column chromatography (eluent: PE/EA = 5:1).  $^1H$  NMR (400 MHz,  $CDCl_3$ )  $\delta$  7.61 - 7.57 (m, 3H), 7.47 - 7.43 (m, 2H), 7.37 - 7.33 (m, 2H), 7.04 - 7.00 (m, 3H), 6.68 (dd,  $J$  = 7.5, 1.6 Hz, 1H), 6.63 (d,  $J$  = 1.6 Hz, 1H), 3.99 (t,  $J$  = 5.4 Hz, 2H), 2.31 (s, 3H), 2.17 (s, 3H), 1.95 - 1.81 (m, 4H), 1.38 (s, 6H);  $^{13}C$  NMR (101 MHz,  $CDCl_3$ )  $\delta$  175.7, 156.7, 153.7, 142.8, 137.8, 136.5, 133.7, 130.4, 128.9, 127.6, 124.8, 123.5, 122.8, 120.8, 111.9, 67.6, 42.6, 37.0, 25.2, 25.0, 21.4, 15.8. HRMS (ESI):  $m/z$  for  $C_{27}H_{30}O_5S_2$   $[M+Na]^+$  calcd 521.1427, found 521.1430.

**Diphenyl sulfane (3aa)<sup>2</sup>**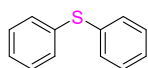

Overall Yield: 81% (30.0 mg). Nature: Colorless oil. Purification of the product was performed by silica gel column chromatography (eluent: PE/EA = 100:1). <sup>1</sup>H NMR (400 MHz, CDCl<sub>3</sub>) δ 7.37 - 7.32 (m, 4H), 7.31 - 7.28 (m, 4H), 7.25 - 7.22 (m, 2H); <sup>13</sup>C NMR (101 MHz, CDCl<sub>3</sub>) δ 135.7, 131.5, 129.2, 127.0; HRMS (ESI): m/z for C<sub>12</sub>H<sub>10</sub>S [M+H]<sup>+</sup> Calcd 187.0576, found 187.0578.

**Phenyl 4-methylphenyl sulfide (3ab)<sup>2</sup>**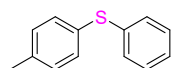

Overall Yield: 79% (35.2 mg). Nature: Colorless oil. Purification of the product was performed by silica gel column chromatography (eluent: PE/EA = 100:1). <sup>1</sup>H NMR (400 MHz, CDCl<sub>3</sub>) δ 7.3 - 7.25 (m, 6H), 7.20 - 7.16 (m, 1H), 7.14 (d, *J* = 8.0 Hz, 2H), 2.34(s, 3H); <sup>13</sup>C NMR (101 MHz, CDCl<sub>3</sub>) δ 137.6, 137.1, 132.3, 131.3, 130.0, 129.8, 129.0, 126.4, 21.1; HRMS (ESI): m/z for C<sub>13</sub>H<sub>12</sub>S [M+H]<sup>+</sup> calcd 201.0733, found 201.0734.

**(4-Methoxyphenyl)(phenyl)sulfane (3ac)<sup>2</sup>**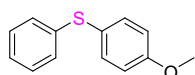

Overall Yield: 75% (29.0 mg). Nature: Colorless oil. Purification of the product was performed by silica gel column chromatography (eluent: PE/EA = 100:1). <sup>1</sup>H NMR (400 MHz, CDCl<sub>3</sub>) δ 7.51 (d, *J* = 8.0 Hz, 2H), 7.34 - 7.20 (m, 5H), 6.99 (d, *J* = 8.0 Hz, 2H), 3.90 (s, 3H); <sup>13</sup>C NMR (101 MHz, CDCl<sub>3</sub>) δ 159.8, 138.6, 134.9, 128.9, 128.2, 126.3, 124.7, 115.3, 54.8; HRMS (ESI): m/z for C<sub>13</sub>H<sub>12</sub>OS [M+H]<sup>+</sup> calcd 217.0682, found 217.0681.

**Methyl(4-(phenylthio)phenyl)sulfane (3ad)<sup>2</sup>**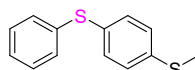



Overall Yield: 61% (28.3 mg). Nature: Colorless oil. Purification of the product was performed by silica gel column chromatography (eluent: PE/EA = 100:1).  $^1\text{H}$  NMR (400 MHz,  $\text{CDCl}_3$ )  $\delta$  7.32 - 7.28 (m, 2H), 7.24 - 7.19 (m, 1H), 2.48 (s, 1H);  $^{13}\text{C}$  NMR (101 MHz,  $\text{CDCl}_3$ )  $\delta$  138.2, 136.5, 132.3, 131.4, 130.2, 129.1, 127.1, 126.7, 15.7; HRMS (ESI):  $m/z$  for  $\text{C}_{13}\text{H}_{12}\text{S}_2$   $[\text{M}+\text{H}]^+$  calcd 233.0453, found 233.0455.

**(4-Fluorophenyl)(phenyl)sulfane (3ae)<sup>2</sup>**

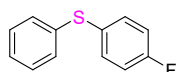

Overall Yield: 64 % (26.1 mg). Nature: Colorless oil. Purification of the product was performed by silica gel column chromatography (eluent: PE/EA = 100:1).  $^1\text{H}$  NMR (400 MHz,  $\text{CDCl}_3$ )  $\delta$  7.40 - 7.35 (m, 2H), 7.30 - 7.27 (m, 4H), 7.23 - 7.20 (m, 1H), 7.02 (t,  $J$  = 8.4 Hz, 2H);  $^{13}\text{C}$  NMR (101 MHz,  $\text{CDCl}_3$ )  $\delta$  162.4 (d,  $J$  = 247.8 Hz), 136.6, 134.1 (d,  $J$  = 8.2 Hz), 130.2 (d,  $J$  = 3.4 Hz), 129.9, 129.2, 126.8, 116.4 (d,  $J$  = 22.0 Hz);  $^{19}\text{F}$  NMR (376 MHz,  $\text{CDCl}_3$ )  $\delta$  -114.0. HRMS (ESI):  $m/z$  for  $\text{C}_{12}\text{H}_9\text{FS}$   $[\text{M}+\text{H}]^+$  calcd 205.0482, found 204.0480.

**(4-Chlorophenyl)(phenyl)sulfane (3af)<sup>2</sup>**

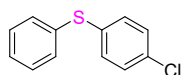

Overall Yield: 72% (31.8 mg). Nature: Colorless oil. Purification of the product was performed by silica gel column chromatography (eluent: PE/EA = 100:1).  $^1\text{H}$  NMR (400 MHz,  $\text{CDCl}_3$ )  $\delta$  7.36 - 7.26 (m, 9H);  $^{13}\text{C}$  NMR (101 MHz,  $\text{CDCl}_3$ )  $\delta$  135.1, 134.6, 133.0, 132.0, 131.3, 129.3, 129.3, 127.4; HRMS (ESI):  $m/z$  for  $\text{C}_{12}\text{H}_9\text{ClS}$   $[\text{M}+\text{H}]^+$  calcd 221.0186, found 221.0188.

**Phenyl(4-(trifluoromethyl)phenyl)sulfane (3ag)<sup>2</sup>**

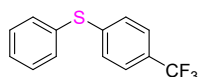

Overall Yield: 60% (30.5 mg). Nature: Colorless oil. Purification of the product was performed by silica gel column chromatography (eluent: PE/EA = 90:2).  $^1\text{H}$  NMR (400 MHz,  $\text{CDCl}_3$ )  $\delta$  7.49 (d,  $J$  = 7.8 Hz, 4H), 7.38 (d,  $J$  = 5.5 Hz, 3H), 7.26 (d,  $J$  =

8.1 Hz, 2H);  $^{13}\text{C}$  NMR (101 MHz,  $\text{CDCl}_3$ )  $\delta$  142.8, 133.5, 132.5, 129.7, 128.6, 128.2, 128.0 (q,  $J = 32.6$  Hz), 125.8 (q,  $J = 3.8$  Hz), 124.1 (q,  $J = 271.8$  Hz);  $^{19}\text{F}$  NMR (376 MHz,  $\text{CDCl}_3$ )  $\delta$  -62.5. HRMS (ESI):  $m/z$  for  $\text{C}_{13}\text{H}_9\text{F}_3\text{S}$   $[\text{M}+\text{H}]^+$  calcd 255.0450, found 255.0448.

### Phenyl(*m*-tolyl)sulfane (3ah)<sup>2</sup>

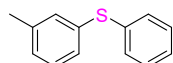

Overall Yield: 70% (28.0 mg). Nature: Colorless oil. Purification of the product was performed by silica gel column chromatography (eluent: PE/EA = 100:1).  $^1\text{H}$  NMR (400 MHz,  $\text{CDCl}_3$ )  $\delta$  7.33 - 7.27 (m, 4H), 7.24 - 7.14 (m, 4H), 7.06 (d,  $J = 6.0$  Hz, 2H), 2.30 (s, 3H);  $^{13}\text{C}$  NMR (101 MHz,  $\text{CDCl}_3$ )  $\delta$  139.0, 136.1, 135.2, 131.8, 130.7, 129.1, 129.0, 128.3, 128.0, 126.8, 21.2; HRMS (ESI):  $m/z$  for  $\text{C}_{13}\text{H}_{12}\text{S}$   $[\text{M}+\text{H}]^+$  calcd 201.7863, found 201.7861.

### Phenyl(*o*-tolyl)sulfane (3ai)<sup>2</sup>

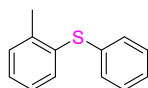

Overall Yield: 68% (27.2 mg). Nature: Colorless oil. Purification of the product was performed by silica gel column chromatography (eluent: PE/EA = 100:1).  $^1\text{H}$  NMR (400 MHz,  $\text{CDCl}_3$ )  $\delta$  7.30 - 7.23 (m, 5H), 7.21 - 7.17 (m, 3H), 7.16-7.10 (m, 1H), 2.38 (s, 3H);  $^{13}\text{C}$  NMR (101 MHz,  $\text{CDCl}_3$ )  $\delta$  139.9, 136.1, 133.7, 132.9, 130.6, 129.6, 129.1, 127.9, 126.7, 126.3, 20.6; HRMS (ESI):  $m/z$  for  $\text{C}_{13}\text{H}_{12}\text{S}$   $[\text{M}+\text{H}]^+$  calcd 201.0799, found 201.0985.

### (5-Chloro-2-methoxyphenyl)(phenyl)sulfane (3aj)<sup>3</sup>

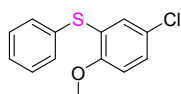

Overall Yield: 73% (36.6 mg). Nature: Colorless oil. Purification of the product was performed by silica gel column chromatography (eluent: PE/EA = 100:1).  $^1\text{H}$  NMR

(400 MHz, CDCl<sub>3</sub>)  $\delta$  7.44 (d,  $J$  = 1.5 Hz, 2H), 7.42-34 (m, 3H), 7.14 (dd,  $J$  = 7.2, 2.4 Hz, 1H), 6.87 (s, 1H), 6.87 – 6.79 (m, 1H), 3.87 (s, 3H); <sup>13</sup>C NMR (101 MHz, CDCl<sub>3</sub>)  $\delta$  155.0, 133.0, 132.3, 129.5, 129.1, 128.1, 127.4, 127.1, 126.0, 111.5, 56.2. HRMS (ESI):  $m/z$  for C<sub>13</sub>H<sub>11</sub>ClOS [M+H]<sup>+</sup> calcd 251.0292, found 251.0289.

### Methyl 3-nitro-5-(phenylthio)benzoate (3ak)

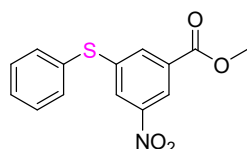

Overall Yield: 27% (15.6 mg). Nature: Colorless oil. Purification of the product was performed by silica gel column chromatography (eluent: PE/EA = 100:1). <sup>1</sup>H NMR (400 MHz, CDCl<sub>3</sub>)  $\delta$  9.02 (t,  $J$  = 1.8 Hz, 1H), 8.78 (t,  $J$  = 2.0 Hz, 1H), 8.73 (t,  $J$  = 1.7 Hz, 1H), 7.40 - 7.35 (m, 5H), 3.92 (s, 3H). <sup>13</sup>C NMR (101 MHz, CDCl<sub>3</sub>)  $\delta$  164.4, 147.1, 134.7, 133.6, 131.9, 131.6, 129.3, 127.4, 125.8, 124.6, 53.1. HRMS (ESI):  $m/z$  for C<sub>14</sub>H<sub>11</sub>NO<sub>4</sub>S [M+H]<sup>+</sup> calcd 290.0482, found 290.0480.

### 1-(4-(Phenylthio)phenyl)ethan-1-one (3al)<sup>3</sup>

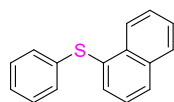

Overall Yield: 67% (31.7 mg). Nature: Colorless oil. Purification of the product was performed by silica gel column chromatography (eluent: PE/EA = 50:1). <sup>1</sup>H NMR (400 MHz, CDCl<sub>3</sub>)  $\delta$  8.40–8.36 (m, 1H), 7.90–7.86 (m, 2H), 7.68–7.67 (m, 1H), 7.54–7.51 (m, 2H), 7.46–7.44 (m, 1H), 7.24–7.14 (m, 5H); <sup>13</sup>C NMR (101 MHz, CDCl<sub>3</sub>)  $\delta$  136.9, 134.2, 133.5, 132.6, 131.1, 129.2, 129.1, 128.9, 128.5, 126.9, 126.4, 126.1, 125.8, 125.6; HRMS (ESI):  $m/z$  for C<sub>16</sub>H<sub>12</sub>S [M+H]<sup>+</sup> calcd 237.0733, found 237.0735.

### Phenanthren-9-yl(phenyl)sulfane (3am)<sup>4</sup>

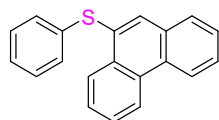

Overall Yield: 78% (44.7 mg). Nature: Colorless oil. Purification of the product was performed by silica gel column chromatography (eluent: PE/EA = 50:1).  $^1\text{H}$  NMR (400 MHz,  $\text{CDCl}_3$ )  $\delta$  8.76 (dd,  $J$  = 8.0, 1.2 Hz, 2H), 8.50 (d,  $J$  = 8.0 Hz, 1H), 8.04 (s, 1H), 7.85 (d,  $J$  = 8.0 Hz, 1H), 7.72 - 7.68 (m, 2H), 7.64 - 7.60 (m, 2H), 7.28 - 7.22 (m, 4H), 7.22 - 7.16 (m, 1H);  $^{13}\text{C}$  NMR (101 MHz,  $\text{CDCl}_3$ )  $\delta$  136.6, 134.0, 131.6, 131.5, 131.0, 130.6, 129.5, 129.1, 128.8, 128.5, 127.4, 127.2, 127.1, 127.0, 126.5, 126.1, 123.0, 122.6; HRMS (ESI):  $m/z$  for  $\text{C}_{20}\text{H}_{14}\text{S}$   $[\text{M}+\text{H}]^+$  calcd 287.0889, found 286.0891.

#### 5-(Phenylthio)benzo[*d*][1,3]dioxole (3an)

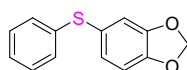

Overall Yield: 51% (23.4 mg). Nature: Colorless oil. Purification of the product was performed by silica gel column chromatography (eluent: PE/EA = 100:1).  $^1\text{H}$  NMR (400 MHz,  $\text{CDCl}_3$ )  $\delta$  7.28 - 7.21 (m, 4H), 7.19 - 7.15 (m, 1H), 7.01 (dd,  $J$  = 8.0, 1.8 Hz, 1H), 6.91 (d,  $J$  = 1.8 Hz, 1H), 6.81 (d,  $J$  = 8.0 Hz, 1H), 5.99 (s, 2H),  $^{13}\text{C}$  NMR (101 MHz,  $\text{CDCl}_3$ )  $\delta$  148.3, 147.9, 137.9, 129.0, 128.9, 127.4, 126.2, 126.2, 113.6, 109.0, 101.4. HRMS (ESI):  $m/z$  for  $\text{C}_{13}\text{H}_{10}\text{O}_2\text{S}$   $[\text{M}+\text{H}]^+$  calcd 231.0474, found 231.0476.

#### 6-(Phenylthio)-1*H*-indole (3ao)<sup>5</sup>

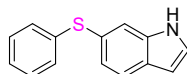

Overall Yield: 51% (23.0 mg). Nature: Colorless oil. Purification of the product was performed by silica gel column chromatography (eluent: PE/EA = 100:1).  $^1\text{H}$  NMR (500 MHz,  $\text{CDCl}_3$ )  $\delta$  7.26 - 7.25 (m, 2H), 7.22 - 7.15 (m, 5H), 7.12 - 7.10 (m, 1H), 6.57 - 6.55 (m, 1H);  $^{13}\text{C}$  NMR (125 MHz,  $\text{CDCl}_3$ )  $\delta$  139.7, 135.6, 128.9, 128.8, 128.2,

127.6, 127.4, 125.3, 125.1, 123.0, 112.1, 102.8. HRMS (ESI):  $m/z$  for  $C_{14}H_{11}NS$   $[M+H]^+$  calcd 266.1685, found 266.1681.

### 6-(Phenylthio)benzofuran (3ap)<sup>5</sup>

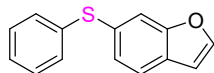

Overall Yield: 60% (27.1 mg). Nature: Colorless oil. Purification of the product was performed by silica gel column chromatography (eluent: PE/EA = 100:1). <sup>1</sup>H NMR (400 MHz, CDCl<sub>3</sub>)  $\delta$  7.76 (d,  $J$  = 1.9 Hz, 1H), 7.67 (d,  $J$  = 2.2 Hz, 1H), 7.51 (d,  $J$  = 8.5 Hz, 1H), 7.43 (dd,  $J$  = 8.6, 1.9 Hz, 1H), 7.31 - 7.23 (m, 4H), 7.19 - 7.17 (m, 1H), 6.77 - 7.76 (m, 1H). <sup>13</sup>C NMR (101 MHz, CDCl<sub>3</sub>)  $\delta$  154.7, 145.9, 138.1, 129.6, 129.0, 128.9, 128.6, 127.8, 126.4, 126.1, 112.3, 106.4. HRMS (ESI):  $m/z$  for  $C_{14}H_{10}OS$   $[M+H]^+$  calcd 227.2525, found 227.2527.

### 6-(Phenylthio)benzo[b]thiophene (3aq)<sup>5</sup>

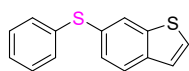

Overall Yield: 53% (25.7mg). Nature: Colorless oil. Purification of the product was performed by silica gel column chromatography (eluent: PE/EA = 100:1). <sup>1</sup>H NMR (400 MHz, CDCl<sub>3</sub>)  $\delta$  7.86 (d,  $J$  = 1.8 Hz, 1H), 7.80 (d,  $J$  = 8.4 Hz, 1H), 7.44 (d,  $J$  = 5.5 Hz, 1H), 7.36 (dd,  $J$  = 8.4, 1.7 Hz, 1H), 7.28 - 7.22 (m, 5H), 7.20 - 7.15 (m, 1H). <sup>13</sup>C NMR (101 MHz, CDCl<sub>3</sub>)  $\delta$  140.5, 139.1, 137.1, 130.6, 129.9, 129.1, 128.3, 127.5, 127.4, 126.5, 123.5, 123.2. HRMS (ESI):  $m/z$  for  $C_{14}H_{10}S_2$   $[M+H]^+$  calcd 243.0297, found 243.0230.

### 2-(Phenylthio)pyridine (3ar)<sup>5</sup>

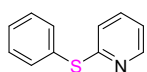

Overall Yield: 44% (16.4 mg). Nature: Colorless oil. Purification of the product was performed by silica gel column chromatography (eluent: PE/EA = 100:1). <sup>1</sup>H NMR (400 MHz, CDCl<sub>3</sub>)  $\delta$  8.46 (dd,  $J$  = 3.7, 1.7 Hz, 1H), 7.60 (td,  $J$  = 6.7, 1.6 Hz, 1H), 7.51 - 7.42 (m, 2H), 7.37 - 7.27 (m, 3H), 7.23 (dd,  $J$  = 6.6, 1.4 Hz, 1H), 7.19 - 7.17

(m, 1H).  $^{13}\text{C}$  NMR (101 MHz,  $\text{CDCl}_3$ )  $\delta$  157.4, 149.7, 137.0, 136.8, 131.5, 129.1, 127.8, 124.4, 121.2; HRMS (ESI):  $m/z$  for  $\text{C}_{11}\text{H}_9\text{NS}$   $[\text{M}+\text{H}]^+$  calcd 188.3529, found 188.3531.

### Phenyl(phenylethynyl)sulfane (3as)<sup>5</sup>

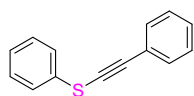

Overall Yield: 32% (13.4 mg). Nature: Colorless oil. Purification of the product was performed by silica gel column chromatography (eluent: PE/EA = 100:1).  $^1\text{H}$  NMR (400 MHz,  $\text{CDCl}_3$ )  $\delta$  7.43 - 7.38 (m, 4H), 7.25 - 7.24 (m, 5H), 7.17 - 7.15 (m, 1H).  $^{13}\text{C}$  NMR (101 MHz,  $\text{CDCl}_3$ )  $\delta$  133.1, 131.9, 129.4, 128.8, 128.4, 126.8, 126.3, 123.1, 98.0, 75.3. HRMS (ESI):  $m/z$  for  $\text{C}_{14}\text{H}_{10}\text{S}$   $[\text{M}+\text{H}]^+$  calcd 211.1576, found 211.1578.

### (Z/E)-Phenyl(styryl)sulfane (3at)<sup>5</sup>

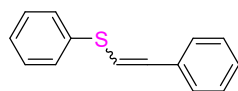

Overall Yield: 50% (21.2 mg). Nature: Colorless oil. Purification of the product was performed by silica gel column chromatography (eluent: PE/EA = 100:1).  $^1\text{H}$  NMR (400 MHz,  $\text{CDCl}_3$ )  $\delta$  7.35 - 7.33 (m, 4H), 7.29 - 7.28 (m, 5H), 7.27 - 7.26 (m, 1H), 6.91(d,  $J$  = 12.4 Hz, 1H), 6.76 (d,  $J$  = 12.4Hz, 1H).  $^{13}\text{C}$  NMR (101 MHz,  $\text{CDCl}_3$ )  $\delta$  137.3, 135.2, 132.8, 131.8, 129.8, 129.2, 138.7, 128.7, 127.6, 126.0. HRMS (ESI):  $m/z$  for  $\text{C}_{14}\text{H}_{12}\text{S}$   $[\text{M}+\text{H}]^+$  calcd 213.4733, found 213.4734.

### (E)-Cyclohexyl(styryl)sulfane (3au)<sup>6</sup>

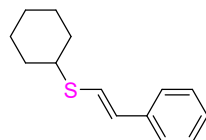

Overall Yield: 45% (19.7 mg). Nature: Colorless oil. Purification of the product was performed by silica gel column chromatography (eluent: PE/EA = 100:1).  $^1\text{H}$  NMR (500 MHz,  $\text{CDCl}_3$ )  $\delta$  7.46 - 7.45 (m, 2H), 7.38 - 7.31 (m, 3H), 6.80 (d,  $J$  = 15.6 Hz,

1H), 6.62 (dd,  $J = 14.1, 1.6$  Hz, 1H), 3.16 – 3.14 (m, 1H), 1.75 – 1.64 (m, 2H), 1.63 – 1.53 (m, 5H), 1.43 – 1.38 (m, 3H).  $^{13}\text{C}$  NMR (125 MHz,  $\text{CDCl}_3$ )  $\delta$  135.1, 129.2, 129.0, 127.7, 127.6, 126.0, 44.8, 35.5, 25.5, 24.7. HRMS (ESI):  $m/z$  for  $\text{C}_{14}\text{H}_{18}\text{S}$   $[\text{M}+\text{H}]^+$  calcd 219.1202, found 219.1201.

**4-(Phenylthio)phenyl (4R)-4-((8R,9S,10S,13R,14S,17R)-10,13-dimethyl-3,7,12-trioxohexadeca hydro- 1H-cyclopenta[a]phenanthren-17-yl)pentanoate (3aw)**

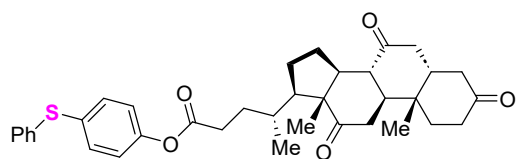

Overall Yield: 52% (60.9 mg). Nature: Colorless oil. Purification of the product was performed by silica gel column chromatography (eluent: PE/EA = 3:1).  $^1\text{H}$  NMR (600 MHz,  $\text{CDCl}_3$ )  $\delta$  7.57 (m, 3H), 7.43 (t,  $J = 7.7$  Hz, 2H), 7.34 (d,  $J = 8.3$  Hz, 2H), 7.06 (d,  $J = 8.8$  Hz, 2H), 2.94 – 2.82 (m, 3H), 2.64 (m, 1H), 2.52 (m, 1H), 2.38 – 2.00 (m, 12H), 1.95 (m, 2H), 1.86 (td,  $J = 11.3, 7.0$  Hz, 1H), 1.61 (td,  $J = 14.4, 4.6$  Hz, 1H), 1.52 (ddt,  $J = 14.0, 9.0, 4.5$  Hz, 1H), 1.40 (s, 3H), 1.36 – 1.33 (m, 1H), 1.31 – 1.25 (m, 1H), 1.08 (s, 3H), 0.90 (d,  $J = 6.5$  Hz, 3H).  $^{13}\text{C}$  NMR (151 MHz,  $\text{CDCl}_3$ )  $\delta$  211.9, 209.0, 208.7, 171.8, 153.3, 142.7, 137.8, 133.7, 128.9, 127.5, 124.8, 122.7, 56.8, 51.7, 48.9, 46.8, 45.5, 44.9, 42.7, 38.6, 36.4, 35.9, 35.4, 35.2, 31.5, 30.2, 27.6, 25.1, 21.9, 18.6, 11.8. HRMS (ESI):  $m/z$  for  $\text{C}_{36}\text{H}_{42}\text{O}_5\text{S}$   $[\text{M}+\text{Na}]^+$  calcd 609.2645, found 609.2647.

**N-(2-(2-methyl-1H-indol-3-yl)ethyl)-4-(phenylthio)benzamide (3ax)**

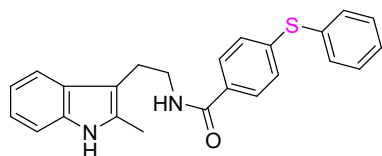

Overall Yield: 50% (38.7 mg). Nature: Colorless oil. Purification of the product was performed by silica gel column chromatography (eluent: PE/EA = 3:1).  $^1\text{H}$  NMR (600 MHz,  $\text{CDCl}_3$ )  $\delta$  8.01 (d,  $J = 13.0$  Hz, 1H), 7.69 – 7.60 (m, 1H), 7.51 (d,  $J = 8.4$  Hz, 2H), 7.43 – 7.41 (m, 2H), 7.38 – 7.31 (m, 4H), 7.28 (d,  $J = 8.0$  Hz, 1H), 7.18 (d,  $J =$

8.4 Hz, 2H), 7.14 - 7.05 (m, 2H), 3.68 (q,  $J = 6.4$  Hz, 2H), 3.02 (q,  $J = 6.6$  Hz, 2H), 2.35 (s, 3H).  $^{13}\text{C}$  NMR (151 MHz,  $\text{CDCl}_3$ )  $\delta$  166.8, 141.6, 135.3, 133.2, 132.9, 132.2, 132.1, 129.5, 128.6, 128.5, 128.2, 127.4, 121.2, 119.4, 117.7, 110.4, 108.4, 40.4, 24.0, 11.6. HRMS (ESI):  $m/z$  for  $\text{C}_{24}\text{H}_{22}\text{N}_2\text{OS}$   $[\text{M}+\text{H}]^+$  calcd 387.1526, found 387.1529. 52.9, 45.8, 25.2, 17.8. HRMS (ESI):  $m/z$  for  $\text{C}_{35}\text{H}_{34}\text{N}_7\text{O}_3\text{S}_2$   $[\text{M}+\text{Na}]^+$  calcd 722.1745, found 722.1742.

### [1,1'-Biphenyl]-4-yl(phenyl)sulfane (3ba)<sup>5</sup>

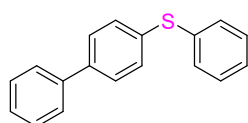

Overall Yield: 51% (26.8 mg). Nature: Colorless oil. Purification of the product was performed by silica gel column chromatography (eluent: PE/EA = 100:1).  $^1\text{H}$  NMR (400 MHz,  $\text{CDCl}_3$ )  $\delta$  7.58 - 7.51 (m, 4H), 7.45 - 7.24 (m, 10H).  $^{13}\text{C}$  NMR (101 MHz,  $\text{CDCl}_3$ )  $\delta$  140.3, 140.0, 135.7, 134.9, 131.3, 131.2, 129.2, 128.8, 127.8, 127.5, 127.2, 127.0. HRMS (ESI):  $m/z$  for  $\text{C}_{18}\text{H}_{14}\text{S}$   $[\text{M}+\text{H}]^+$  calcd 263.0889, found 263.0891.

### 4-(Phenylthio)aniline (3ca)<sup>5</sup>

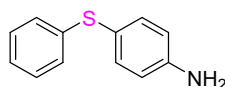

Overall Yield: 49% (19.7 mg). Nature: Colorless oil. Purification of the product was performed by silica gel column chromatography (eluent: PE/EA = 10:1).  $^1\text{H}$  NMR (400 MHz,  $\text{CDCl}_3$ )  $\delta$  7.61 - 7.55 (m, 3H), 7.45 - 7.41 (m, 2H), 7.12 - 7.09 (m, 2H), 6.63 - 6.59 (m, 2H), 4.33 (s, 2H).  $^{13}\text{C}$  NMR (101 MHz,  $\text{CDCl}_3$ )  $\delta$  148.9, 143.1, 138.3, 133.4, 128.7, 127.6, 115.7, 115.6. HRMS (ESI):  $m/z$  for  $\text{C}_{12}\text{H}_{11}\text{NS}$   $[\text{M}+\text{H}]^+$  calcd 202.2685, found 202.2681.

### *tert*-Butyl (4-(phenylthio)phenyl)carbamate (3da)<sup>7</sup>

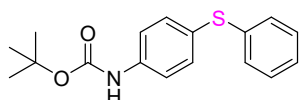



Overall Yield: 50% (30.1 mg). Nature: Colorless oil. Purification of the product was performed by silica gel column chromatography (eluent: PE/EA = 10:1).  $^1\text{H}$  NMR (400 MHz,  $\text{CDCl}_3$ )  $\delta$  7.37 - 7.32 (m, 4H), 7.32 - 7.26 (m, 4H), 7.25 - 7.21 (m, 1H), 6.51 (s, 1H), 1.49 (s, 9H).  $^{13}\text{C}$  NMR (101 MHz,  $\text{CDCl}_3$ )  $\delta$  152.5, 139.1, 136.7, 131.3, 129.6, 129.1, 128.9, 127.1, 120.4, 28.2. HRMS (ESI):  $m/z$  for  $\text{C}_{17}\text{H}_{19}\text{NO}_2\text{S}$   $[\text{M}+\text{H}]^+$  calcd 302.1209, found 302.1231.

#### (4-Bromophenyl)(phenyl)sulfane (3ea)<sup>2</sup>

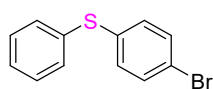

Overall Yield: 54% (28.6 mg). Nature: Colorless oil. Purification of the product was performed by silica gel column chromatography (eluent: PE/EA = 100:1).  $^1\text{H}$  NMR (400 MHz,  $\text{CDCl}_3$ )  $\delta$  7.41 (d,  $J$  = 8.5 Hz, 2H), 7.37 - 7.36 (m, 4H), 7.31 - 7.26 (m, 1H), 7.19 (d,  $J$  = 8.5 Hz, 2H).  $^{13}\text{C}$  NMR (101 MHz,  $\text{CDCl}_3$ )  $\delta$  135.5, 134.8, 133.2, 132.1, 131.5, 129.4, 127.5, 120.5. HRMS (ESI):  $m/z$  for  $\text{C}_{12}\text{H}_9\text{BrS}$   $[\text{M}+\text{H}]^+$  calcd 264.9681, found 264.9683.

#### 1-(4-(Phenylthio)phenyl)ethan-1-one (3fa)<sup>5</sup>

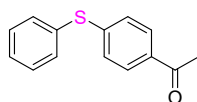

Overall Yield: 47% (21.5 mg). Nature: Colorless oil. Purification of the product was performed by silica gel column chromatography (eluent: PE/EA = 50:1).  $^1\text{H}$  NMR (400 MHz,  $\text{CDCl}_3$ )  $\delta$  7.83 - 7.80 (m, 2H), 7.51 - 7.48 (m, 2H), 7.43 - 7.38 (m, 3H), 7.23 - 7.20 (m, 2H), 2.55 (s, 3H);  $^{13}\text{C}$  NMR (100 MHz,  $\text{CDCl}_3$ )  $\delta$  197.1, 144.9, 134.5, 133.8, 132.1, 129.7, 128.9, 128.8, 127.4, 26.4; HRMS (ESI):  $m/z$  for  $\text{C}_{14}\text{H}_{12}\text{OS}$   $[\text{M}+\text{H}]^+$  calcd 229.0682, found 229.0680.

#### 2-(Phenylthio)benzo[d]oxazole (3ga)<sup>8</sup>

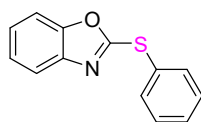

Overall Yield: 50% (24.6 mg). Nature: Colorless oil. Purification of the product was performed by silica gel column chromatography (eluent: PE/EA = 10:1).  $^1\text{H}$  NMR (400 MHz,  $\text{CDCl}_3$ )  $\delta$  7.72 - 7.68 (m, 2H), 7.60 - 7.58 (m, 1H), 7.46 - 7.38 (m, 3H), 7.28 - 7.20 (m, 1H), 7.28 - 7.20 (m, 2H);  $^{13}\text{C}$  NMR (100 MHz,  $\text{CDCl}_3$ )  $\delta$  163.2, 151.8, 141.9, 134.4, 129.8, 129.6, 127.1, 124.3, 124.2, 119.0, 110.0; HRMS (ESI):  $m/z$  for  $\text{C}_{13}\text{H}_9\text{NOS}$   $[\text{M}+\text{H}]^+$  calcd 288.0478, found 288.0480.

### 2-(Phenylthio)-1*H*-benzo[d]imidazole (3ha)<sup>9</sup>

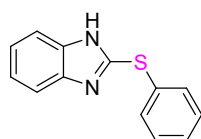

Overall Yield: 48% (22.3 mg). Nature: Colorless oil. Purification of the product was performed by silica gel column chromatography (eluent: PE/EA = 10:1).  $^1\text{H}$  NMR (500 MHz,  $\text{CDCl}_3$ )  $\delta$  7.79 - 7.75 (m, 1H), 7.49 - 7.40 (m, 3H), 7.36 - 7.28 (m, 3H), 7.21 - 7.16 (m, 2H);  $^{13}\text{C}$  NMR (125 MHz,  $\text{CDCl}_3$ )  $\delta$  151.1, 142.3, 138.7, 136.6, 130.6, 129.1, 127.8, 124.6, 122.3, 117.7, 111.9. HRMS (ESI):  $m/z$  for  $\text{C}_{13}\text{H}_{10}\text{NOS}$   $[\text{M}+\text{H}]^+$  calcd 227.0638, found 227.0635.

### 2-(Phenylthio)benzo[d]thiazole (3ia)<sup>10</sup>

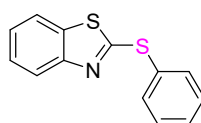

Overall Yield: 55% (26.8 mg). Nature: Colorless oil. Purification of the product was performed by silica gel column chromatography (eluent: PE/EA = 10:1).  $^1\text{H}$  NMR (400 MHz,  $\text{CDCl}_3$ )  $\delta$  7.75 - 7.73 (m, 1H), 7.66 - 7.64 (m, 2H), 7.52 - 7.46 (m, 1H), 7.43 - 7.39 (m, 3H), 7.29 - 7.27 (m, 1H), 7.27 - 7.25 (m, 1H).  $^{13}\text{C}$  NMR (101 MHz,  $\text{CDCl}_3$ )  $\delta$  169.8, 153.7, 135.4, 135.4, 130.5, 129.9, 129.9, 126.2, 124.4, 121.9, 120.8. HRMS (ESI):  $m/z$  for  $\text{C}_{13}\text{H}_9\text{NS}_2$   $[\text{M}+\text{H}]^+$  calcd 244.0250, found 244.0249.

### Cyclohexyl(phenyl)sulfane (3ja)<sup>5</sup>

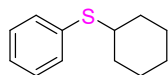

Overall Yield: 72% (27.7 mg). Nature: Colorless oil. Purification of the product was performed by silica gel column chromatography (eluent: PE/EA = 100:1). <sup>1</sup>H NMR (500 MHz, CDCl<sub>3</sub>) δ 7.30 - 7.29 (m, 5H), 3.40 – 3.39 (m, 1H), 1.86 – 1.81 (m, 2H), 1.66 - 1.53 (m, 5H), 1.49 - 1.40 (m, 3H). <sup>13</sup>C NMR (125 MHz, CDCl<sub>3</sub>) δ 134.7, 131.5, 129.0, 127.9, 46.7, 33.7, 25.5, 24.8. HRMS (ESI): m/z for C<sub>12</sub>H<sub>16</sub>S [M+H]<sup>+</sup> calcd 193.1046, found 193.1049.

### Methyl N-(tert-butoxycarbonyl)-S-phenyl-L-cysteinate (3ka)<sup>11</sup>

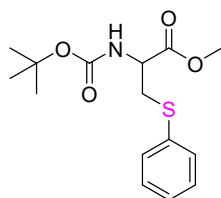

Overall Yield: 61% (37.7 mg). Nature: Colorless oil. Purification of the product was performed by silica gel column chromatography (eluent: PE/EA = 3:1). <sup>1</sup>H NMR (400 MHz, CDCl<sub>3</sub>) δ 7.42 - 7.40 (m, 2H), 7.40 - 7.42 (m, 2H), 7.30 - 7.26 (m, 1H), 7.23 - 7.21 (m, 1H), 5.35 (d, *J* = 8.0 Hz, 1H), 4.58 - 4.56 (m, 1H), 3.53 (s, 3H), 3.38 - 3.37 (m, 2H), 1.42 (s, 9H); <sup>13</sup>C NMR (101 MHz, CDCl<sub>3</sub>) δ 171.0, 155.0, 134.7, 131.0, 129.0, 127.0, 80.1, 53.2, 52.3, 37.2, 28.2. HRMS (ESI): m/z for C<sub>15</sub>H<sub>21</sub>NO<sub>4</sub>S [M+H]<sup>+</sup> calcd 312.1264, found 312.1262.

### Methyl phenyl-N-propylcysteinate (3la)

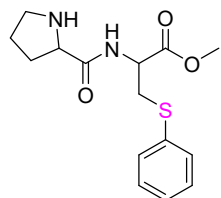

Overall Yield: 56% (14.5 mg). Nature: Colorless oil. Purification of the product was performed by silica gel column chromatography (eluent: PE/EA = 10:1). <sup>1</sup>H NMR (500 MHz, CDCl<sub>3</sub>) δ 7.70 (d, *J* = 8.8 Hz, 1H), 7.36 - 7.24 (m, 5H), 4.74 (dt, *J* = 5.1, 2.6 Hz, 1H), 4.40 (dt, *J* = 8.8, 5.0 Hz, 1H), 3.70 - 3.64 (m, 4H), 3.39 (dd, *J* = 14.4, 5.0

Hz, 1H), 3.29 (dd,  $J = 14.4, 5.0$  Hz, 1H), 3.02 - 2.87 (m, 2H), 1.92 - 1.84 (m, 1H), 1.81 - 1.74 (m, 2H), 1.73 - 1.68 (m, 1H).  $^{13}\text{C}$  NMR (125 MHz,  $\text{CDCl}_3$ )  $\delta$  172.2, 171.8, 137.9, 131.8, 130.5, 128.1, 61.1, 52.3, 52.3, 47.6, 35.4, 31.6, 26.4. HRMS (ESI):  $m/z$  for  $\text{C}_{15}\text{H}_{20}\text{N}_2\text{O}_3\text{S}^+$   $[\text{M}+\text{H}]^+$  calcd 309.1267, found 309.1269.

**(2R,3S,4S,5R,6R)-2-(Acetoxymethyl)-6-(*p*-tolylthio)tetrahydro-2*H*-pyran-3,4,5-triyl triacetate (3ma)<sup>12</sup>**

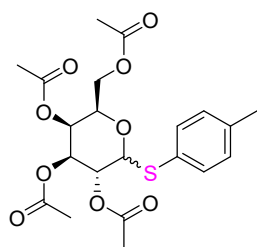

Overall Yield: 56% (39.1 mg). Nature: White solid. Purification of the product was performed by silica gel column chromatography (eluent: PE/EA = 3:1).  $^1\text{H}$  NMR (400 MHz,  $\text{CDCl}_3$ )  $\delta$  7.41 (d,  $J = 8.0$  Hz, 2H), 7.13 (d,  $J = 8.0$  Hz, 2H), 5.40 (d,  $J = 3.2$  Hz, 1H), 5.23 (t,  $J = 10.0$  Hz, 1H), 5.04 (dd,  $J = 10.0, 3.2$  Hz, 1H), 4.65 (d,  $J = 10.0$  Hz, 1H), 4.52 (m, 2H), 3.92 (t,  $J = 6.4$  Hz, 1H), 2.33 (s, 3H), 2.11 (s, 3H), 2.09 (s, 3H), 2.03 (s, 3H), 1.96 (s, 3H);  $^{13}\text{C}$  NMR (101 MHz,  $\text{CDCl}_3$ )  $\delta$  170.3, 170.2, 170.0, 169.4, 138.4, 133.1, 129.6, 128.6, 86.9, 74.3, 72.0, 67.2, 67.2, 61.5, 21.1, 20.8, 20.6, 20.6, 20.5; HRMS (ESI):  $m/z$  for  $\text{C}_{21}\text{H}_{26}\text{O}_9\text{S}$   $[\text{M}+\text{Na}]^+$  calcd 477.1190, found 477.1192.

**(2R,3R,4S,5R,6S)-2-(Acetoxymethyl)-6-(((2R,3R,4S,5R,6R)-4,5-diacetoxy-2-(acetoxymethyl)-6-(*p*-tolylthio)tetrahydro-2*H*-pyran-3-yl)oxy)tetrahydro-2*H*-pyran-3,4,5-triyl triacetate (3na)<sup>12</sup>**

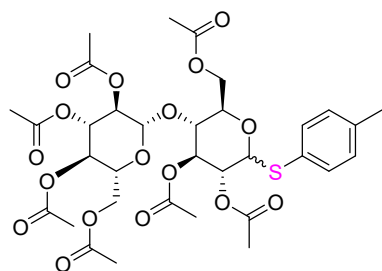

Overall Yield: 47% (13.5 mg). Nature: White solid. Purification of the product was performed by silica gel column chromatography (eluent: PE/EA = 1:1).  $^1\text{H}$  NMR (400

MHz, CDCl<sub>3</sub>)  $\delta$  7.37 (d,  $J$  = 8.4 Hz, 2H), 7.11 (d,  $J$  = 8.0 Hz, 2H), 5.34 (d,  $J$  = 2.8 Hz, 1H), 5.07 (t,  $J$  = 9.2 Hz, 1H), 5.07 - 5.02 (m, 1H), 4.94 - 4.90 (m, 1H), 4.86 (t,  $J$  = 9.8 Hz, 1H), 4.56 (d,  $J$  = 12.0 Hz, 1H), 4.51 - 4.47 (m, 2H), 4.12 - 4.00 (m, 3H), 3.72 (t,  $J$  = 9.6 Hz, 1H), 3.65 - 3.61 (m, 1H), 3.60 - 3.58 (m, 1H), 2.33 (s, 3H), 2.10 (s, 3H), 2.08 (s, 3H), 2.05 (s, 3H), 2.01 (s, 3H), 2.01 (s, 9H), 1.97 (s, 3H); <sup>13</sup>C NMR (101 MHz, CDCl<sub>3</sub>)  $\delta$  170.5, 170.2, 170.0, 169.7, 169.5, 169.3, 169.0, 138.6, 133.7, 129.6, 127.7, 100.7, 85.7, 76.3, 75.2, 73.6, 71.6, 70.7, 70.1, 69.4, 67.7, 61.9, 61.5, 60.9, 21.2, 20.8, 20.8, 20.7, 20.6, 20.6, 20.5. HRMS (ESI):  $m/z$  for C<sub>33</sub>H<sub>42</sub>O<sub>17</sub>S [M+Na]<sup>+</sup> calcd 765.2035, found 765.2032.

#### 4-(Phenylthio)phenyl 2-(4-isobutylphenyl)propanoate (30a)

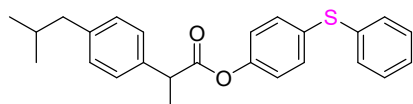

Overall Yield: 61% (47.6 mg). Nature: Colorless oil. Purification of the product was performed by silica gel column chromatography (eluent: PE/EA = 3:1). <sup>1</sup>H NMR (400 MHz, CDCl<sub>3</sub>)  $\delta$  7.36 - 7.30 (m, 4H), 7.30 - 7.16 (m, 5H), 7.15 (dd,  $J$  = 8.3, 2.5 Hz, 2H), 7.01 - 6.94 (m, 2H), 3.96 - 3.91 (m, 1H), 2.48 (dd,  $J$  = 7.3, 2.7 Hz, 2H), 1.92 (dt,  $J$  = 13.4, 6.7 Hz, 1H), 1.61 (d,  $J$  = 7.1 Hz, 3H), 0.92 (d,  $J$  = 2.7 Hz, 3H), 0.91 (d,  $J$  = 2.6 Hz, 3H). <sup>13</sup>C NMR (101 MHz, CDCl<sub>3</sub>)  $\delta$  173.0, 150.2, 141.5, 137.1, 132.6, 132.5, 130.6, 129.5, 129.3, 129.2, 127.2, 127.0, 122.3, 45.3, 45.0, 30.1, 22.4, 18.4. HRMS (ESI):  $m/z$  for C<sub>25</sub>H<sub>26</sub>O<sub>2</sub>S [M+H]<sup>+</sup> calcd 391.1726, found 391.1730.

#### 4-(Phenylthio)phenyl 5-(2,5-dimethylphenoxy)-2,2-dimethylpentanoate (3pa)

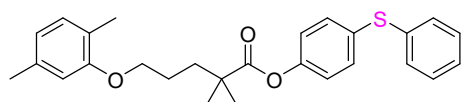

Overall Yield: 54% (46.9 mg). Nature: Colorless oil. Purification of the product was performed by silica gel column chromatography (eluent: PE/EA = 1:1). <sup>1</sup>H NMR (400 MHz, CDCl<sub>3</sub>)  $\delta$  7.44 - 7.41 (m, 2H), 7.39 - 7.28 (m, 5H), 7.08 - 7.03 (m, 3H), 6.72 (d,  $J$  = 7.5 Hz, 1H), 6.68 (d,  $J$  = 1.6 Hz, 1H), 4.08 - 4.01 (m, 2H), 2.36 (s, 3H), 2.23 (s, 3H), 1.97 - 1.90 (m, 4H), 1.43 (s, 6H). <sup>13</sup>C NMR (101 MHz, CDCl<sub>3</sub>)  $\delta$  176.2, 156.8,

150.3, 136.5, 136.1, 132.7, 132.4, 130.5, 130.3, 129.2, 126.9, 123.6, 122.4, 120.8, 111.9, 67.7, 42.5, 37.1, 29.7, 25.2, 25.1, 21.4, 15.8. HRMS (ESI):  $m/z$  for  $C_{27}H_{30}O_3S$   $[M+H]^+$  calcd 453.1988, found 453.1990.

## 8. References

1. R. Amaradhi, S. Mohammed, A. Banik, R. Franklin, R. Dingledine and T. Ganesh, *ACS Pharmacol. Trans. Sci.*, 2022, **5**, 118-133.
- 2 L. Y. Lam and C. Ma, *Org. Lett.*, 2021 **23**, 6164-6168.
- 3 S. K. Sinha, S. Panja, J. Grover, P. S. Hazra, S. Pandit, Y. Bairagi, X. Zhang and D. Maiti, *J. Am. Chem. Soc.*, 2022, **144**, 12032-12042.
- 4 Y.-C. Wong, T. T. Jayanth and C.-H. Cheng, *Org. Lett.*, 2006, **8**, 5613-5616.
- 5 Y. Liu, S. Xing, J. Zhang, W. Liu, Y. Xu, Y. Zhang, F. Yang, L. Yang, K. Jiang and X. Shao, *Org. Chem. Front.*, 2022, **9**, 1375-1382.
- 6 H. Wang, J. E. Erchinger, M. Lenz, S. Dutta, C. G. Daniliuc and F. Glorius, *J. Am. Chem. Soc.*, 2023, **145**, 23771-23780.
- 7 P. Mampuys, Y. Zhu, S. Sergeyev, E. Ruijter, R. V. Orru, S. Van Doorslae and B. U. Maes, *Org. Lett.*, 2016, **18**, 2808-2811.
- 8 Y. B. Bhujabal, K. S. Vadagaonkar, A. Gholap, Y. S. Sanghvi, R. Dandela and A. R. Kapdi, *J. Org. Chem.*, 2019, **84**, 15343-15354.
- 9 X. Liu and Z.-B. Dong, *J. Org. Chem.*, 2019, **84**, 11524-11532.
- 10 A. Jati, S. Dam, S. Kumar, K. Kumar and B. Maji, *Chem. Sci.*, 2023, **14**, 8624-8634.
- 11 J. Ying, J. Huang, C. Liu, F. Chen, C. Xu and F. Chen, *Org. Chem. Front.*, 2024, **11**, 53-59.
- 12 Z.-Y. Sun, W.-T. Yan and L.-H. Xie, *Org. Lett.*, 2023, **25**, 5714-5718.

## 9. Copies of $^1\text{H}$ NMR, $^{13}\text{C}$ NMR, $^{19}\text{F}$ NMR spectra

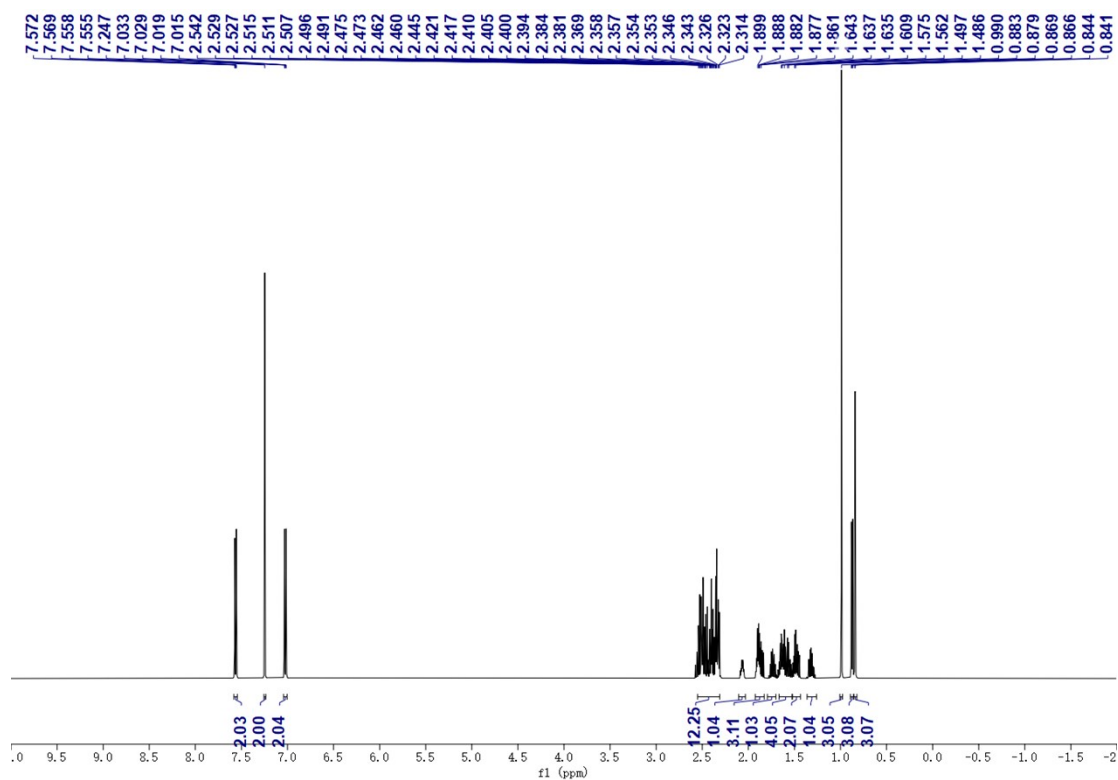

### 1w- $^1\text{H}$ NMR

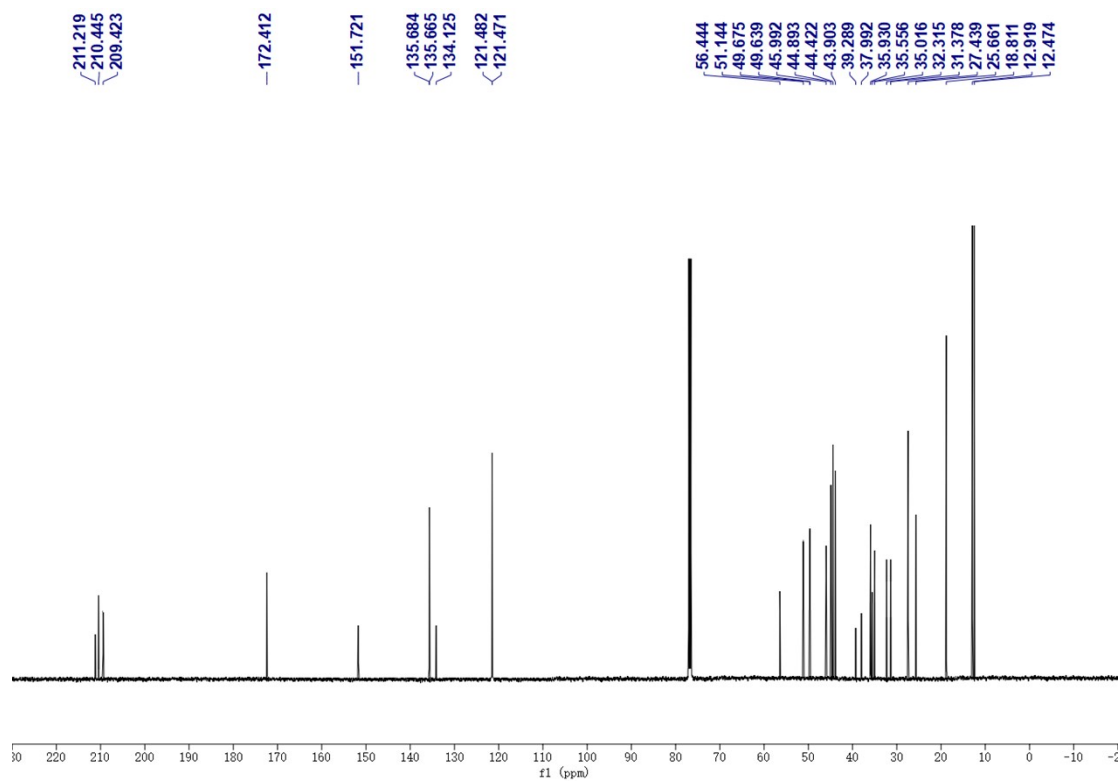

### 1w- $^{13}\text{C}$ NMR

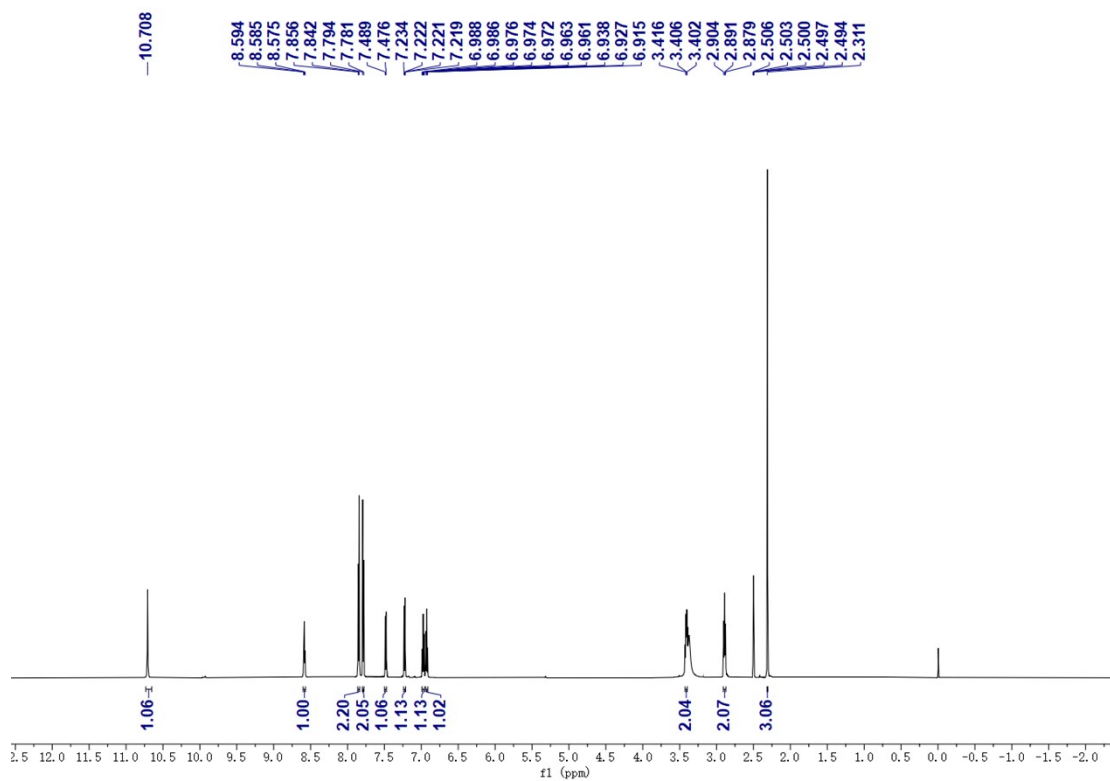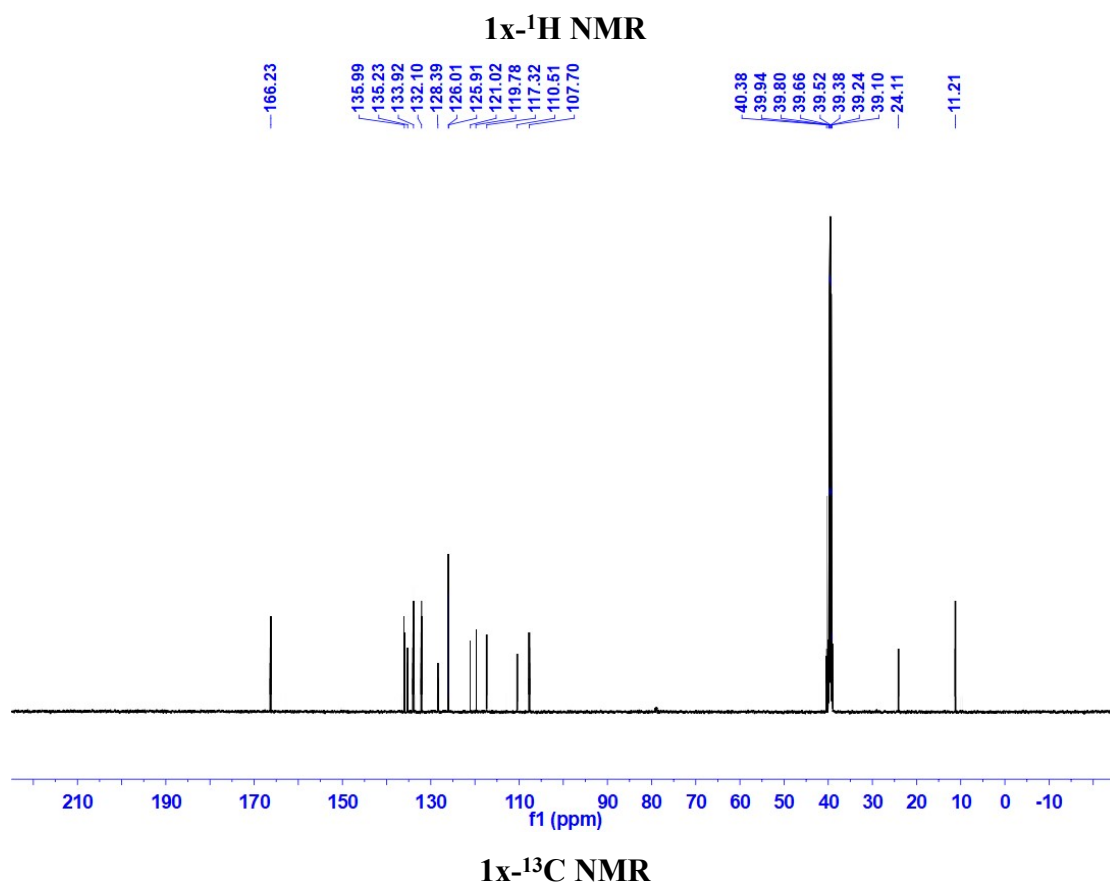



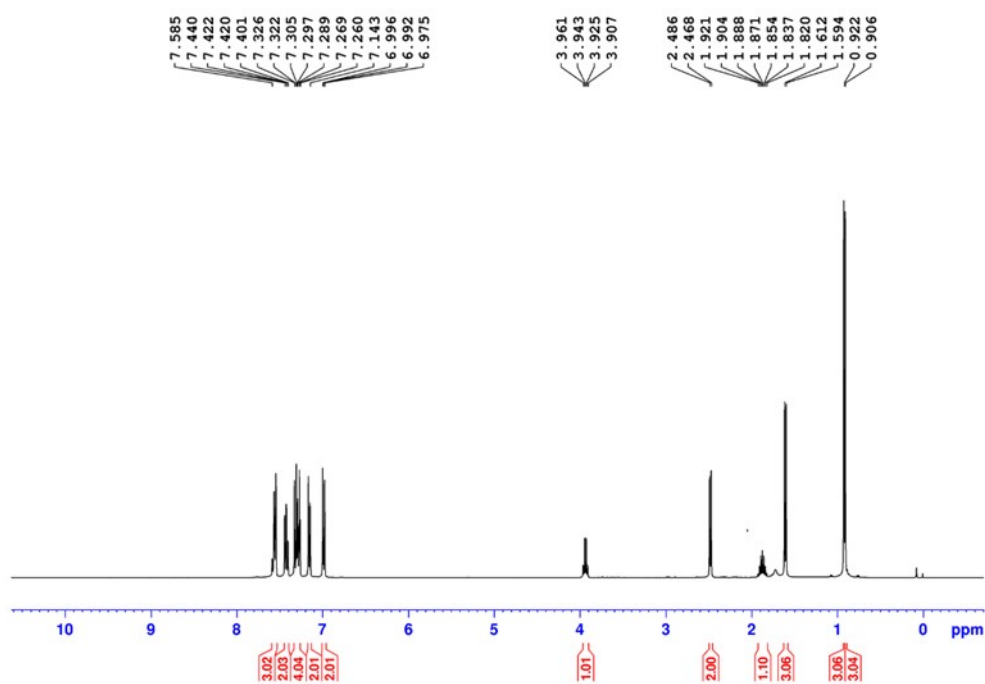

**2r-<sup>1</sup>H NMR**

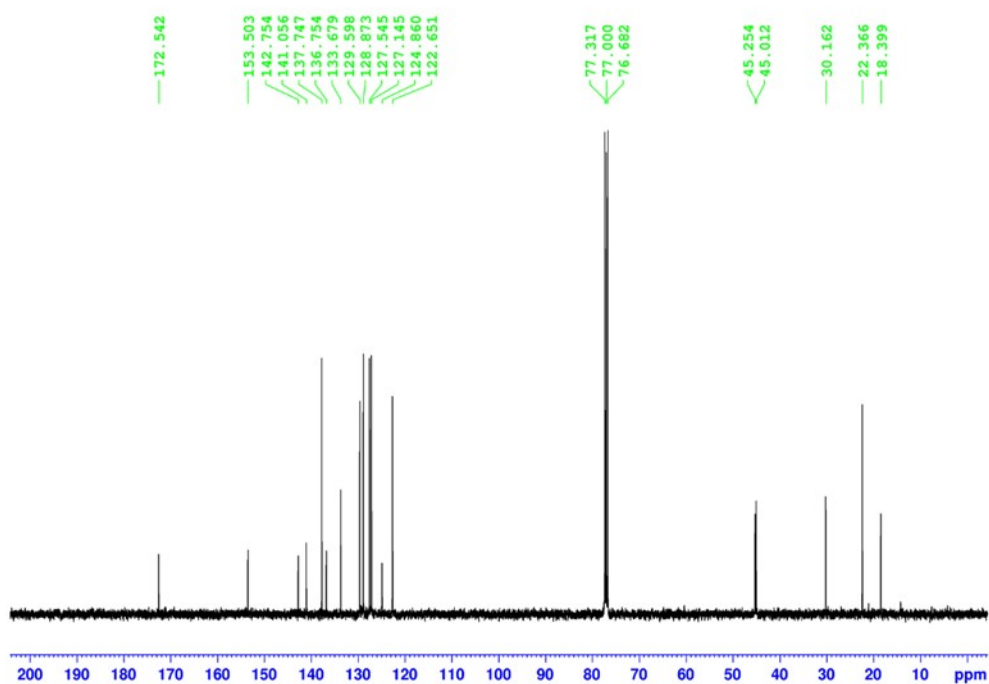

**2r-<sup>13</sup>C NMR**

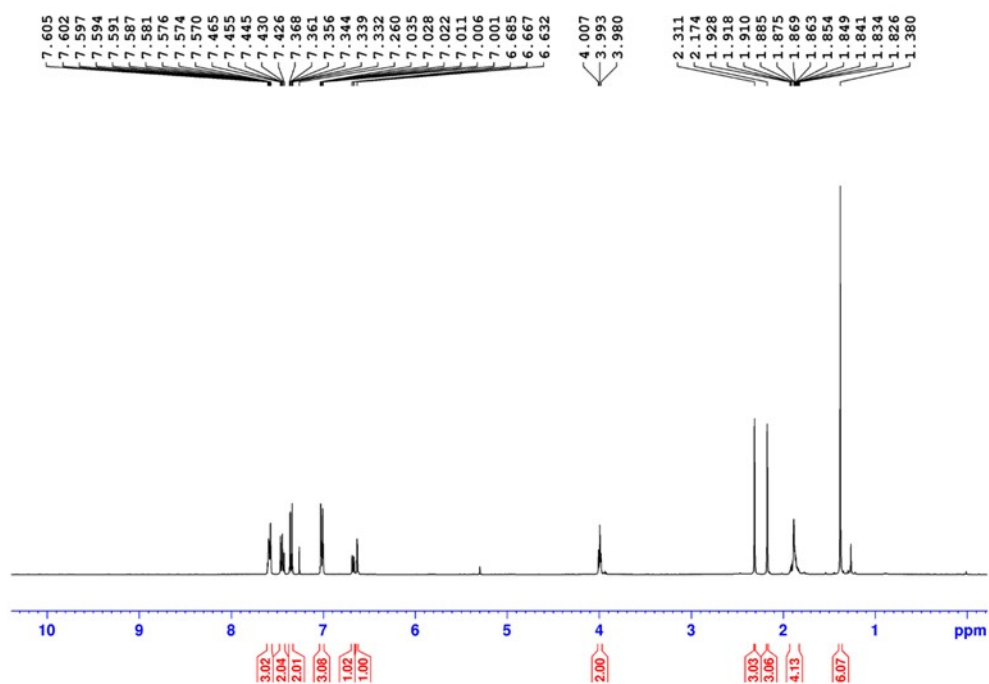

**2s- $^1\text{H}$  NMR**

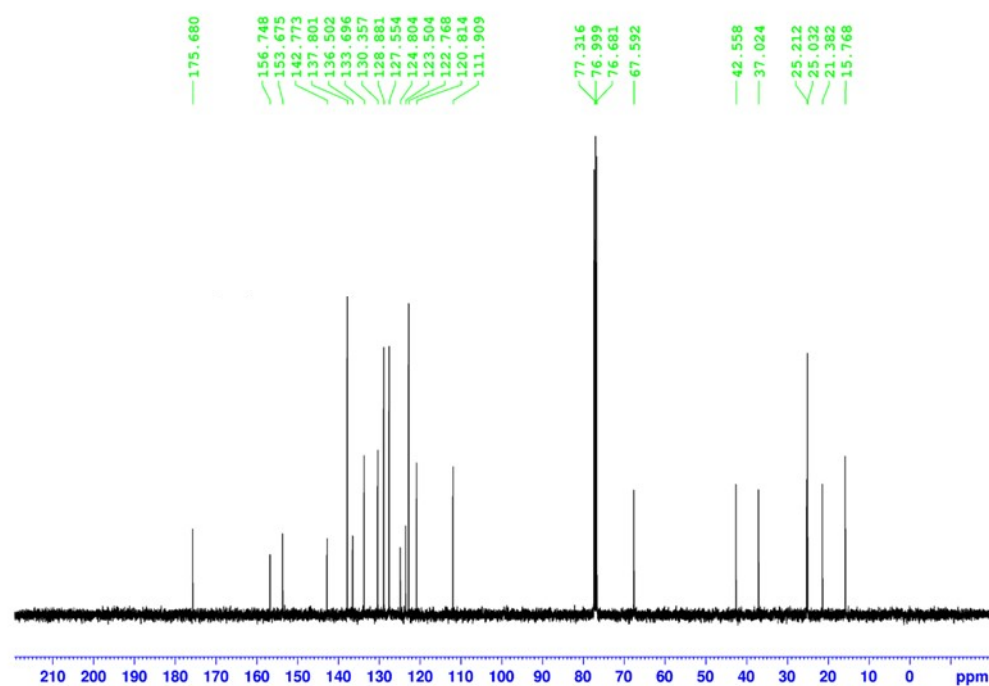

**2s- $^{13}\text{C}$  NMR**

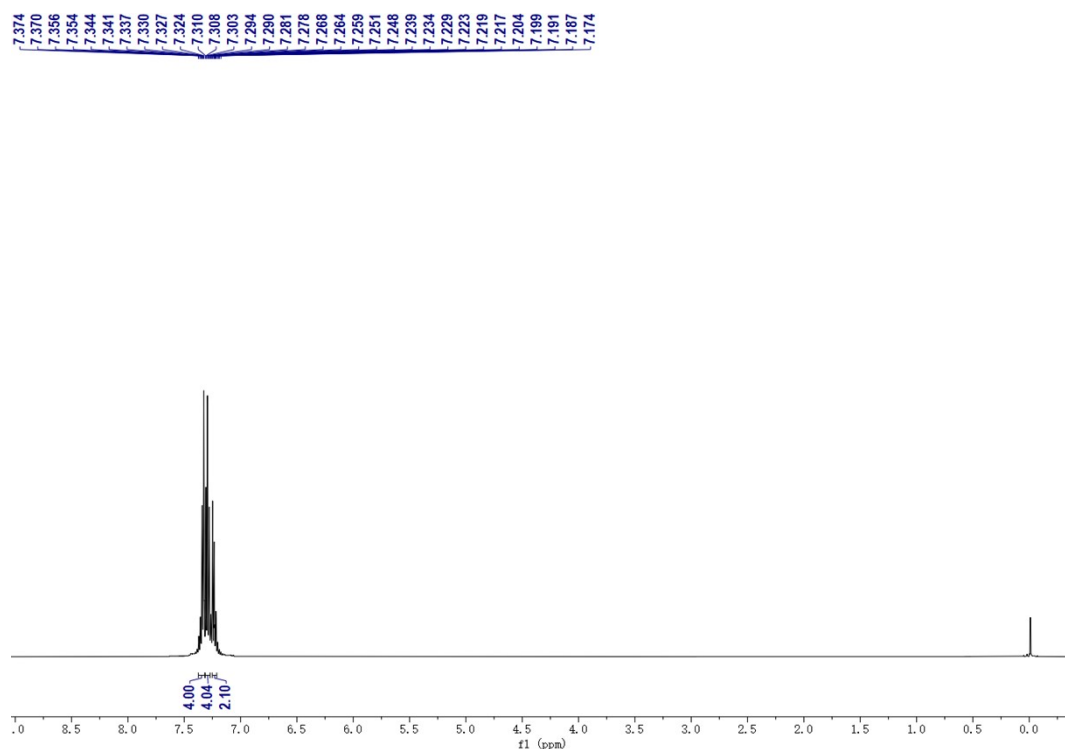

**3aa-<sup>1</sup>H NMR**

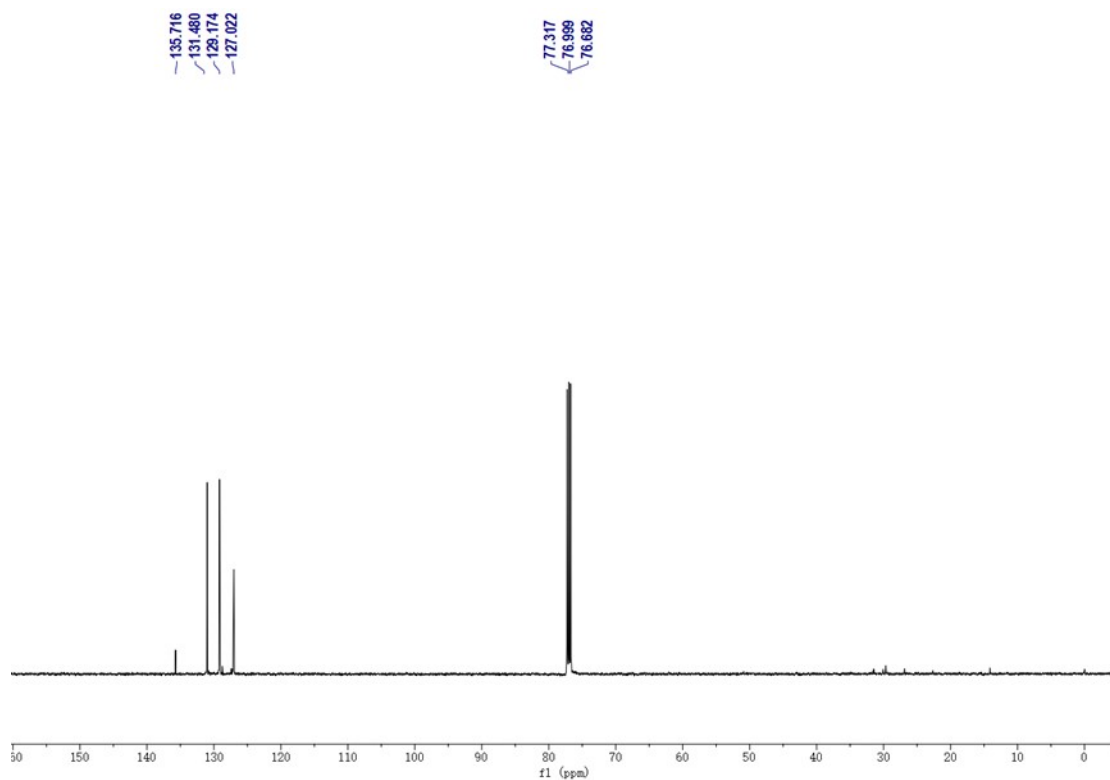

**3aa-<sup>13</sup>C NMR**

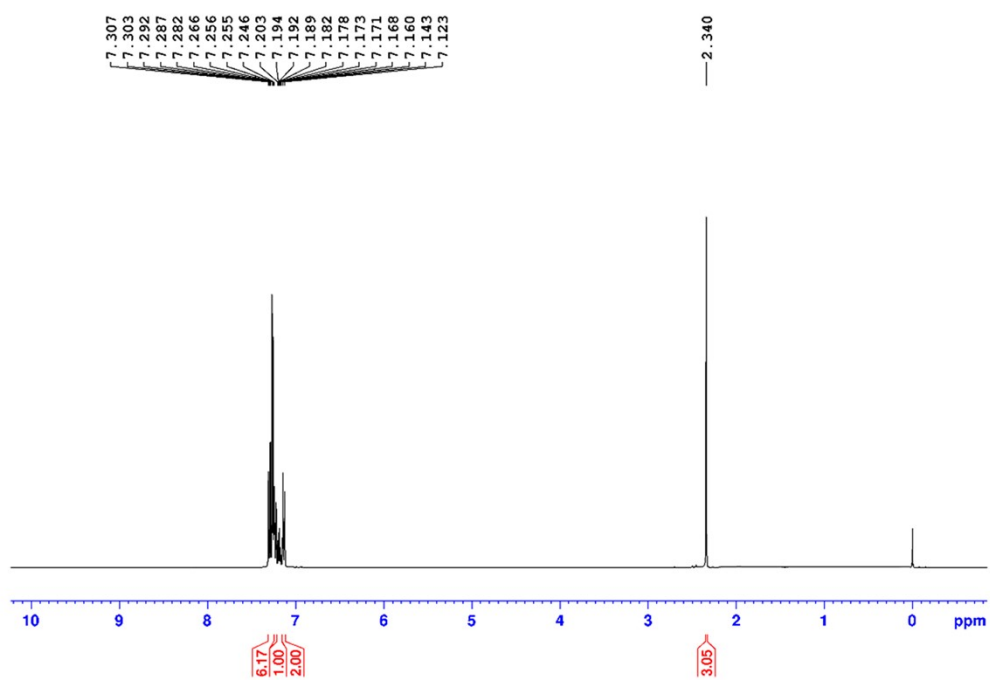

**3ab-<sup>1</sup>H NMR**

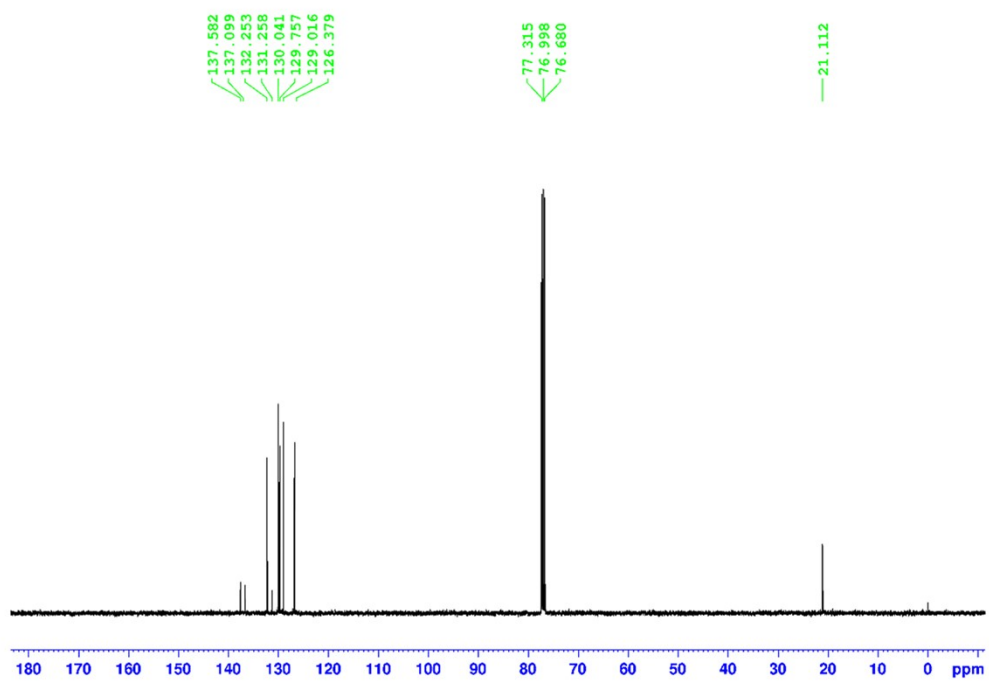

**3ab-<sup>13</sup>C NMR**

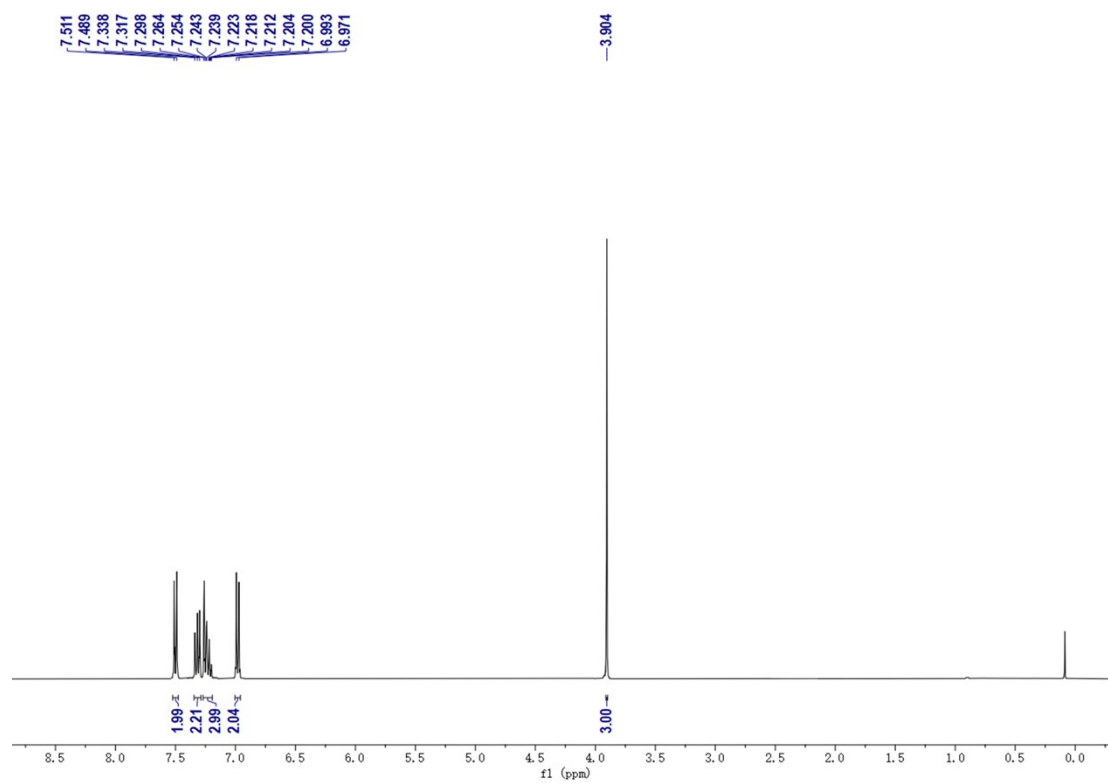

### 3ac-<sup>1</sup>H NMR

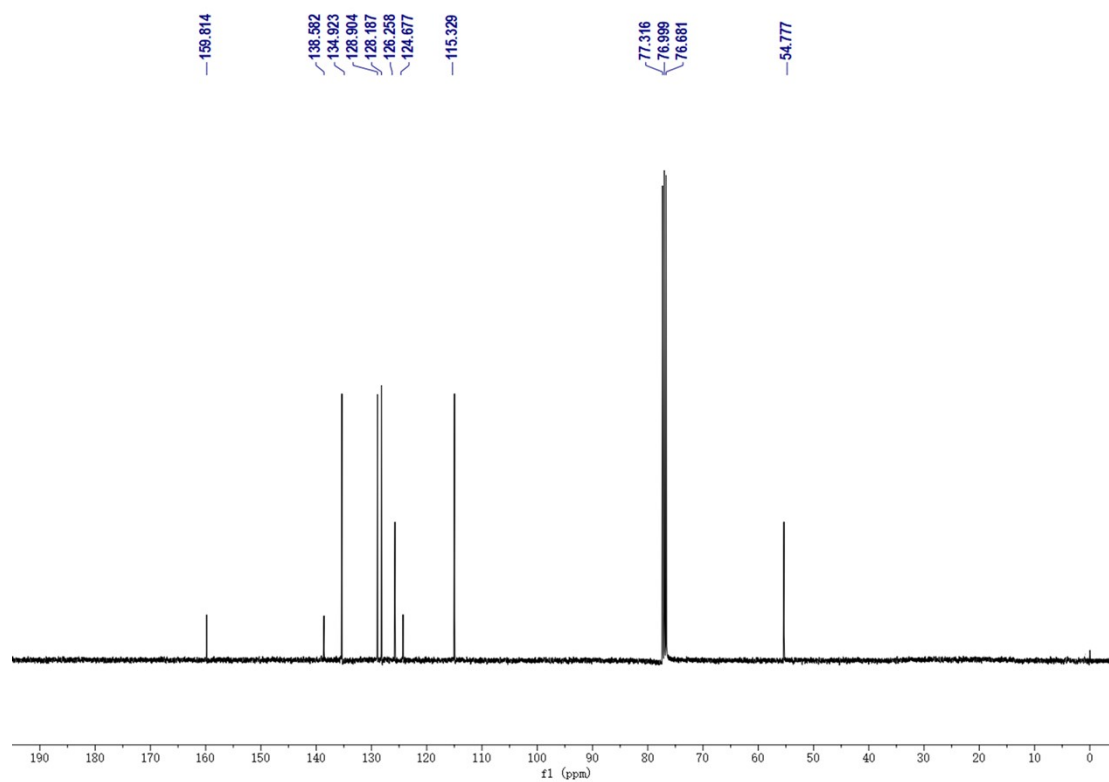

### 3ac-<sup>13</sup>C NMR

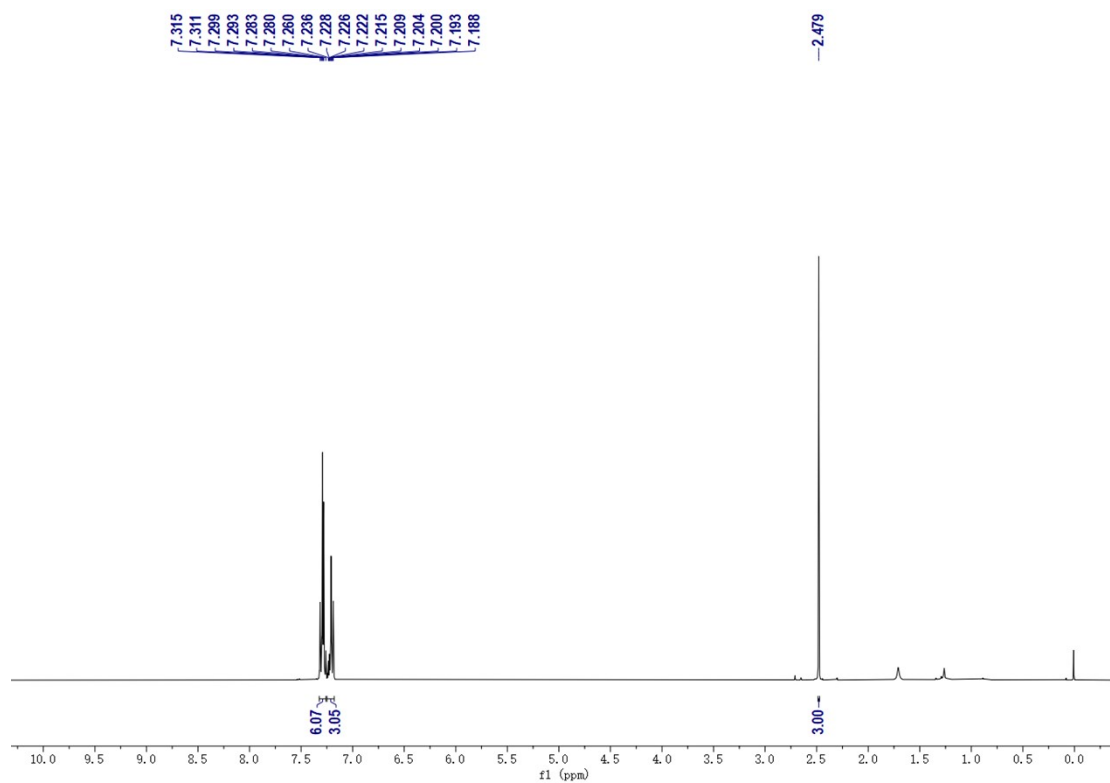

**3ad-<sup>1</sup>H NMR**

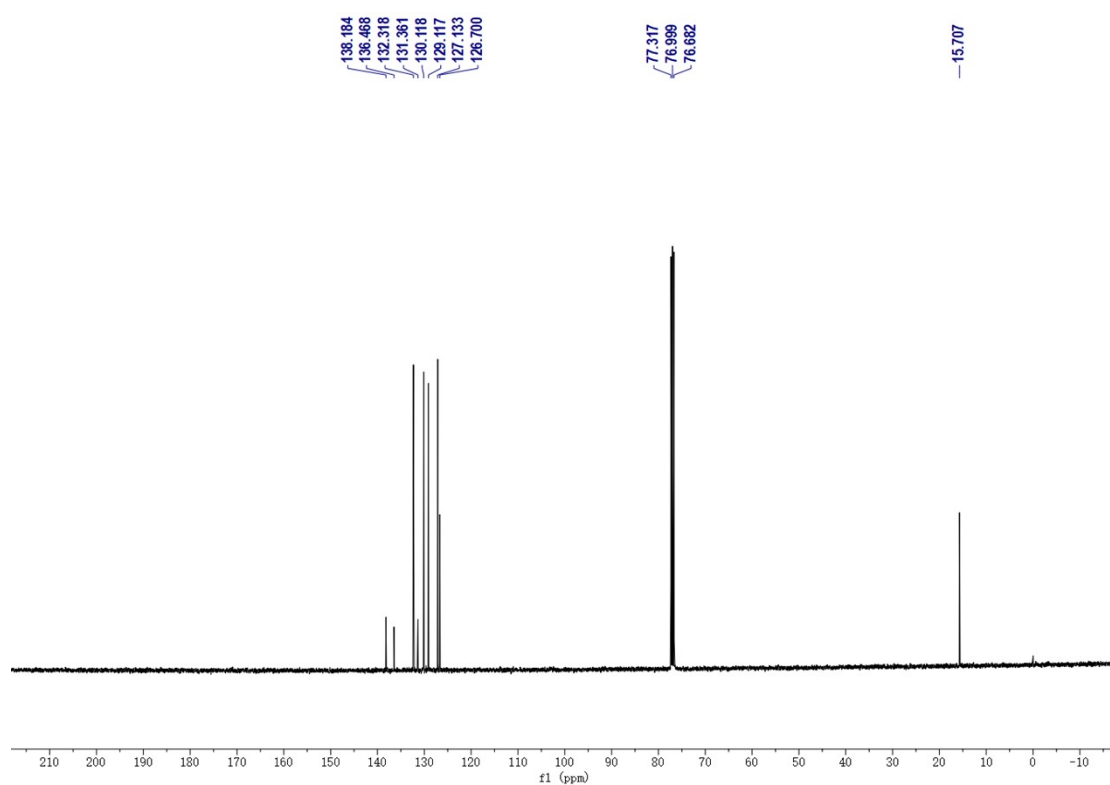

**3ad-<sup>13</sup>C NMR**

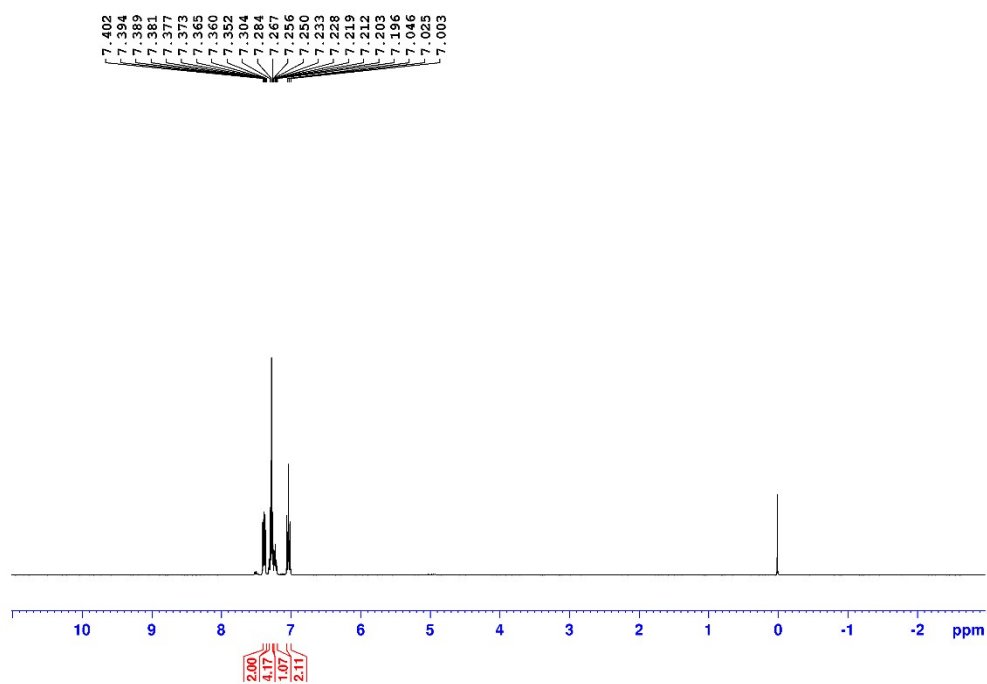

**3ae-<sup>1</sup>H NMR**

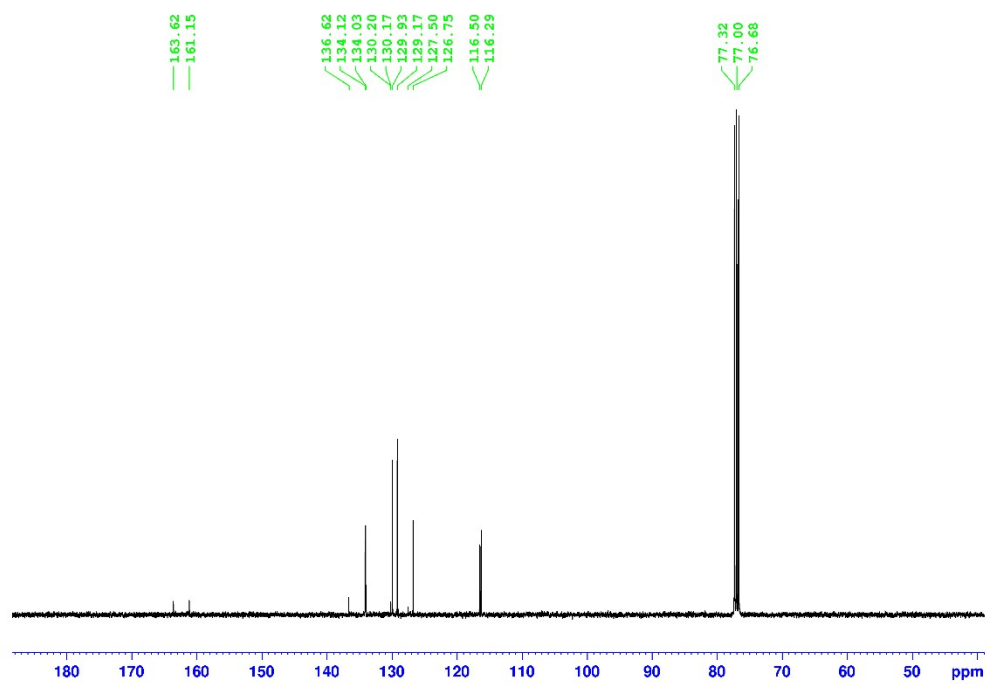

**3ae-<sup>13</sup>C NMR**

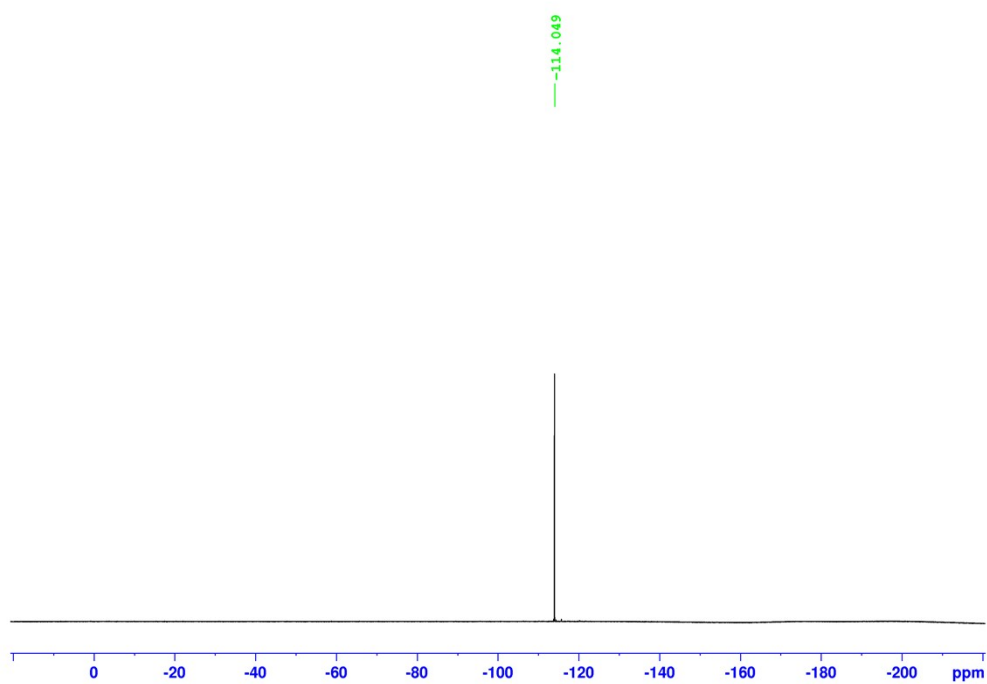

**3ae-<sup>19</sup>F NMR**

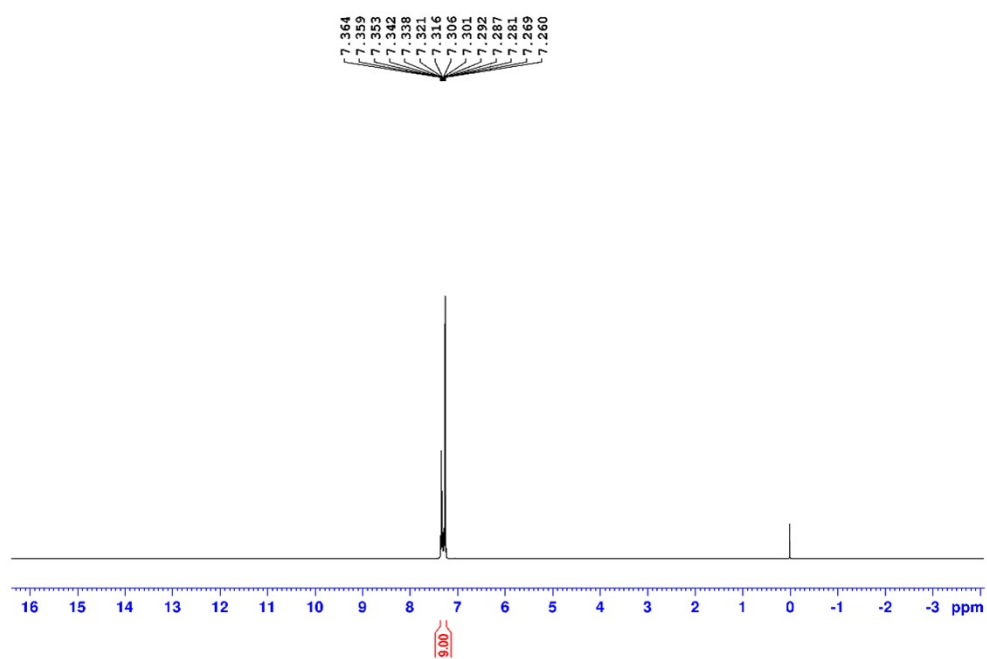

**3af-<sup>1</sup>H NMR**



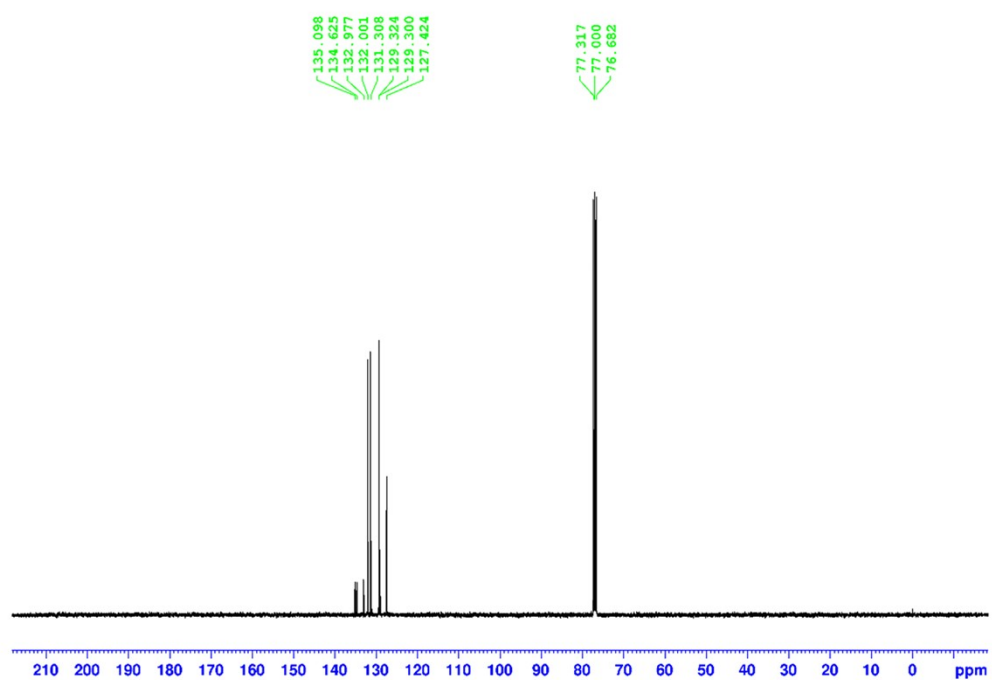

**3af-<sup>13</sup>C NMR**

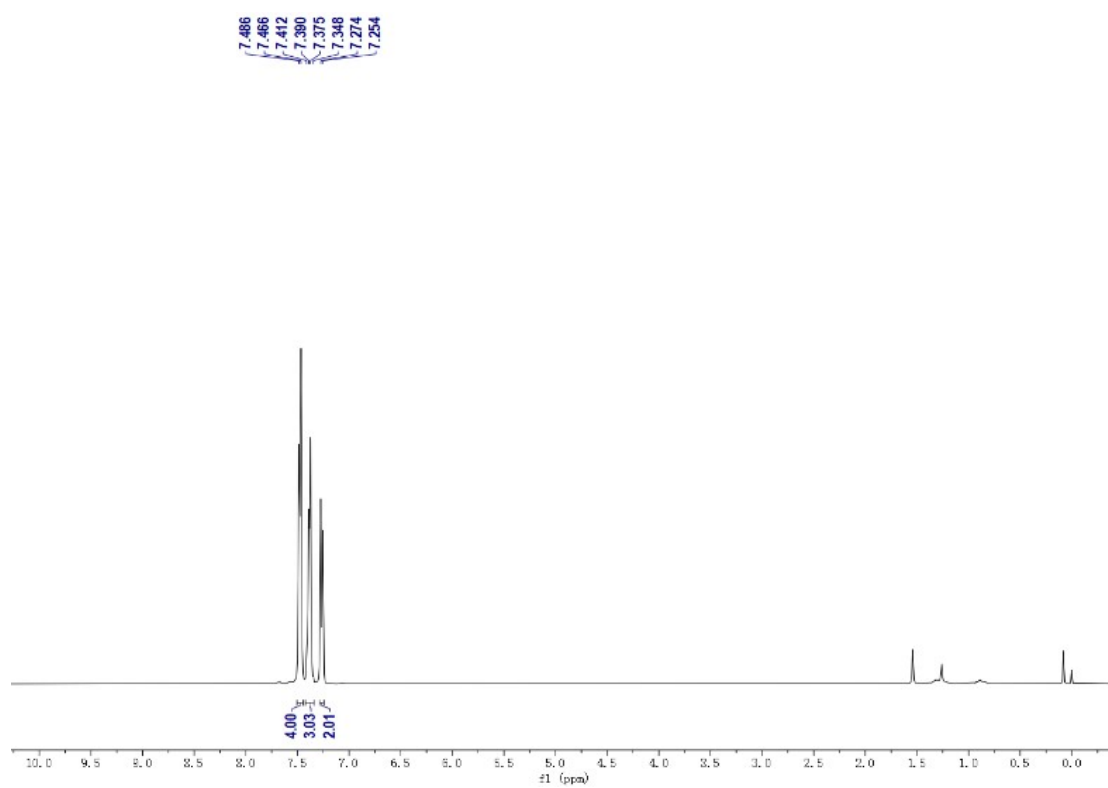

**3ag-<sup>1</sup>H NMR**

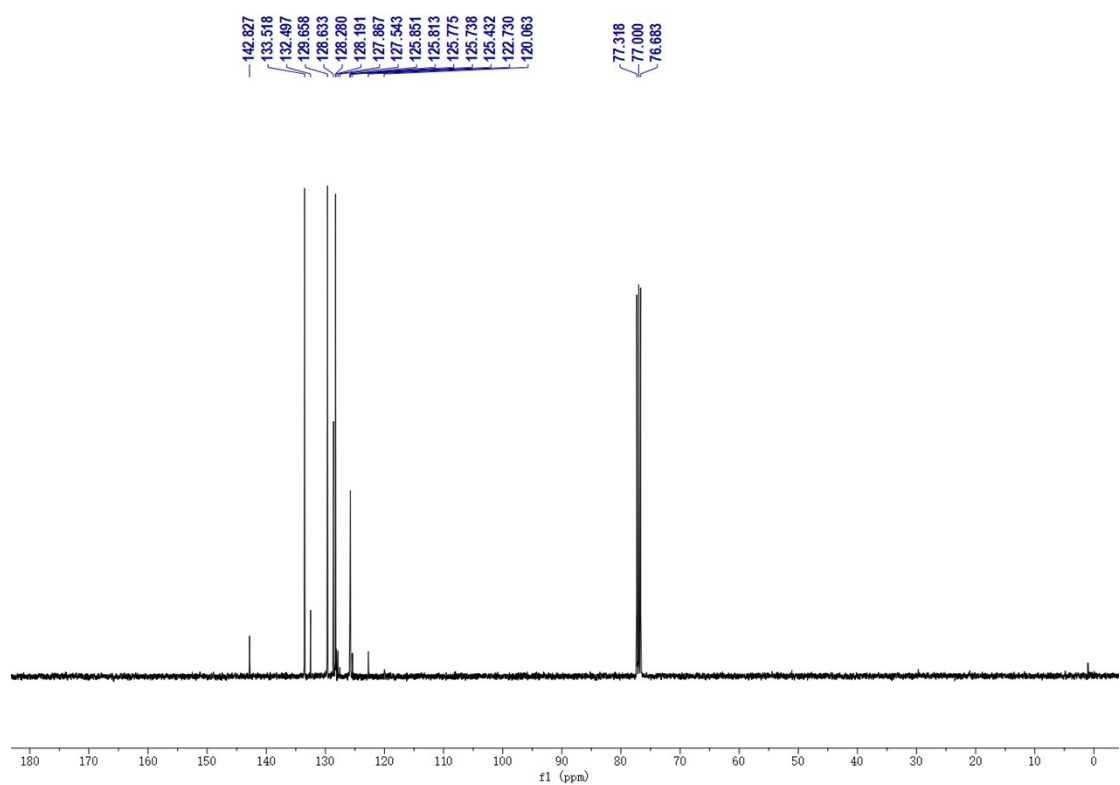

**3ag-<sup>13</sup>C NMR**

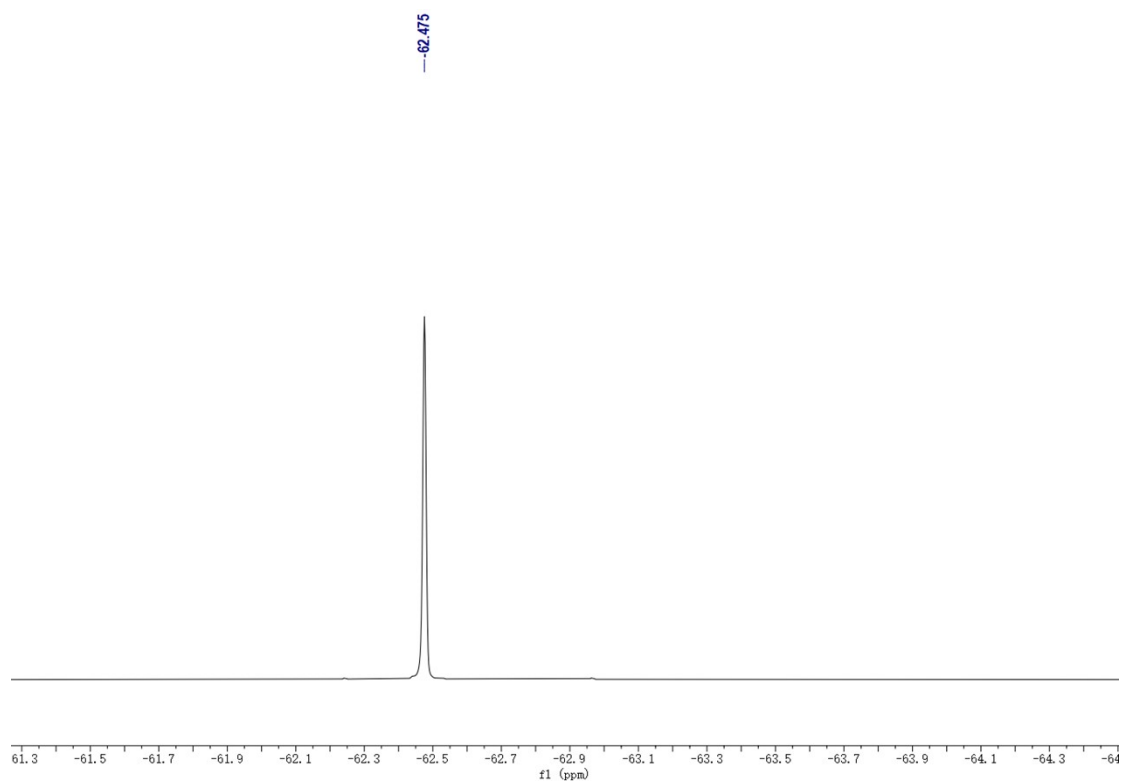

**3ag-<sup>19</sup>F NMR**

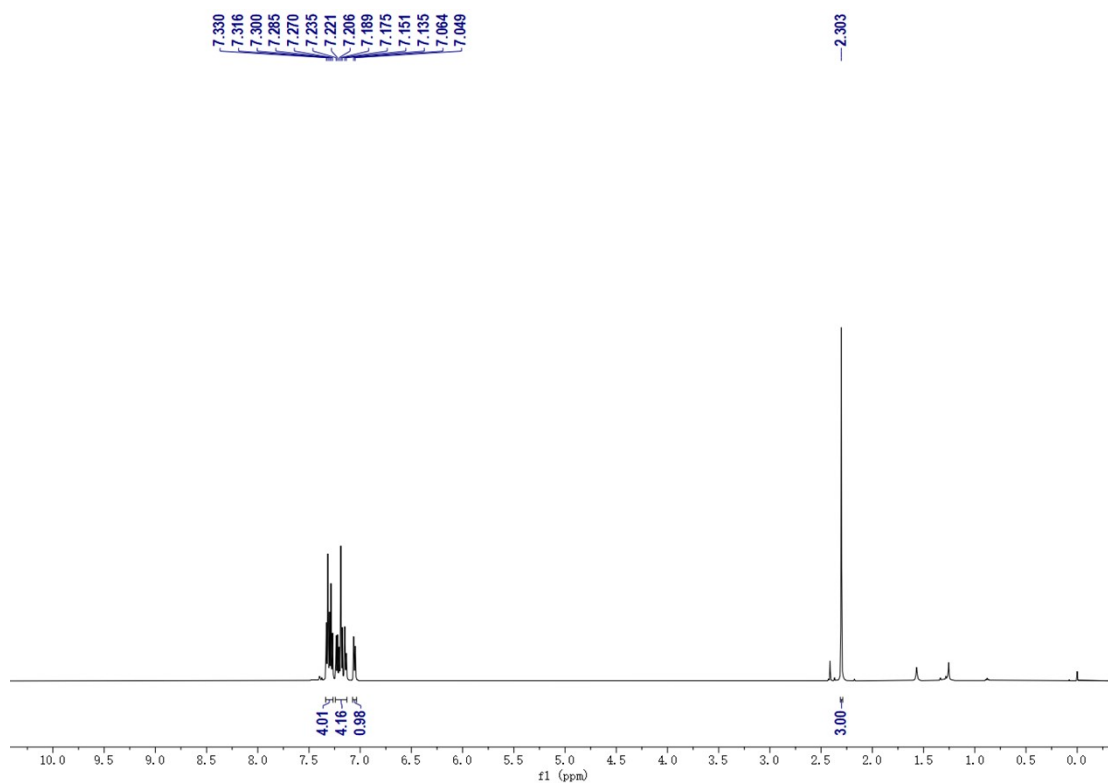

**3ah-<sup>1</sup>H NMR**

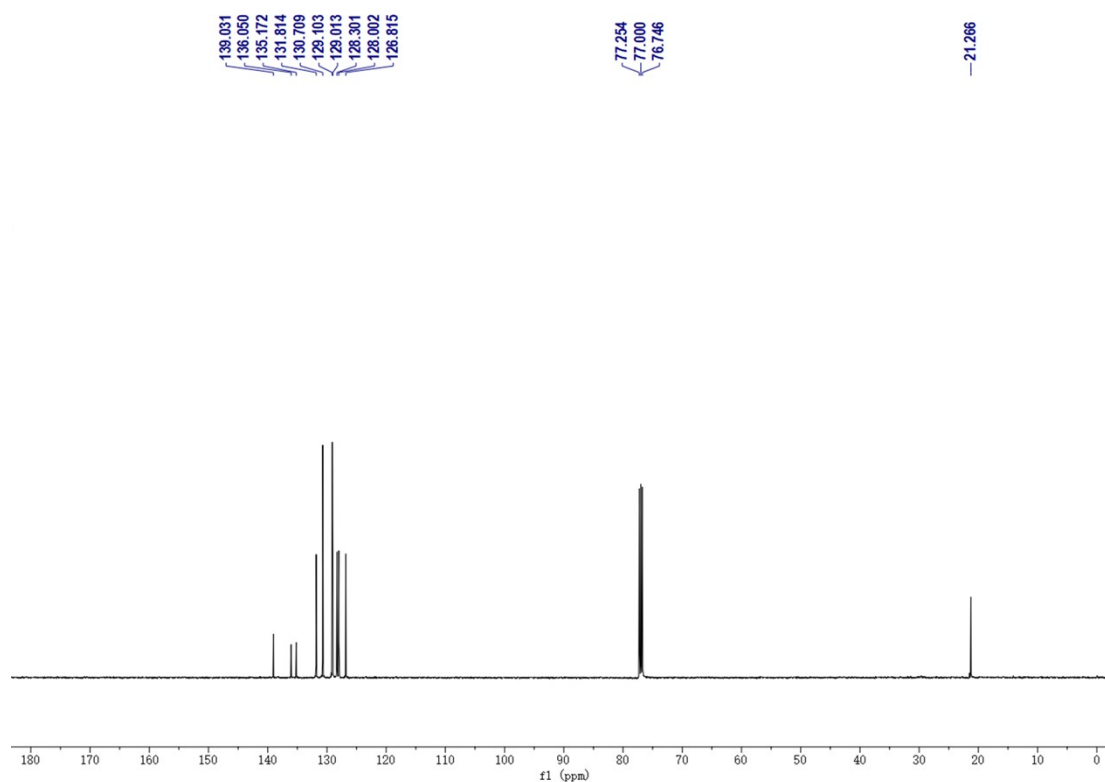

**3ah-<sup>13</sup>C NMR**

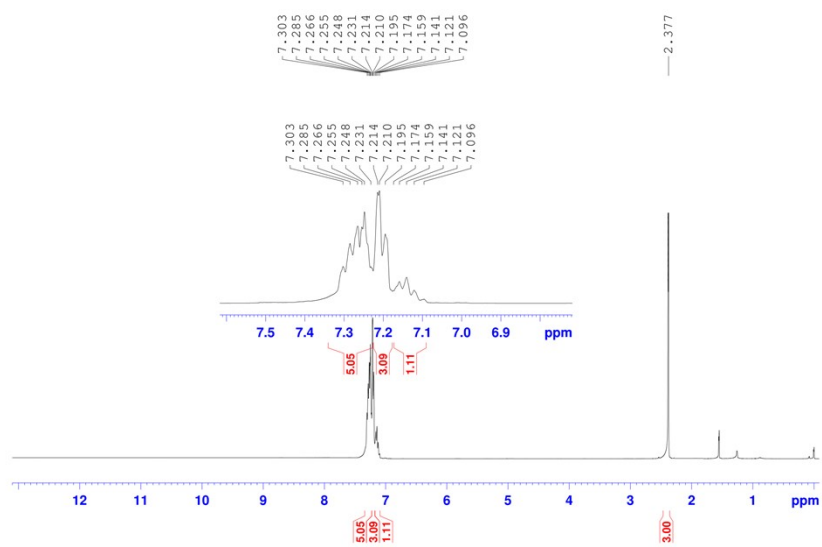

**3ai-<sup>1</sup>H NMR**

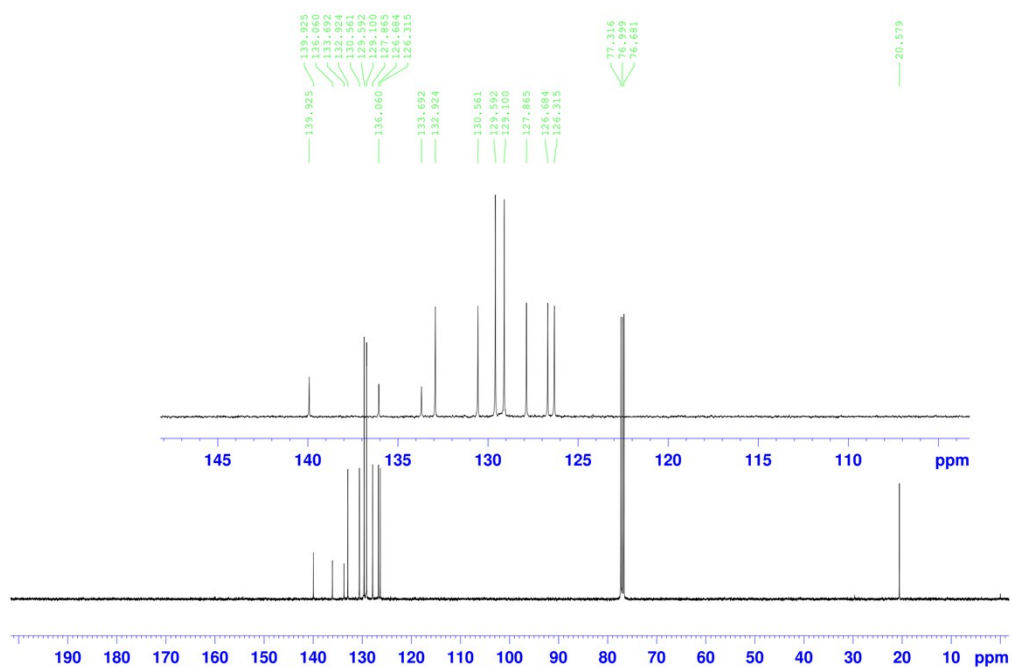

**3ai-<sup>13</sup>C NMR**

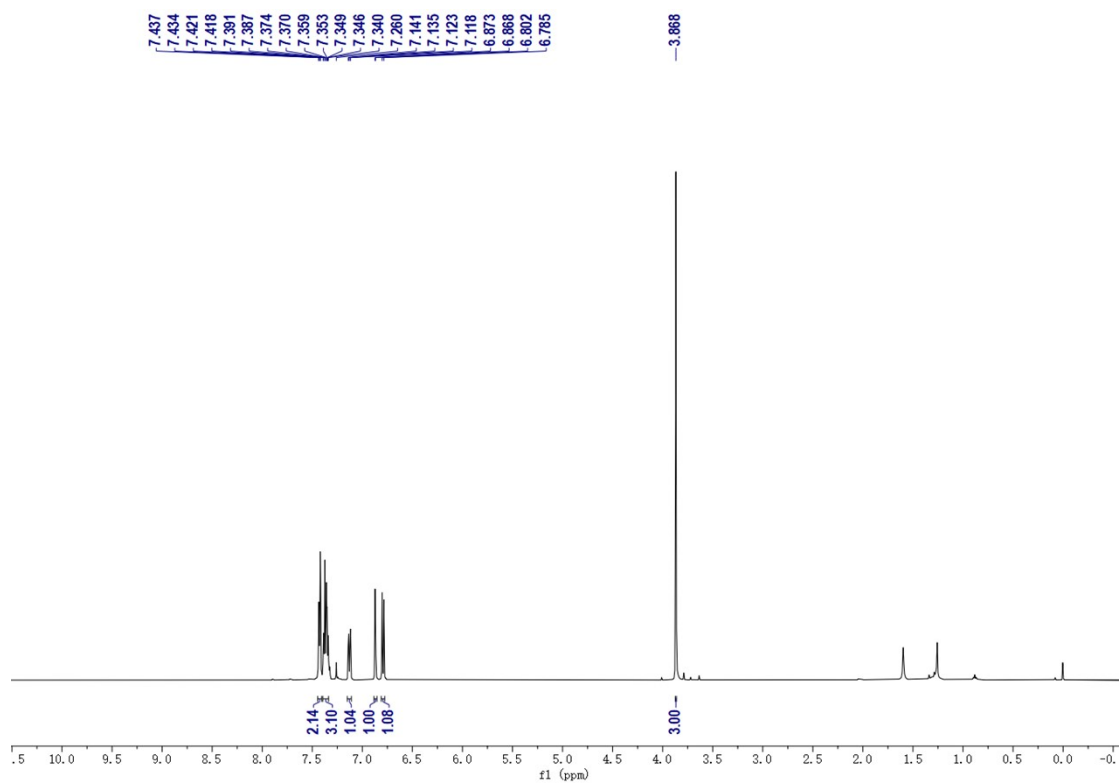

### 3aj-<sup>1</sup>H NMR

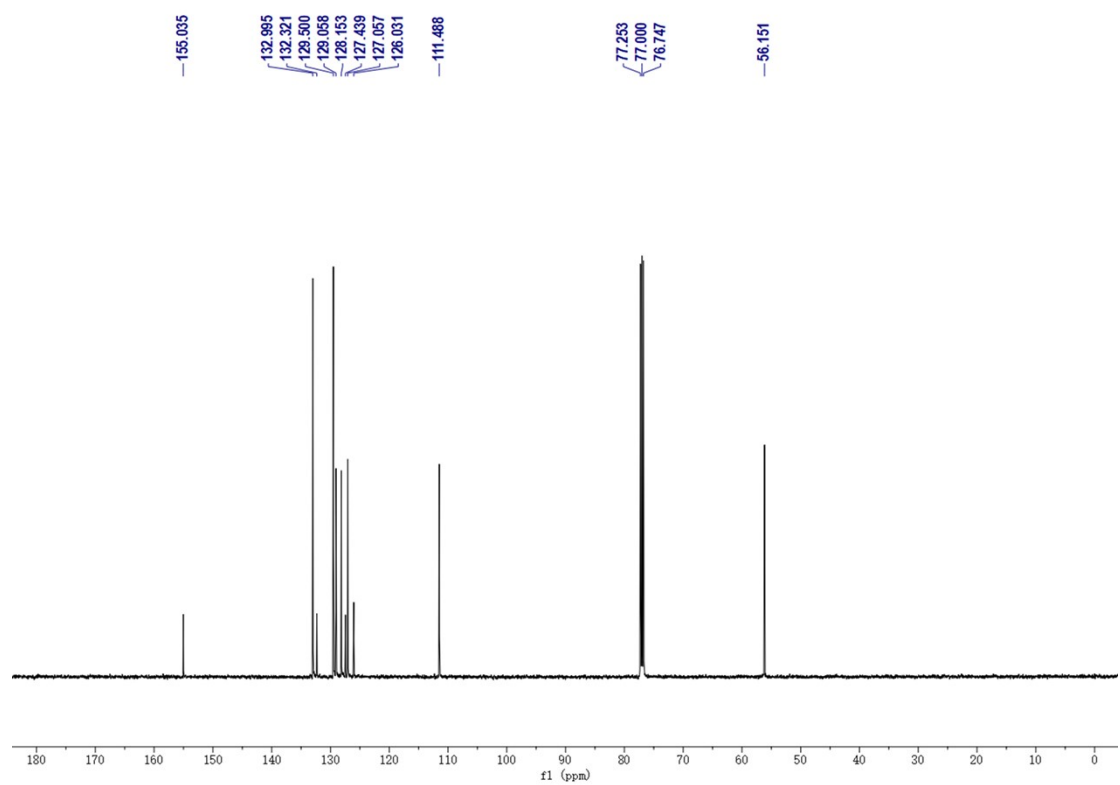

### 3aj-<sup>13</sup>C NMR

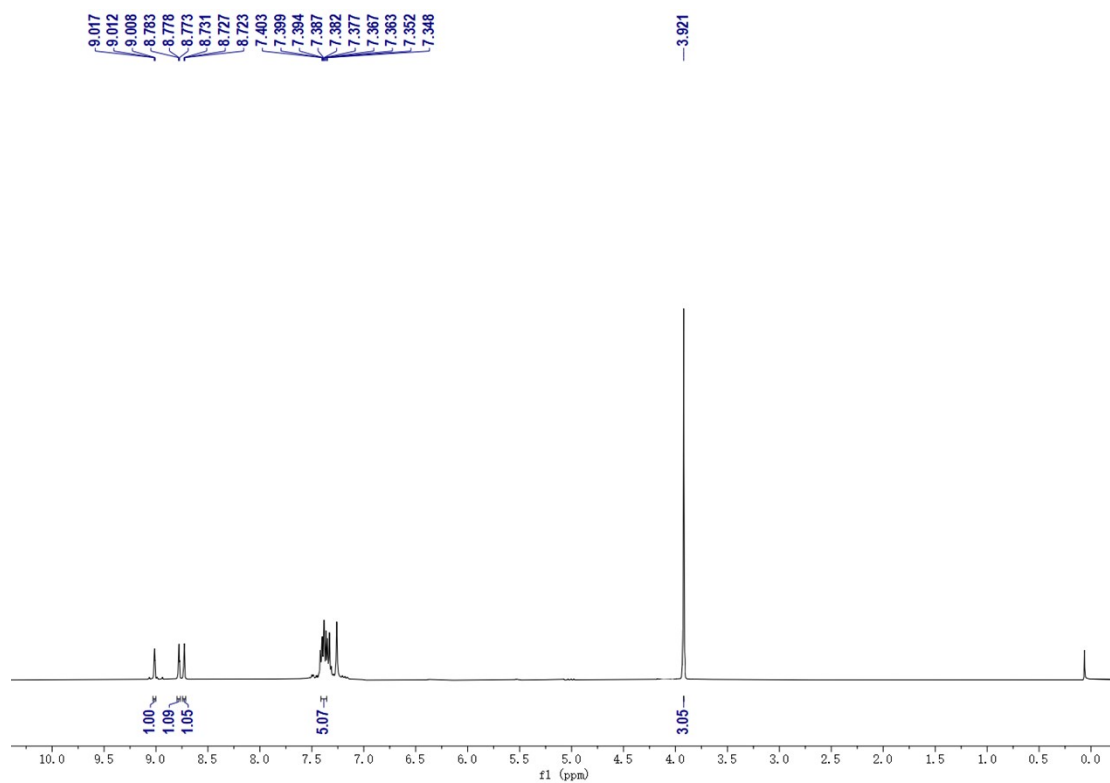

### 3ak-<sup>1</sup>H NMR

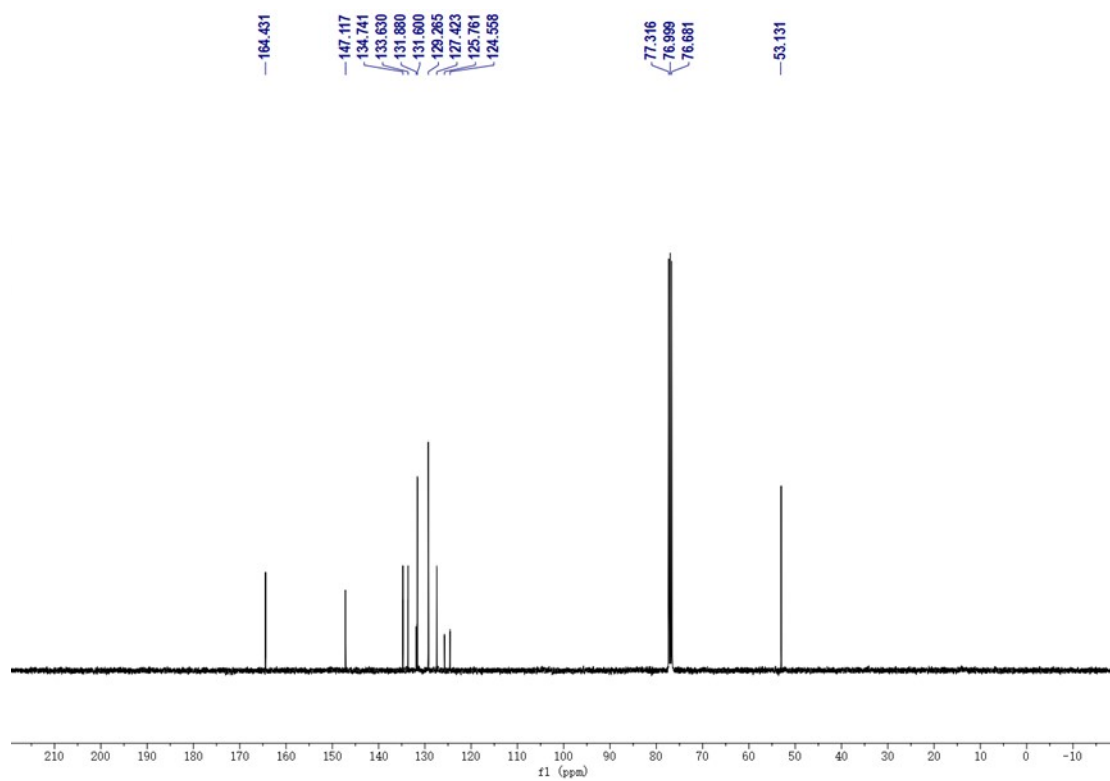

### 3ak-<sup>13</sup>C NMR

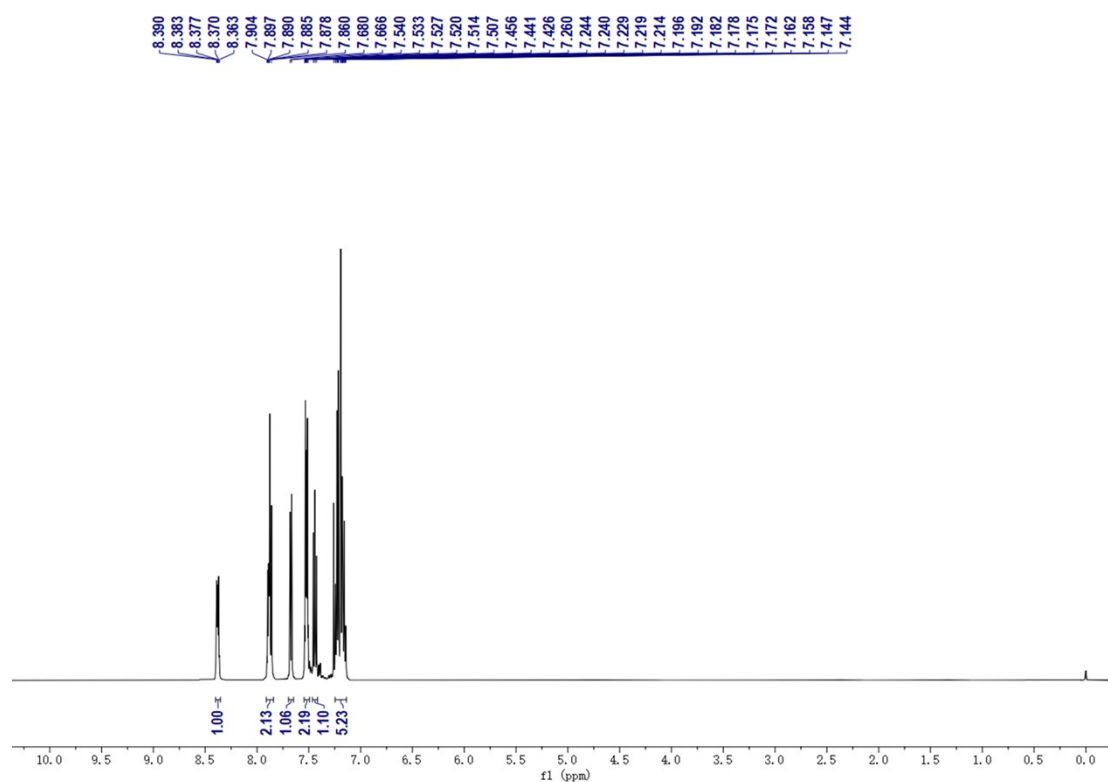

### 3aI-<sup>1</sup>H NMR

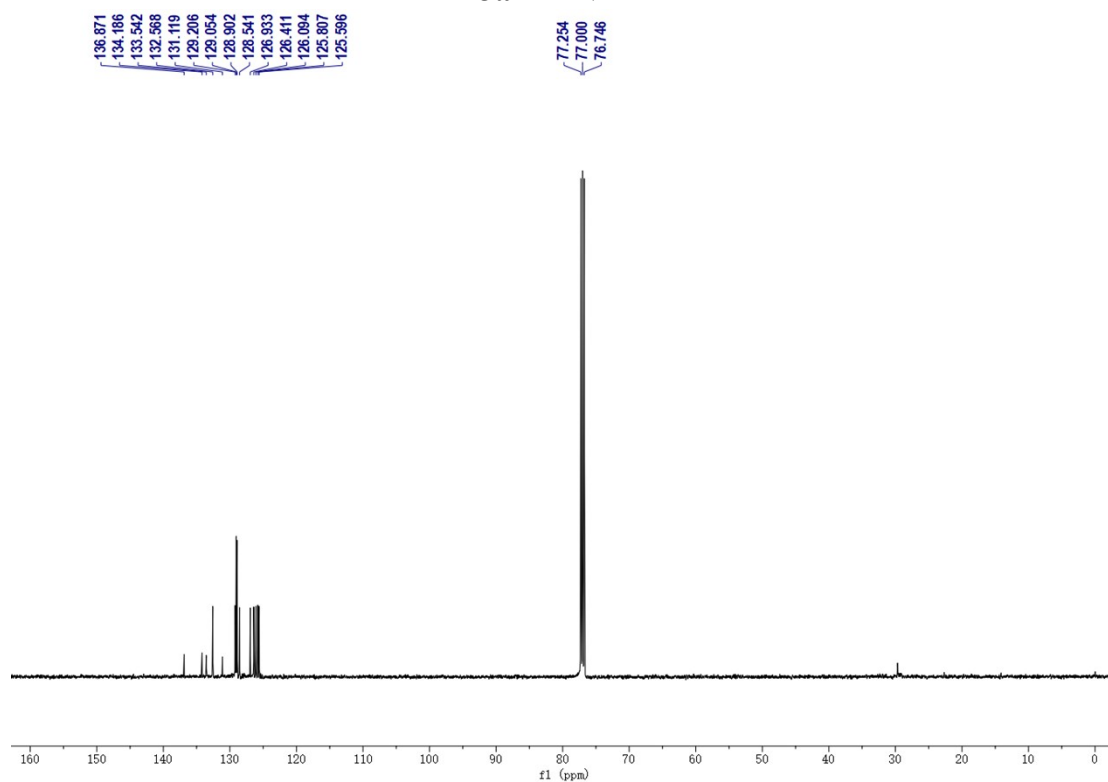

### 3aI-<sup>13</sup>C NMR

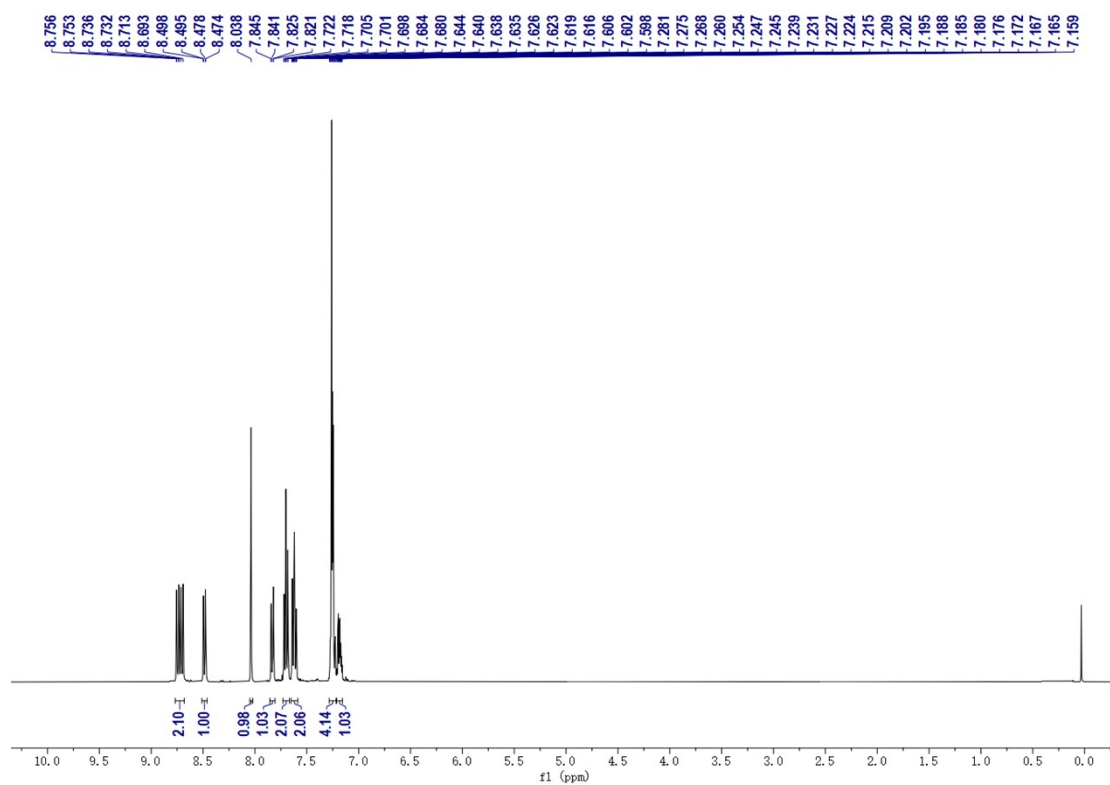

**3am- $^1\text{H}$  NMR**

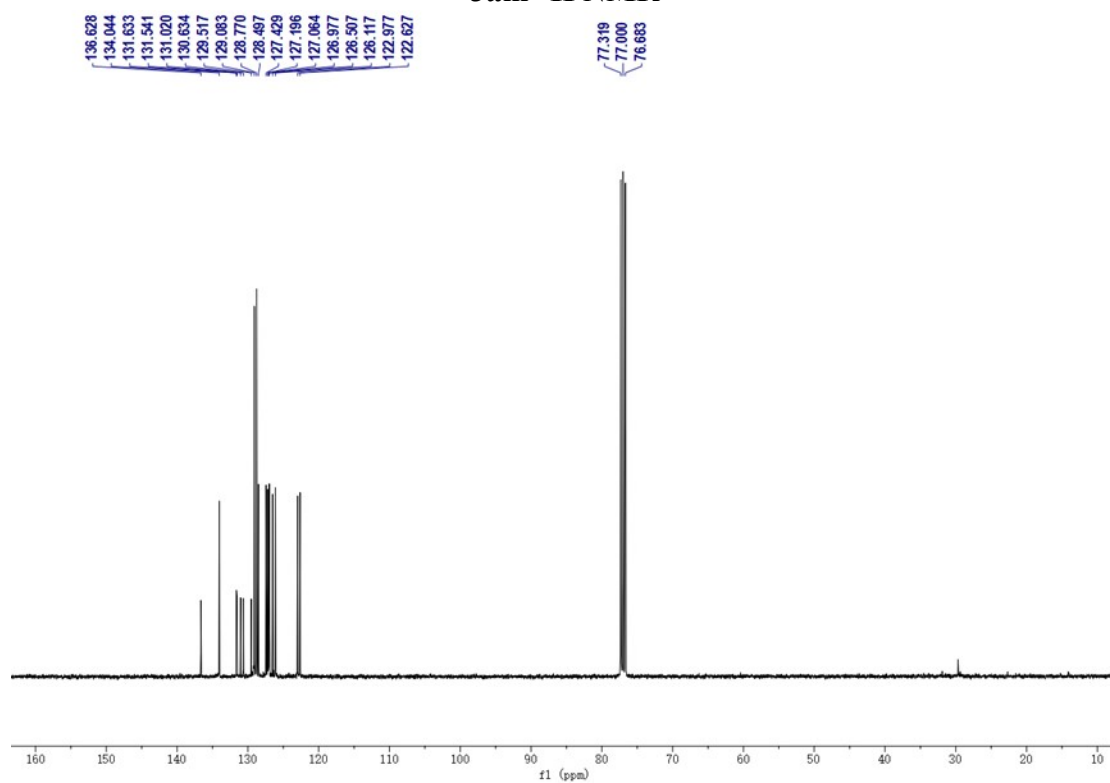

**3am- $^{13}\text{C}$  NMR**



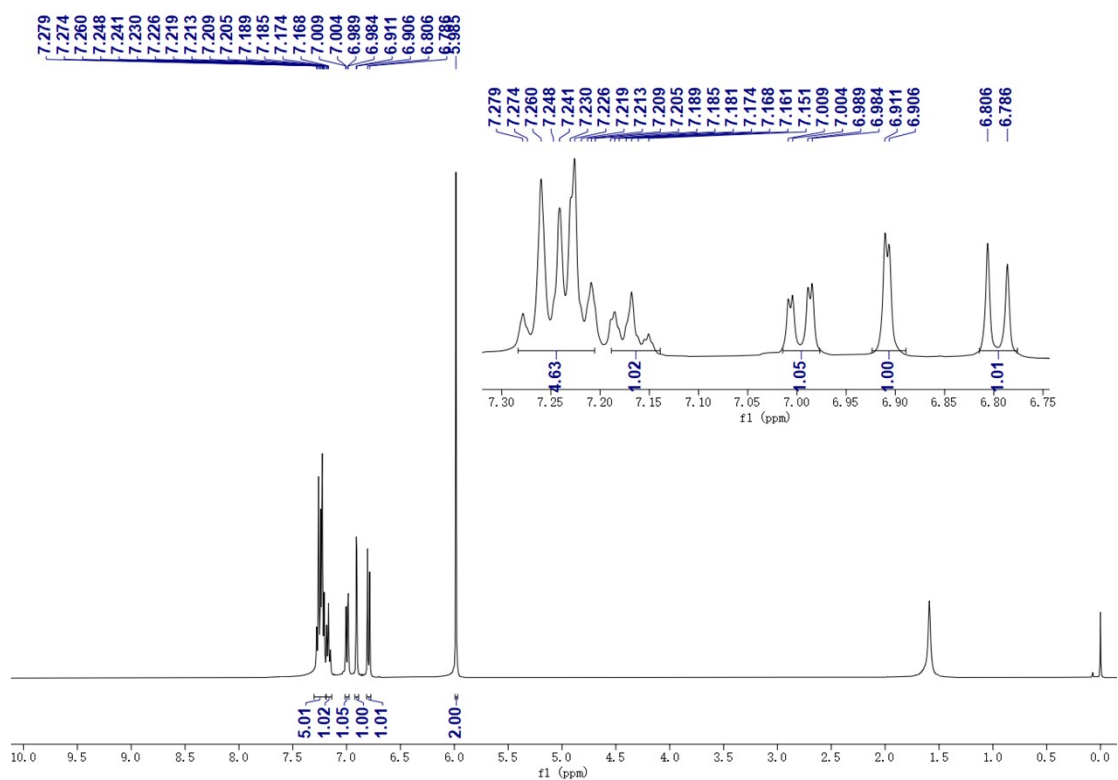

### 3an- $^1\text{H}$ NMR

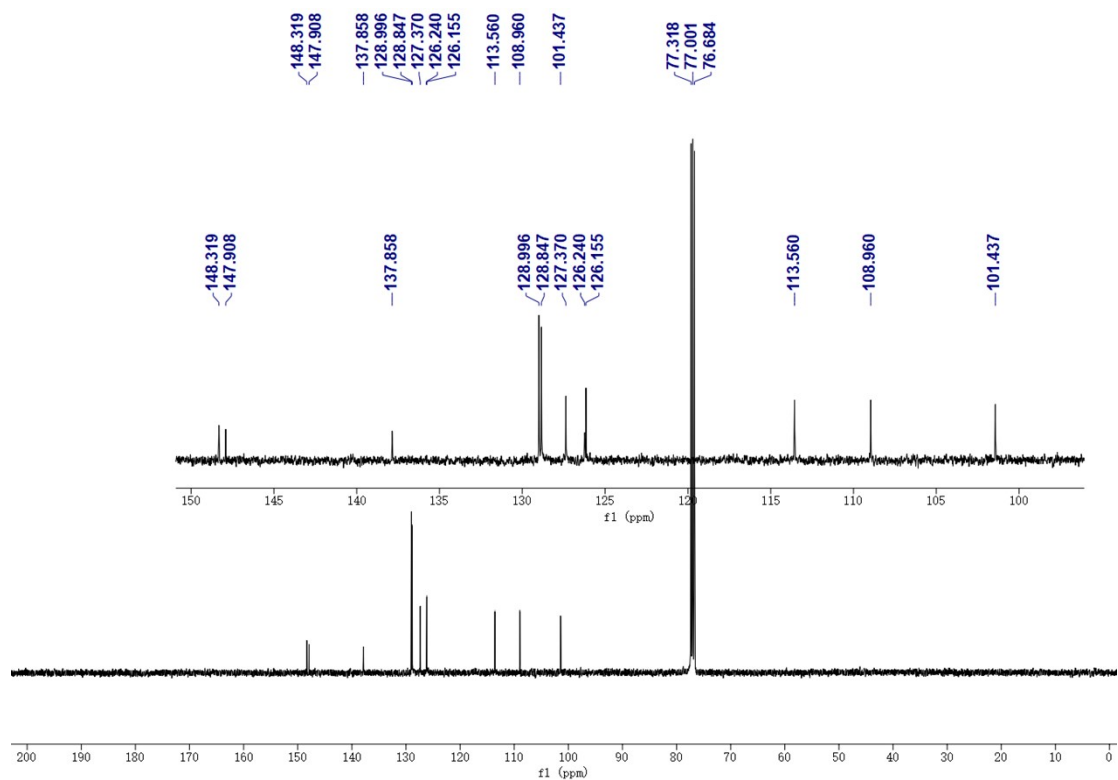

### 3an- $^{13}\text{C}$ NMR

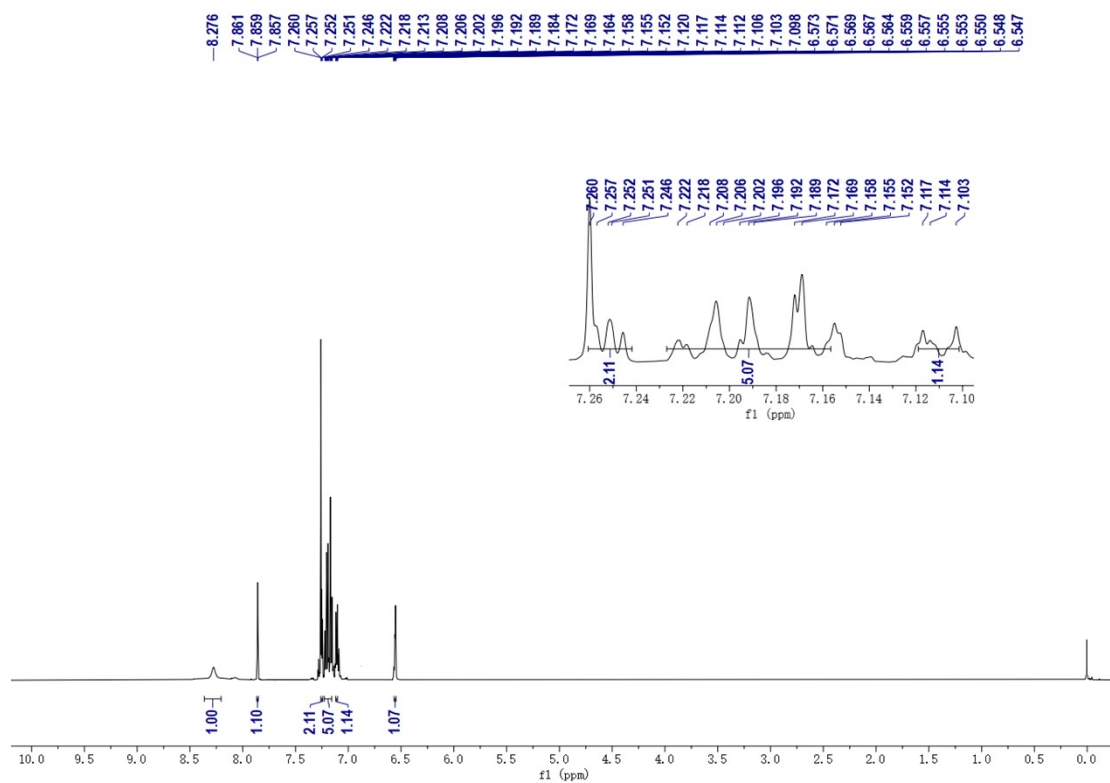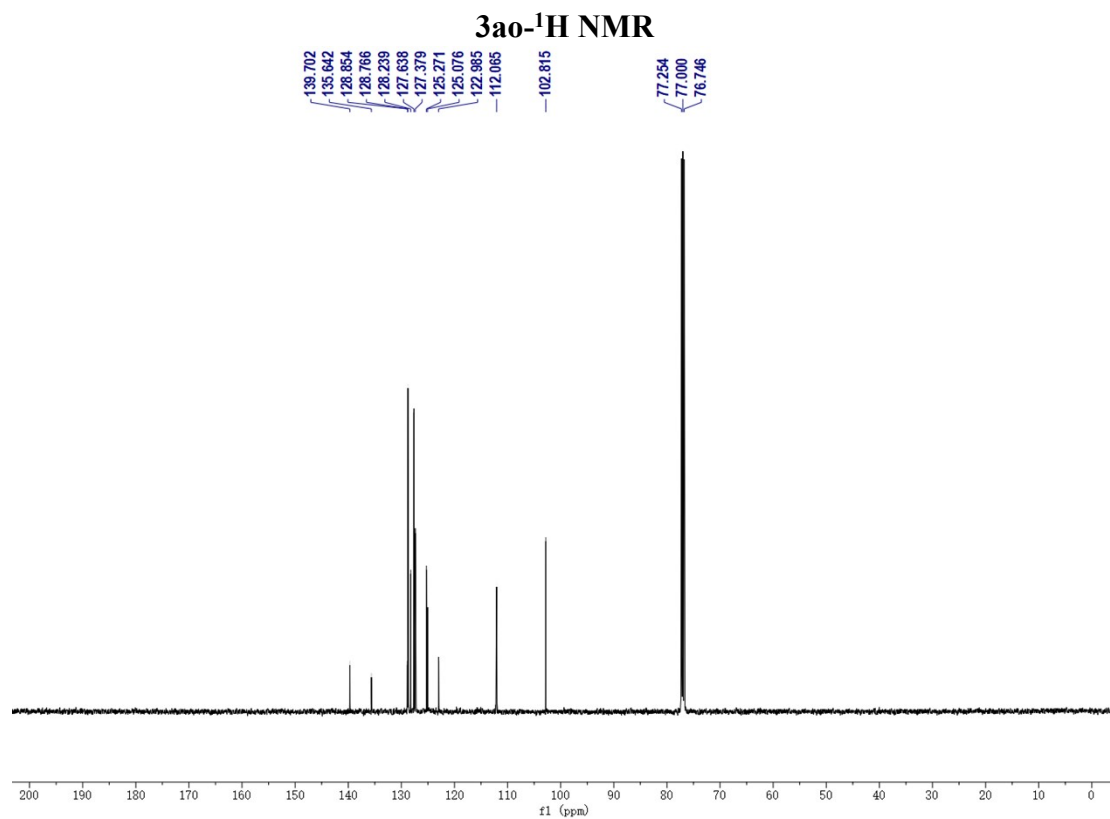

**$^{13}\text{C}$  NMR**

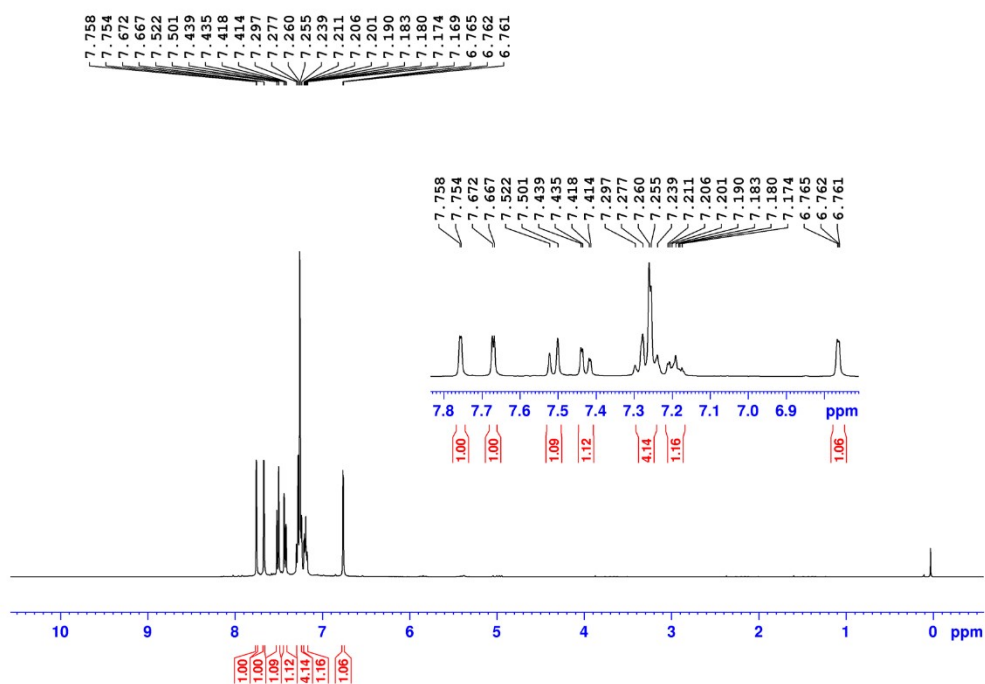

**3ap-<sup>1</sup>H NMR**

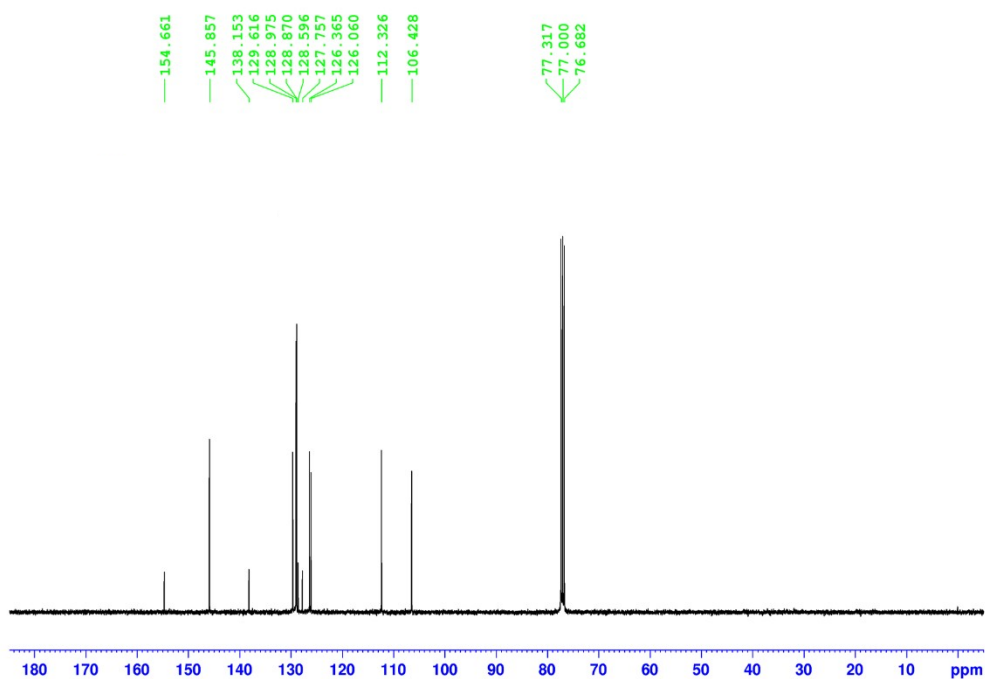

**3ap-<sup>13</sup>C NMR**

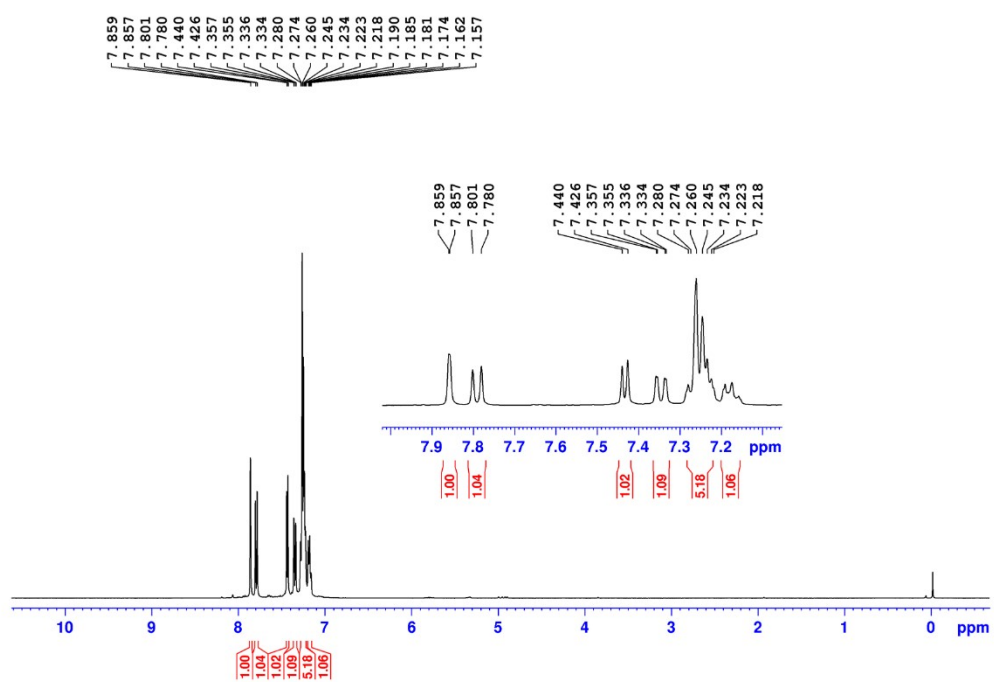

**3aq-<sup>1</sup>H NMR**

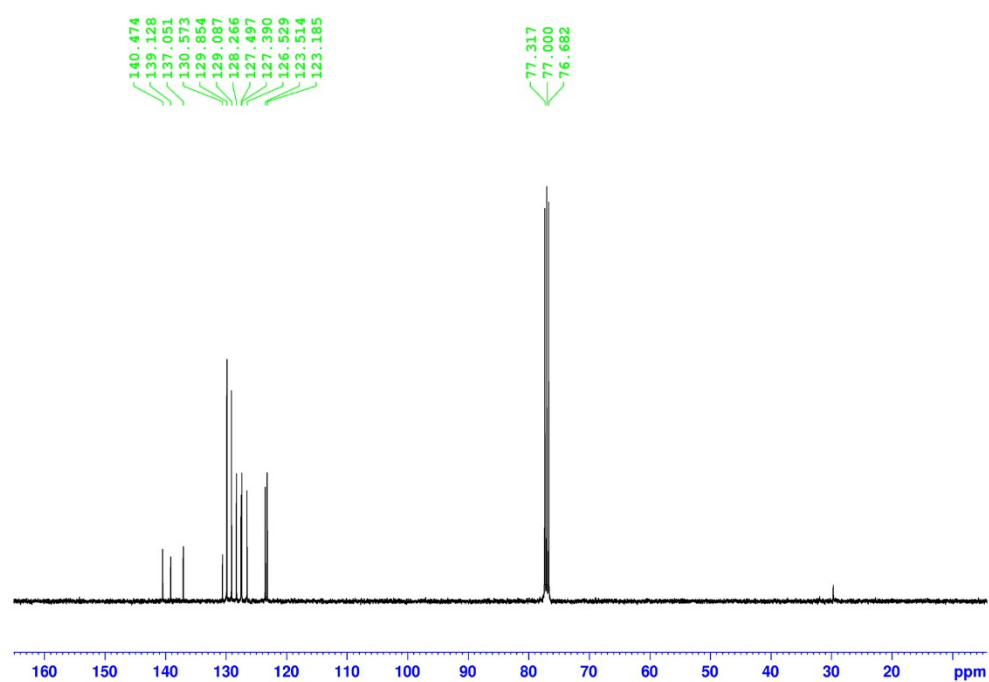

**3aq-<sup>13</sup>C NMR**

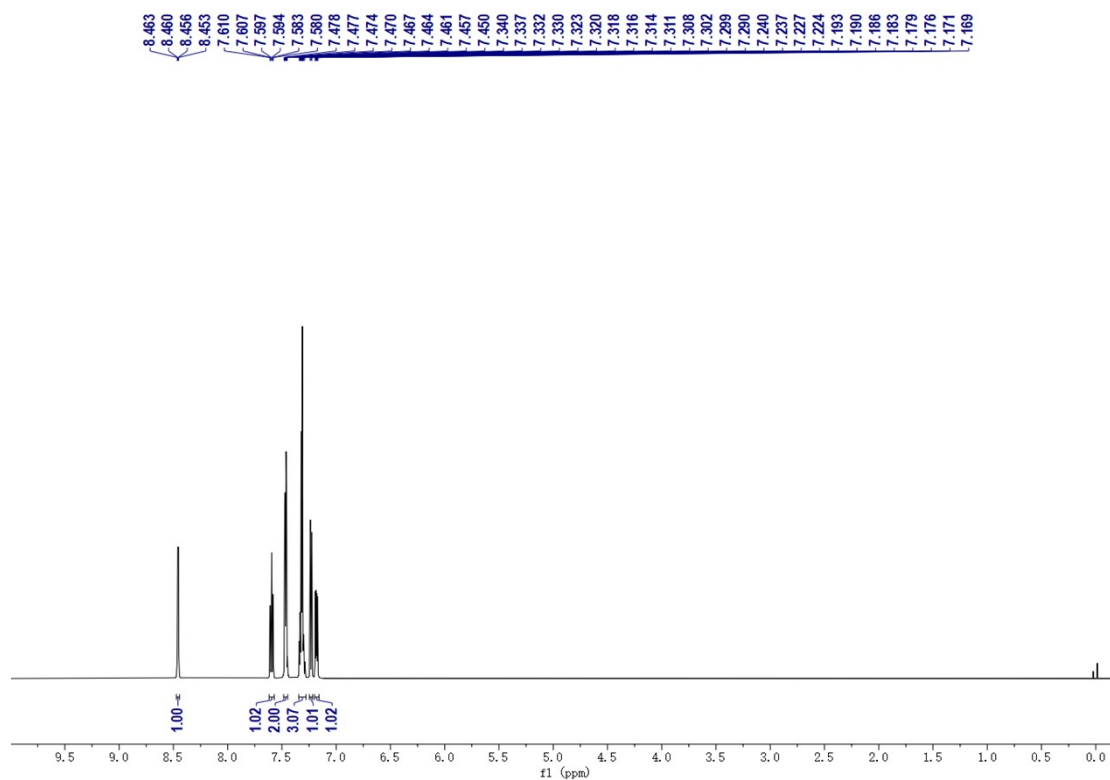

### 3ar- $^1\text{H}$ NMR

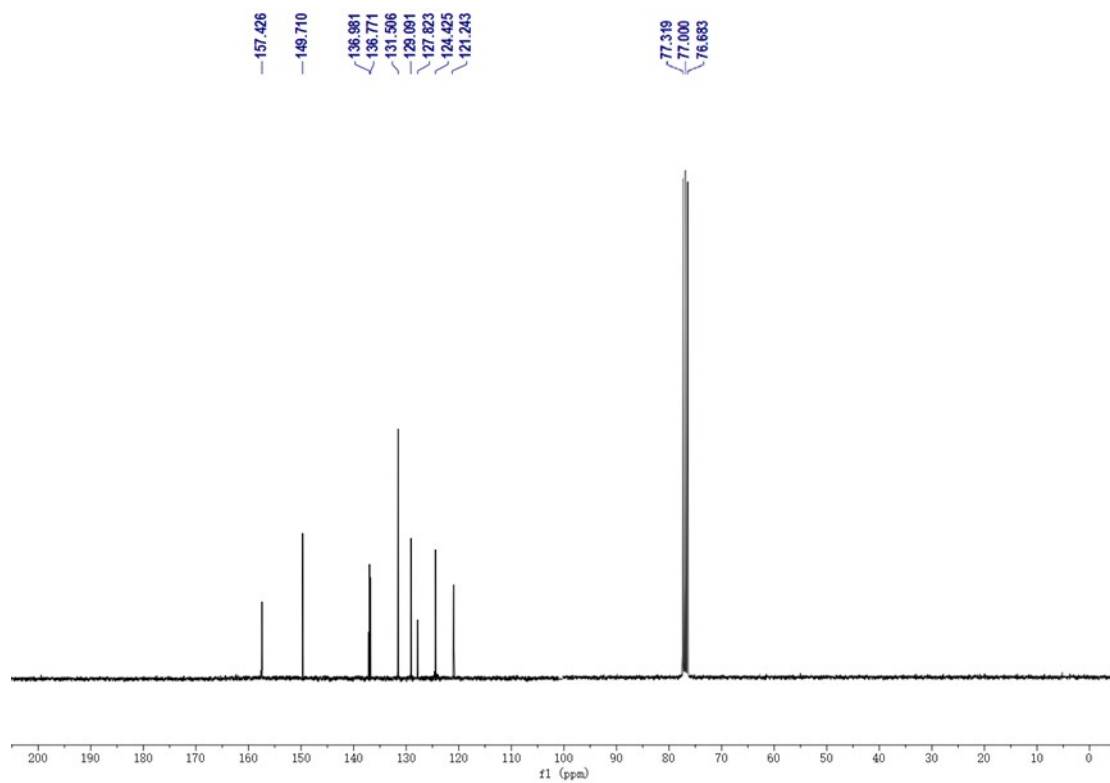

### 3ar- $^{13}\text{C}$ NMR

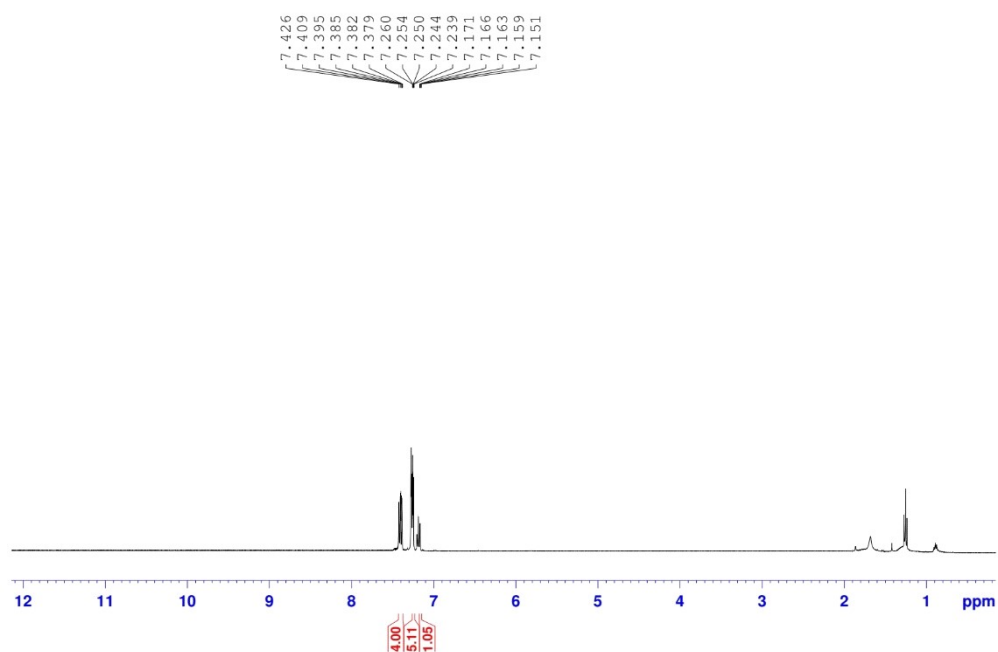

### 3as-<sup>1</sup>H NMR

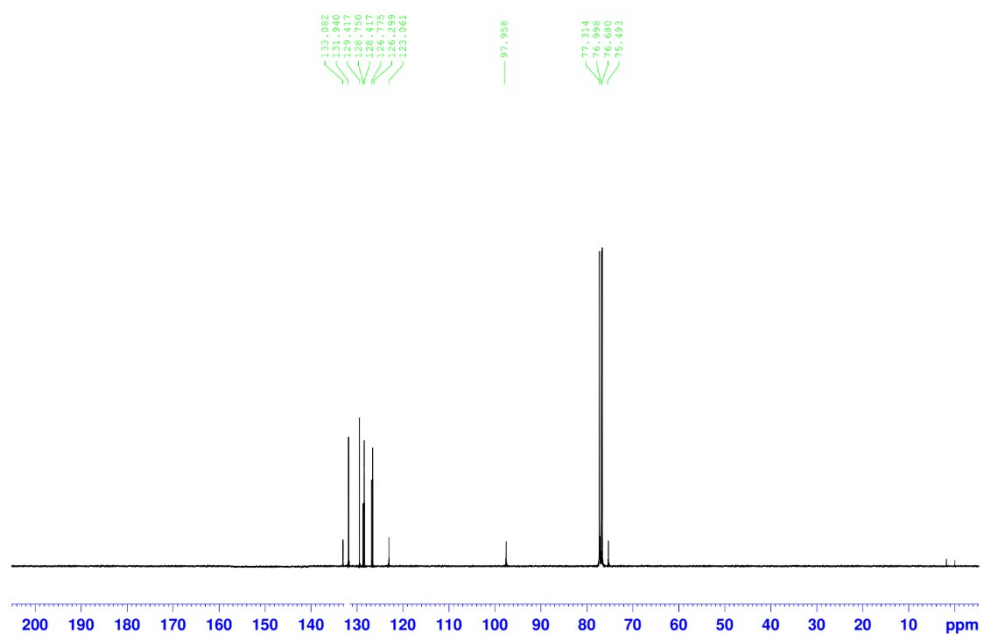

### 3as-<sup>13</sup>C NMR

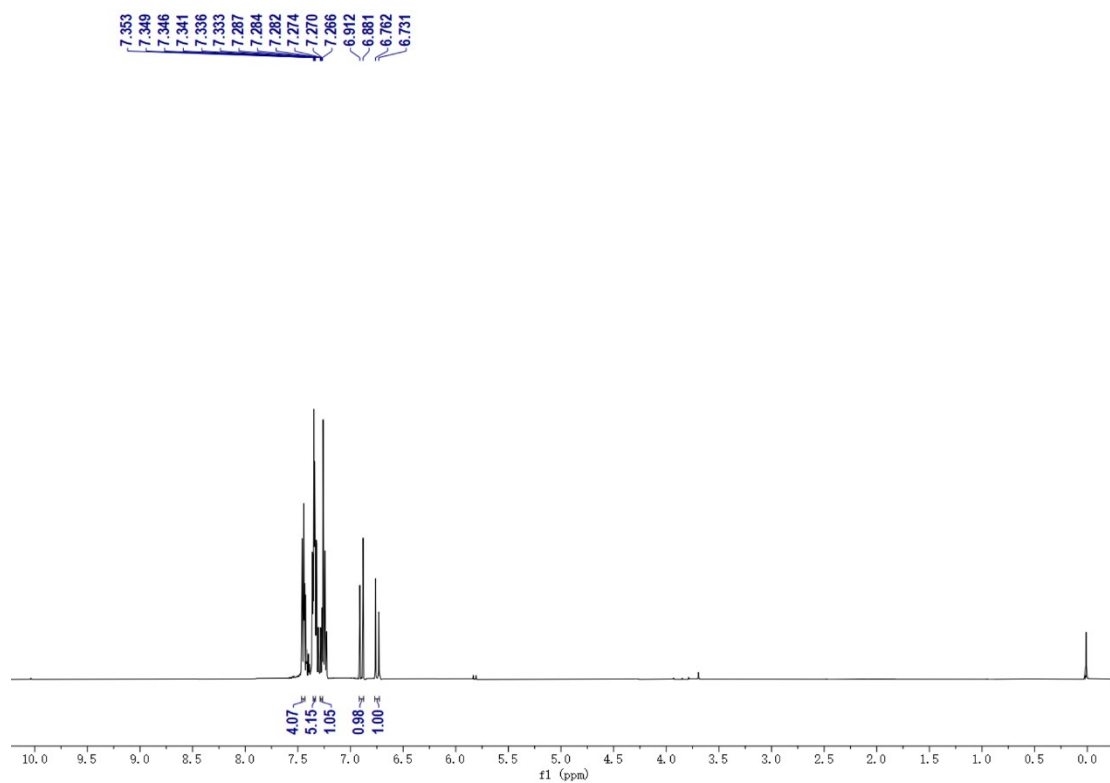

**3at-<sup>1</sup>H NMR**

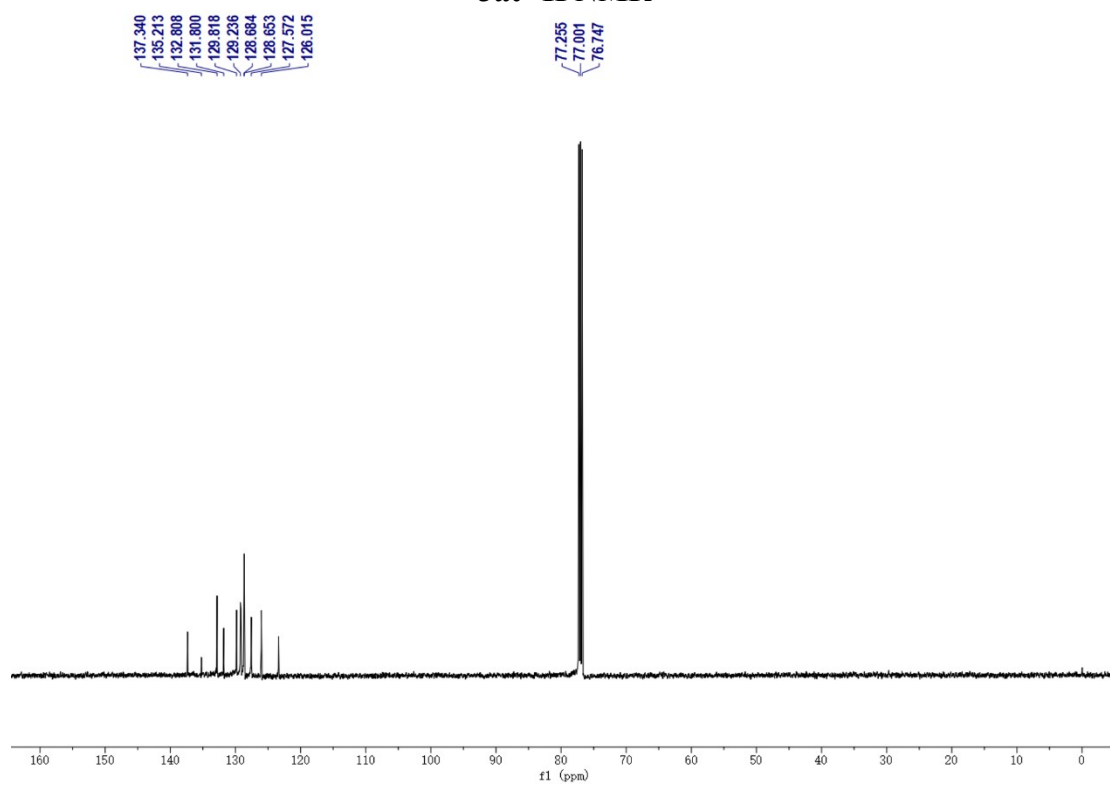

**3at-<sup>13</sup>C NMR**

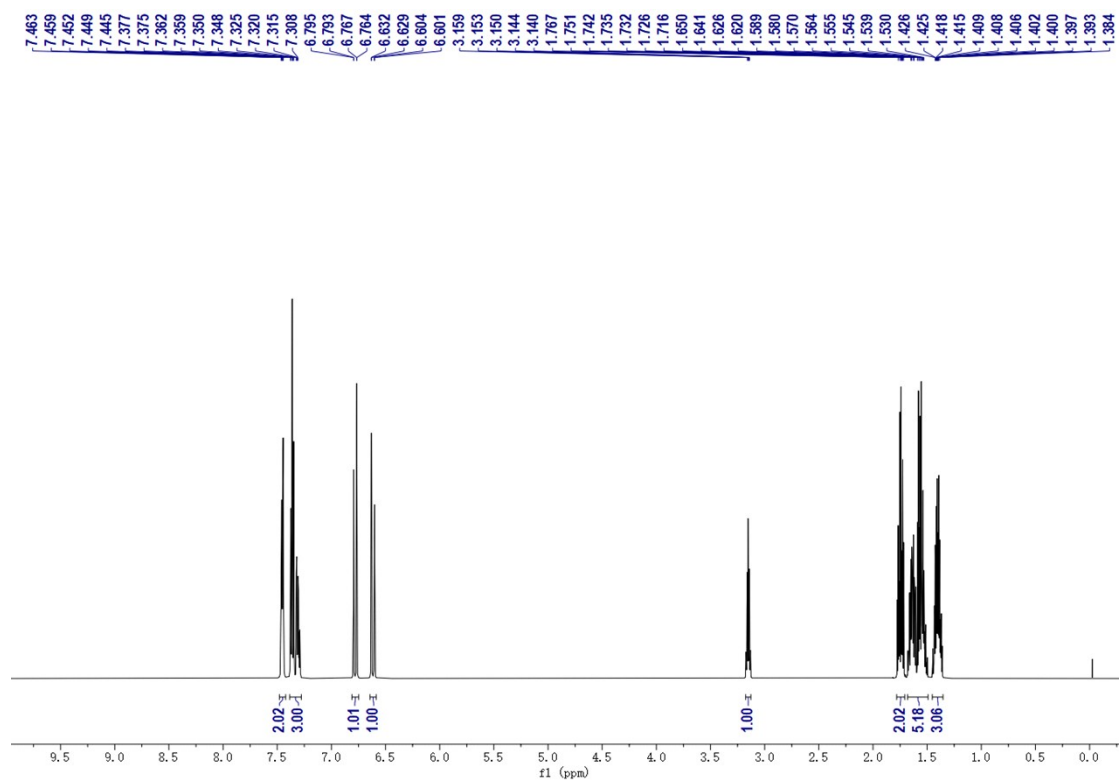

### $^1\text{H}$ NMR

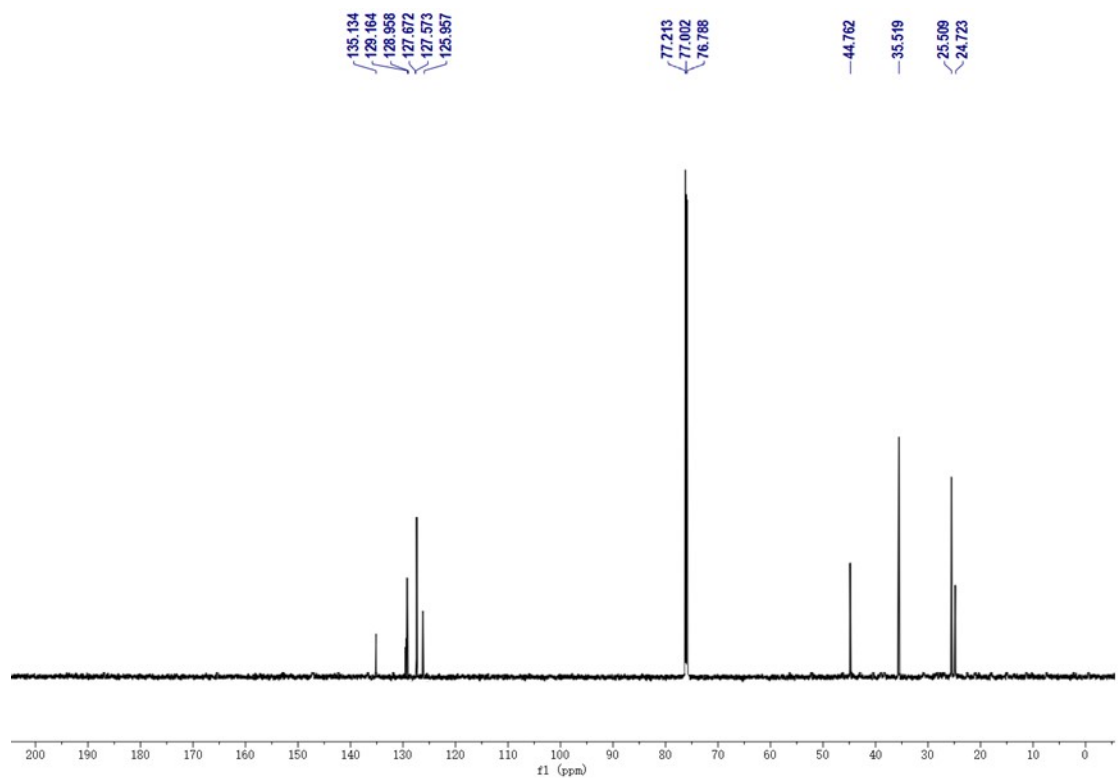

### $^{13}\text{C}$ NMR



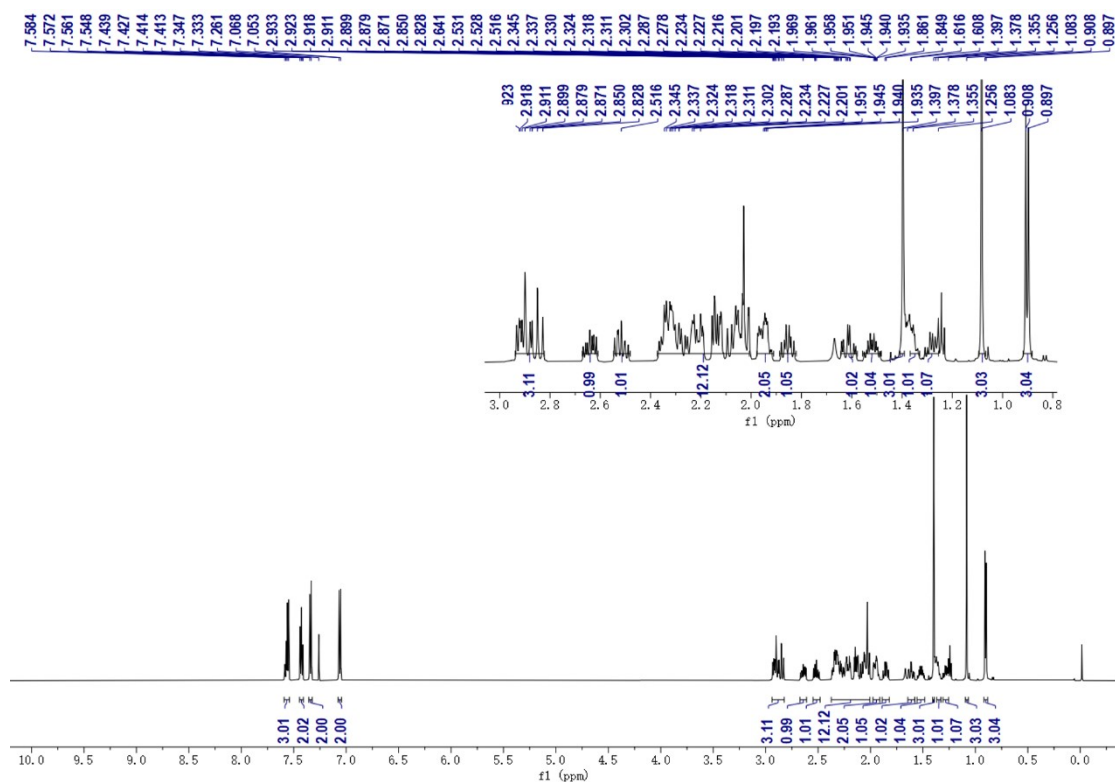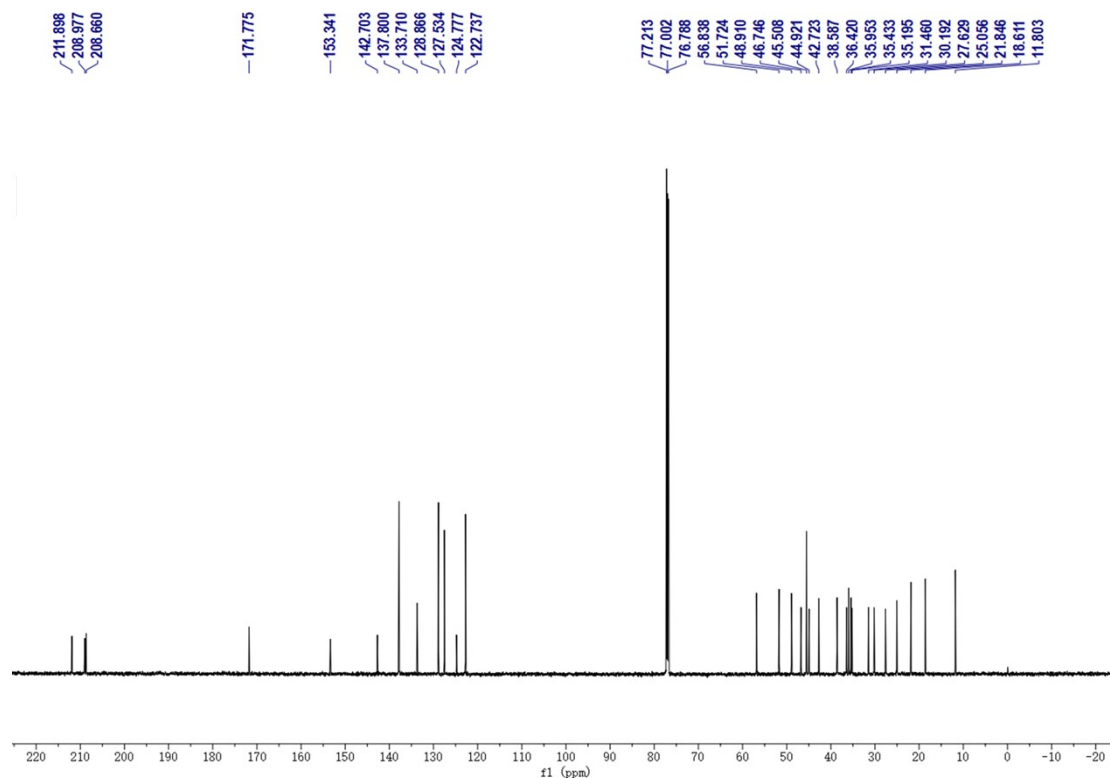

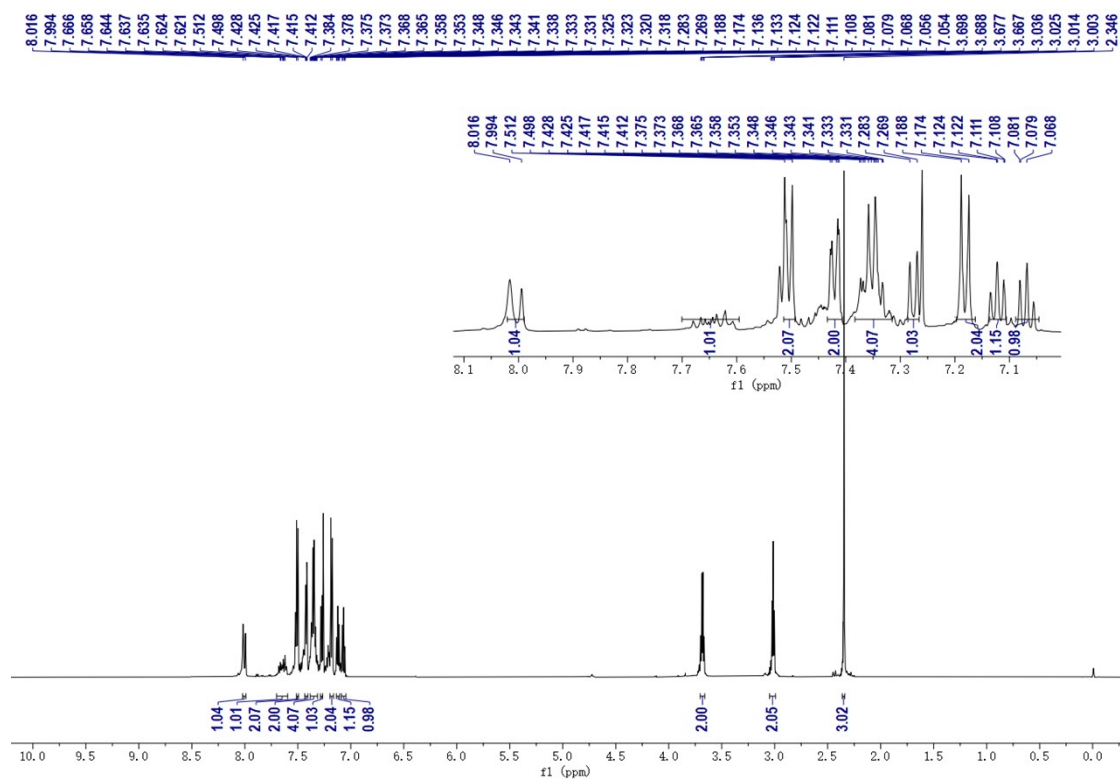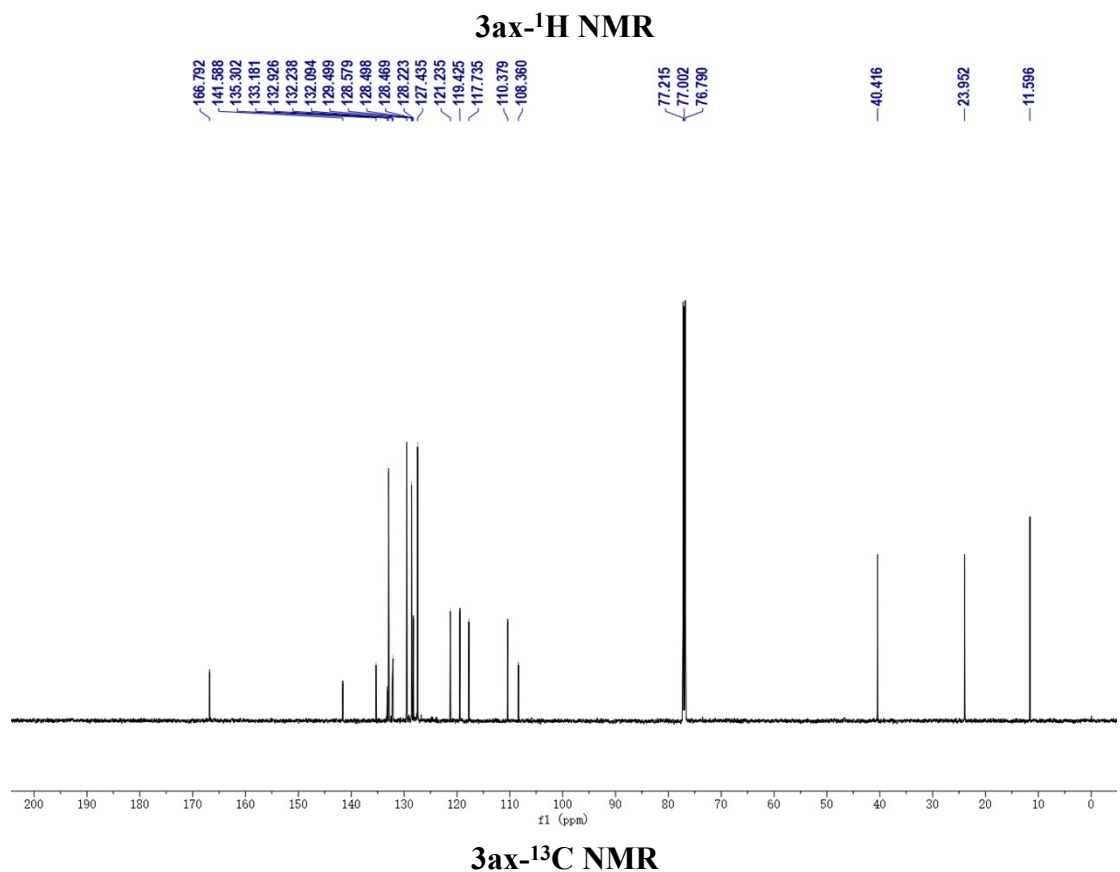

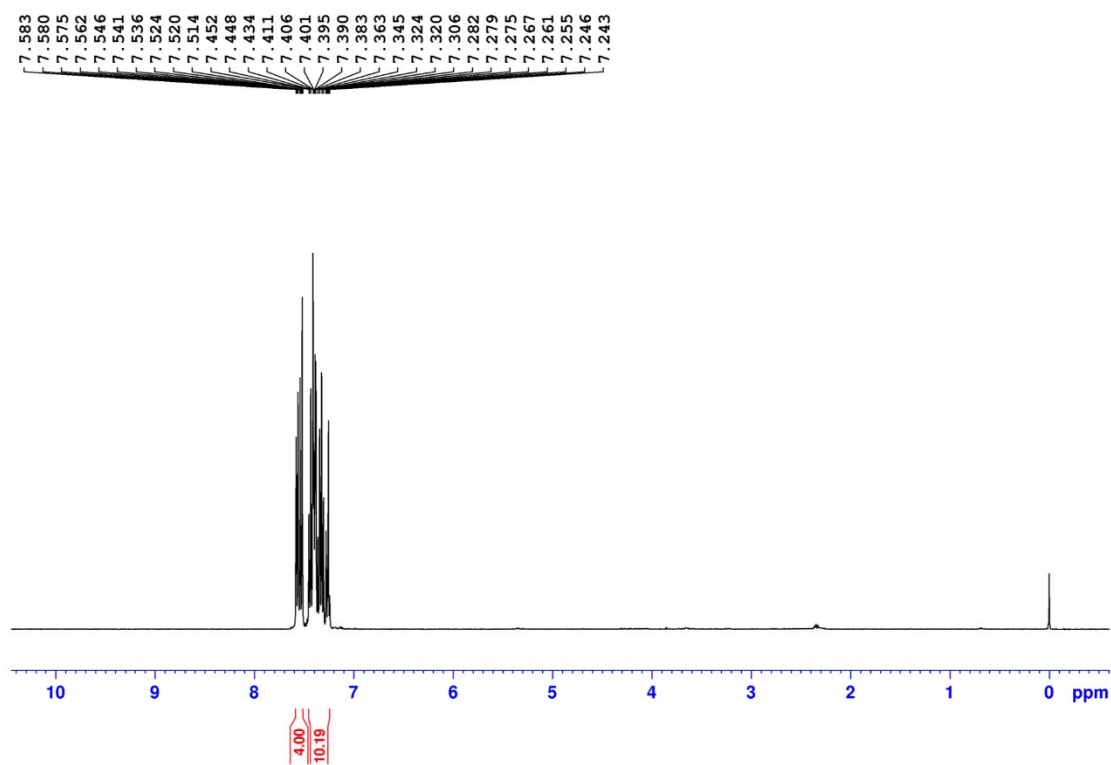

**3ba-<sup>1</sup>H NMR**

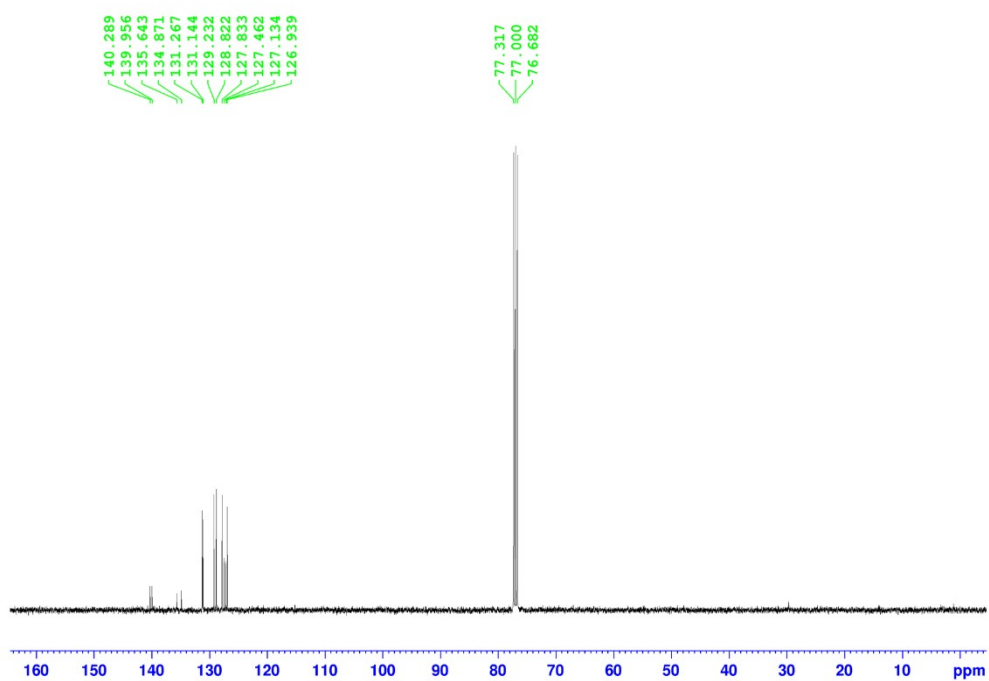

**3ba-<sup>13</sup>C NMR**

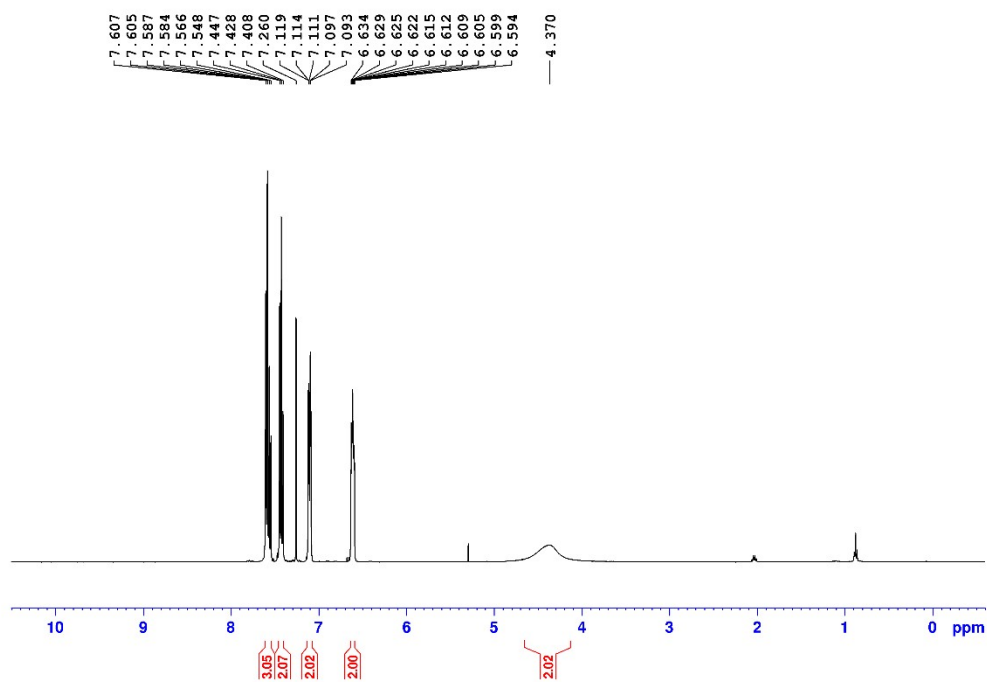

**3ca-<sup>1</sup>H NMR**

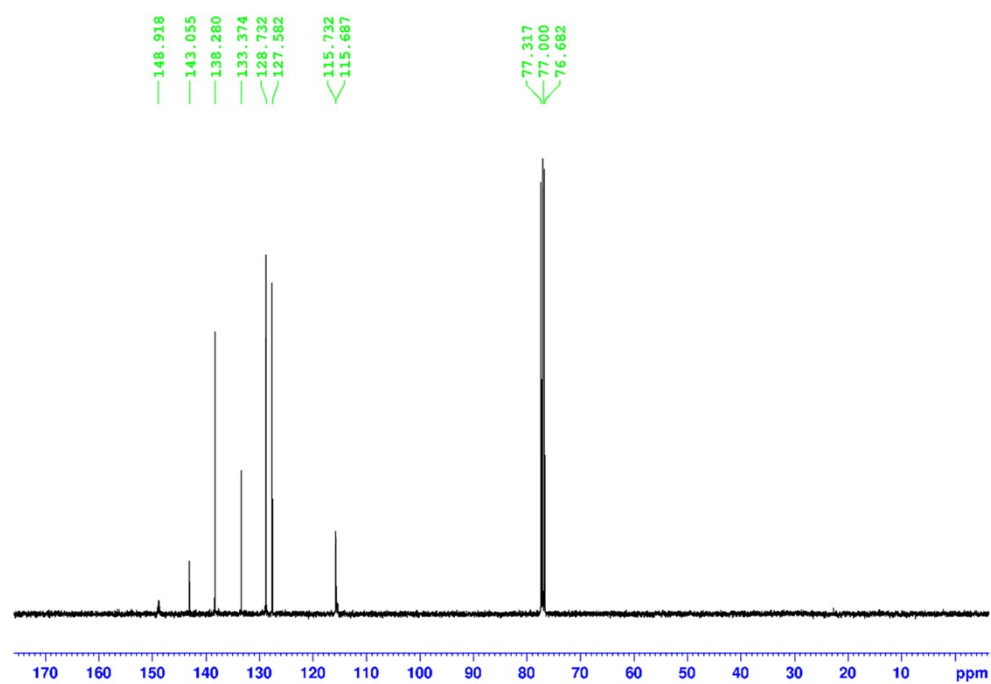

**3ca-<sup>13</sup>C NMR**

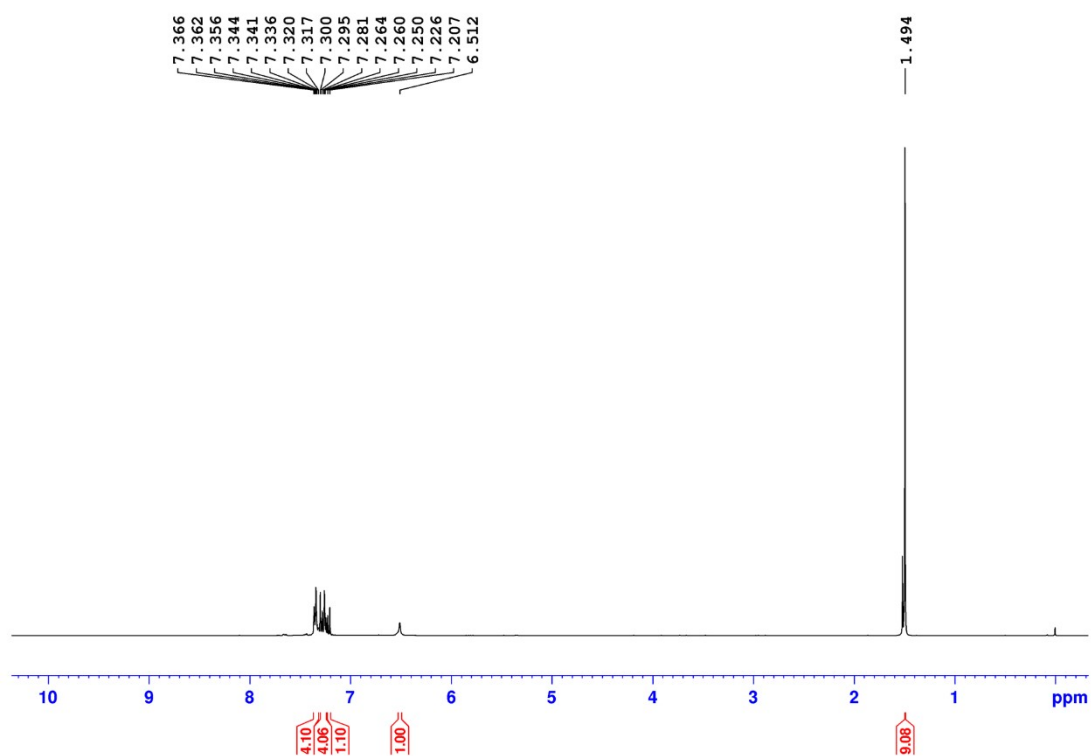

**3da-<sup>1</sup>H NMR**

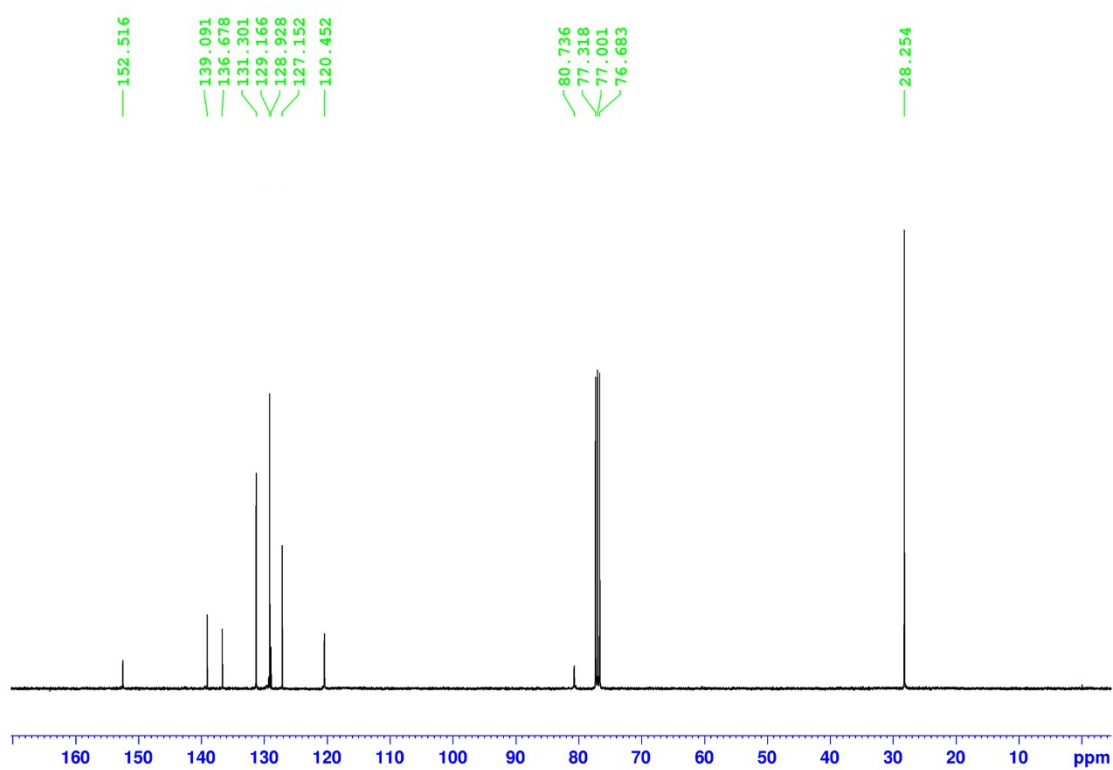

**3da-<sup>13</sup>C NMR**

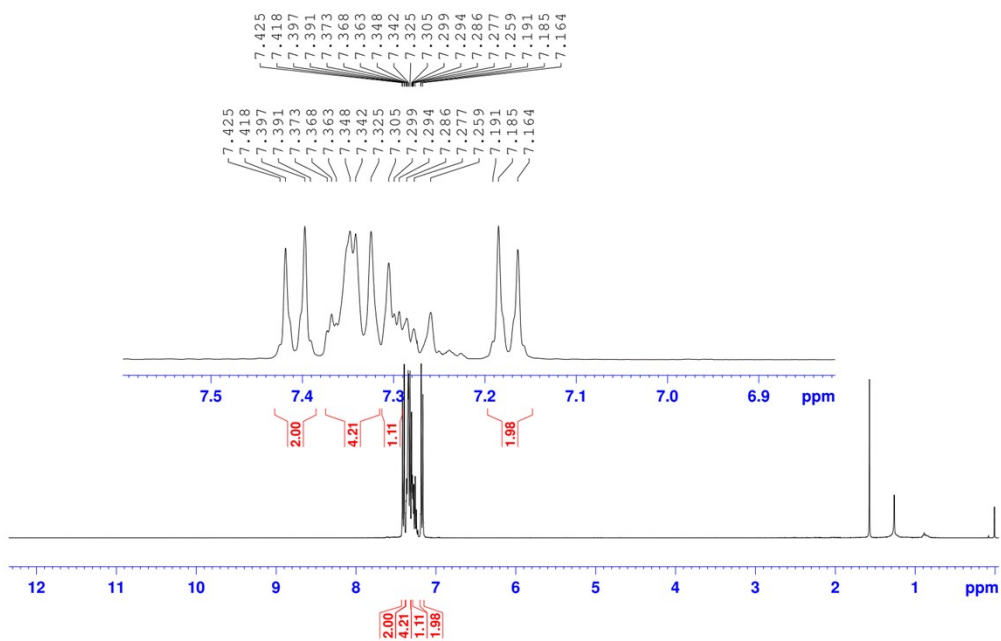

**3ea-<sup>1</sup>H NMR**

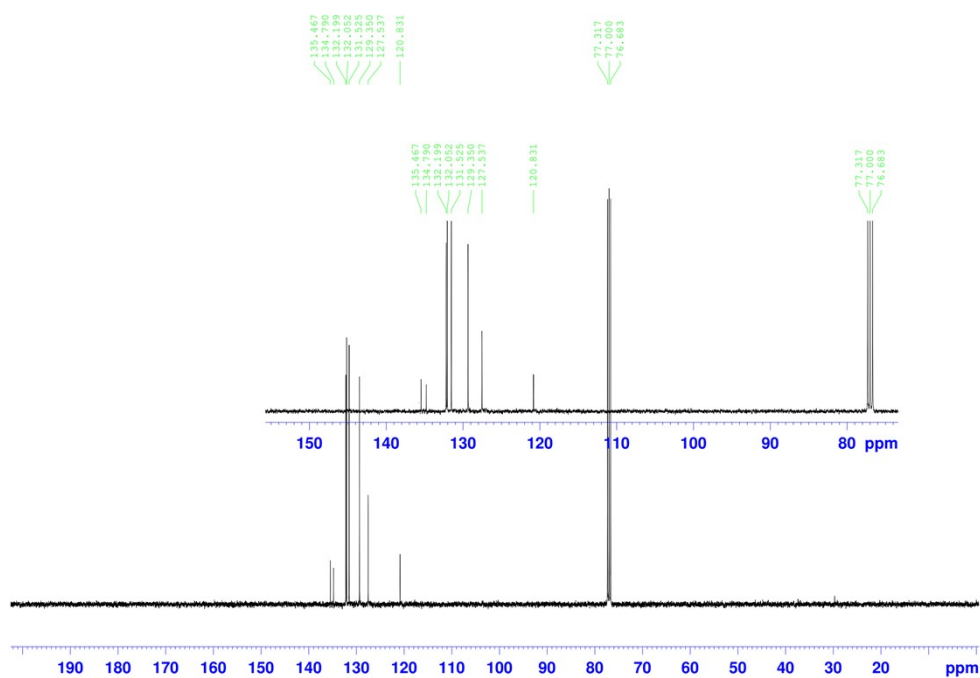

**3ea-<sup>13</sup>C NMR**

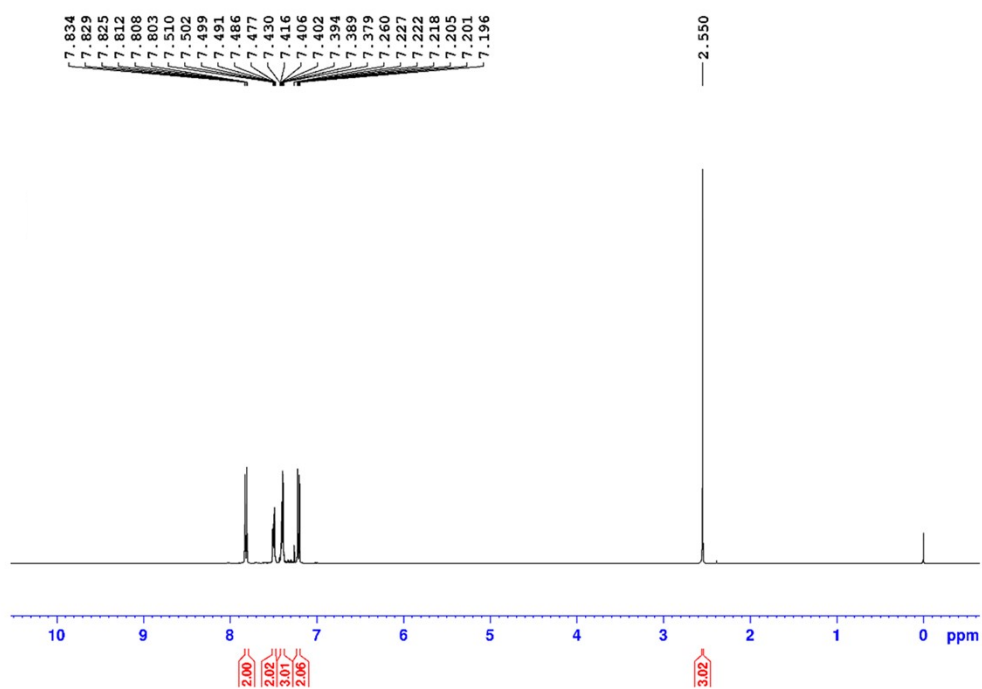

### 3fa-<sup>1</sup>H NMR

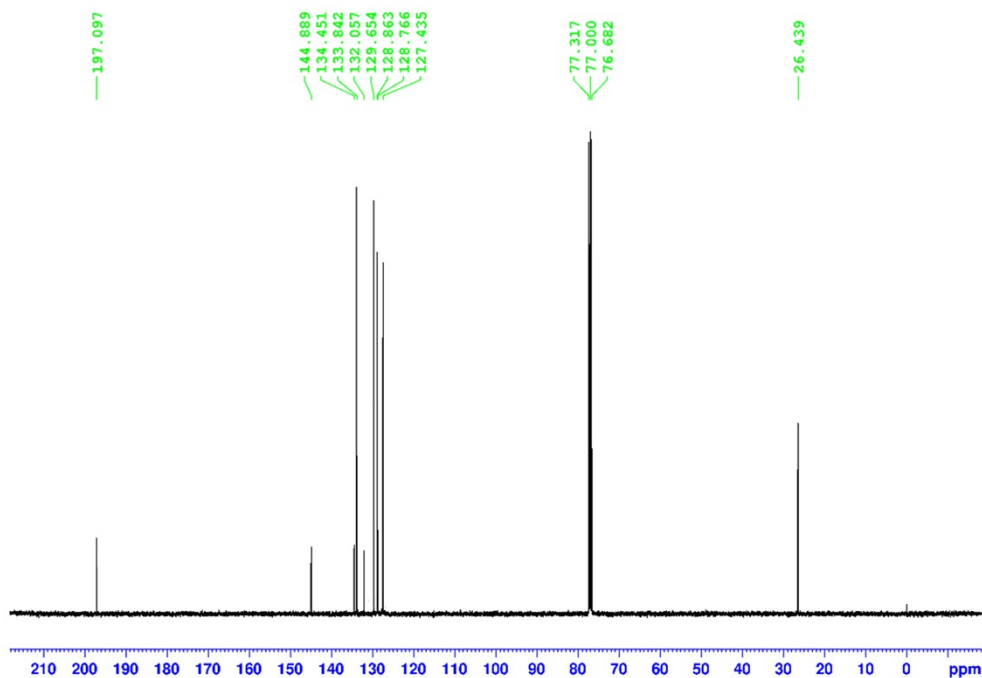

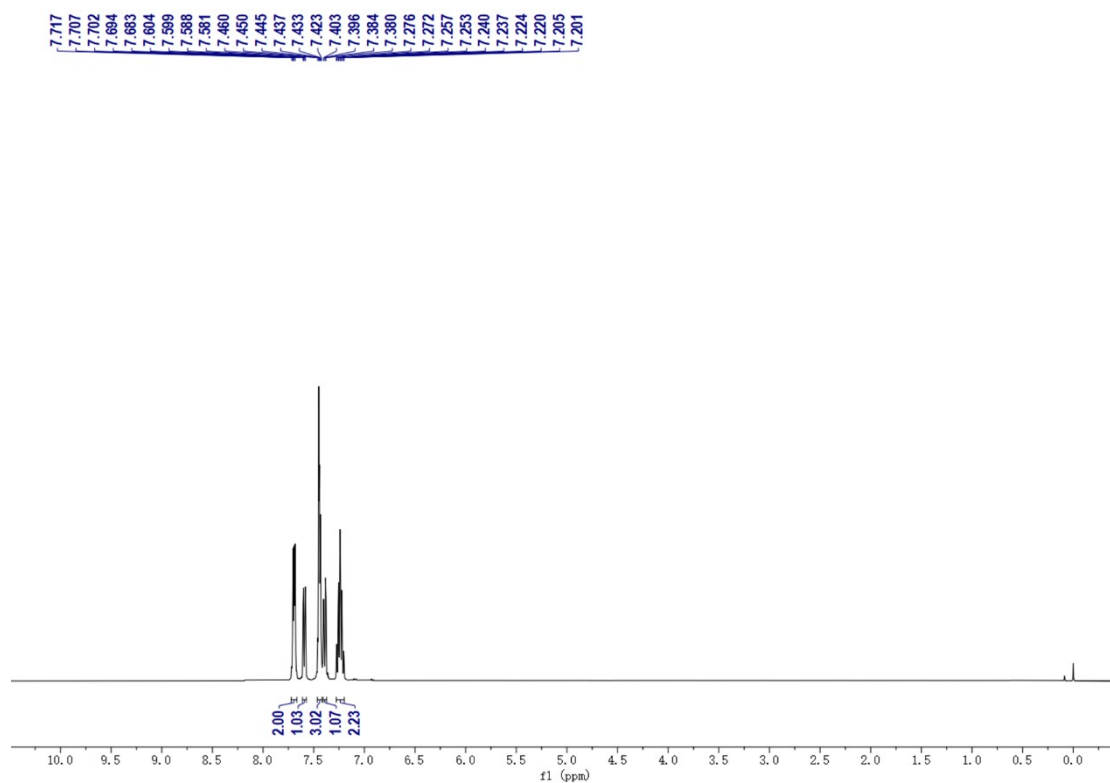

### 3ga-<sup>1</sup>H NMR

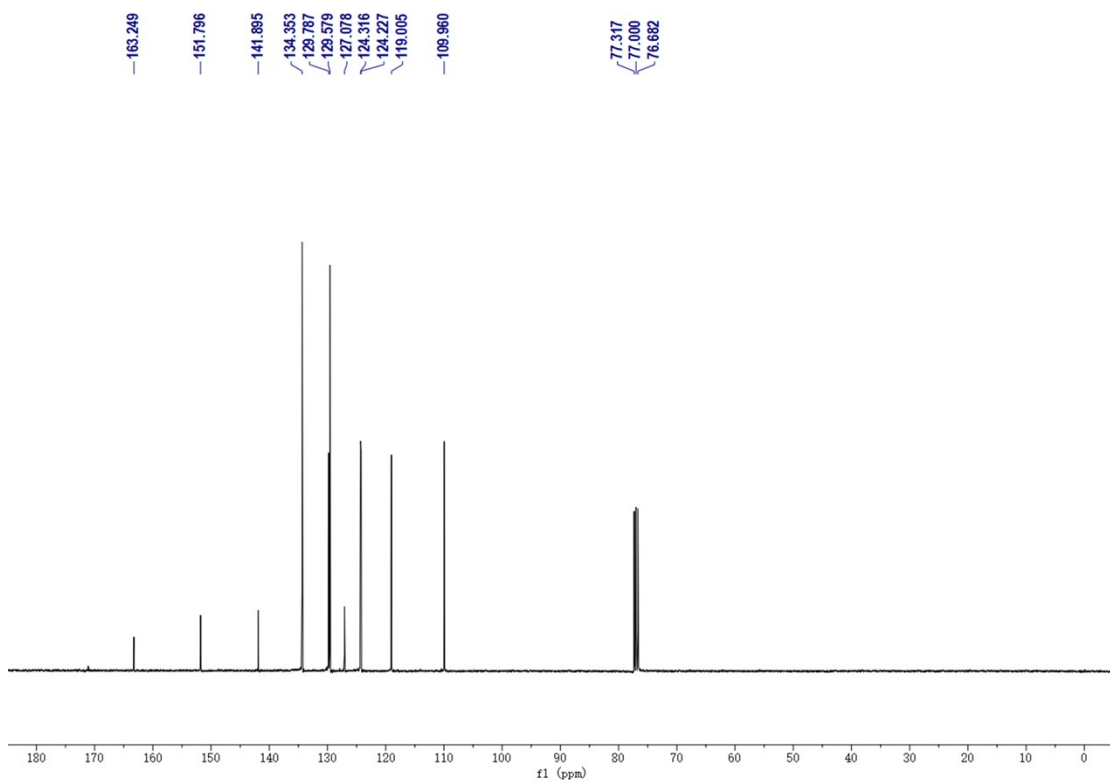

### 3ga-<sup>13</sup>C NMR



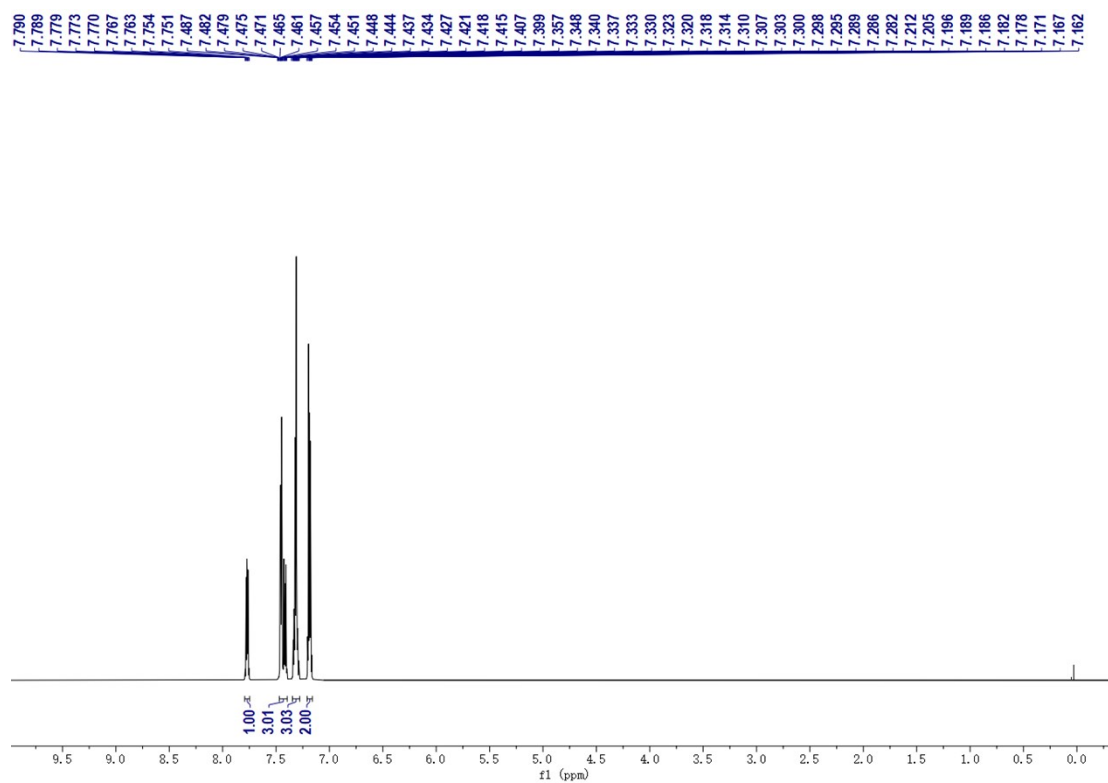

### 3ha-<sup>1</sup>H NMR

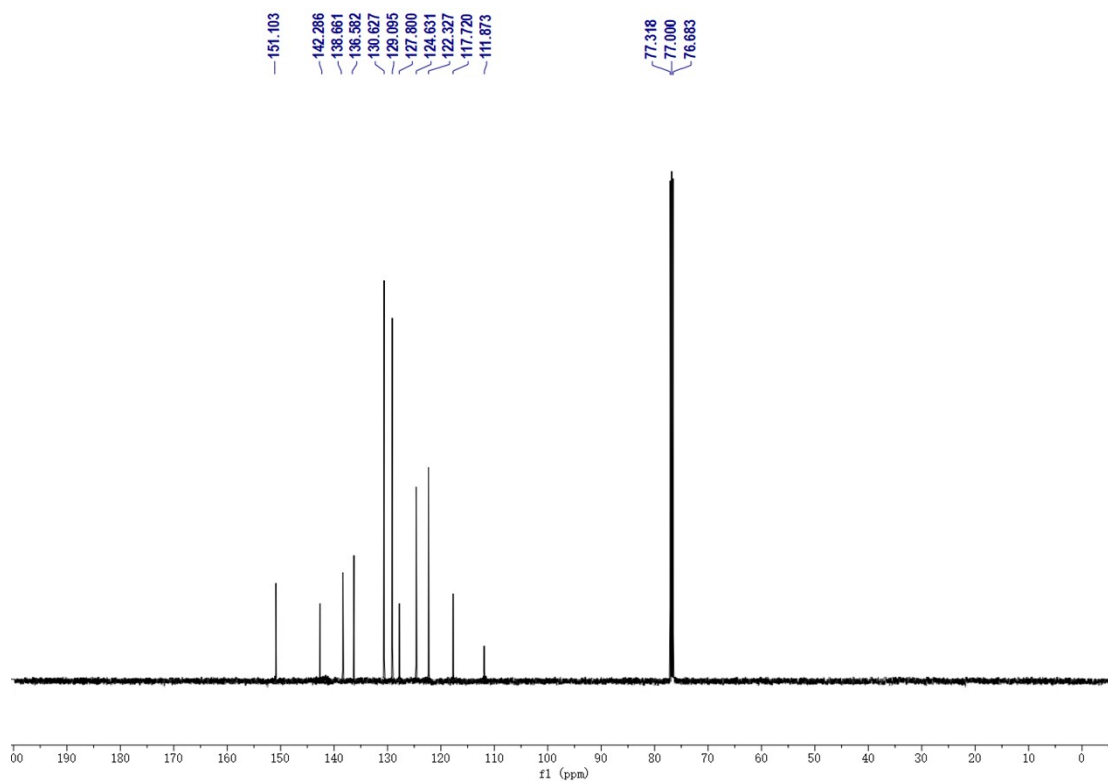

### 3ha-<sup>13</sup>C NMR

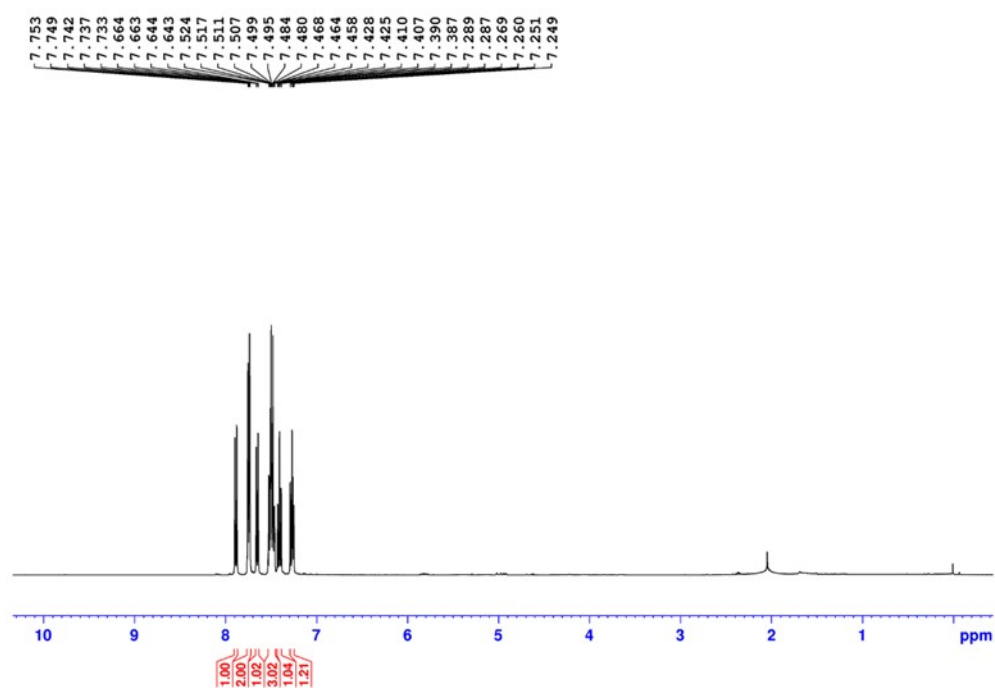

**3ia-<sup>1</sup>H NMR**

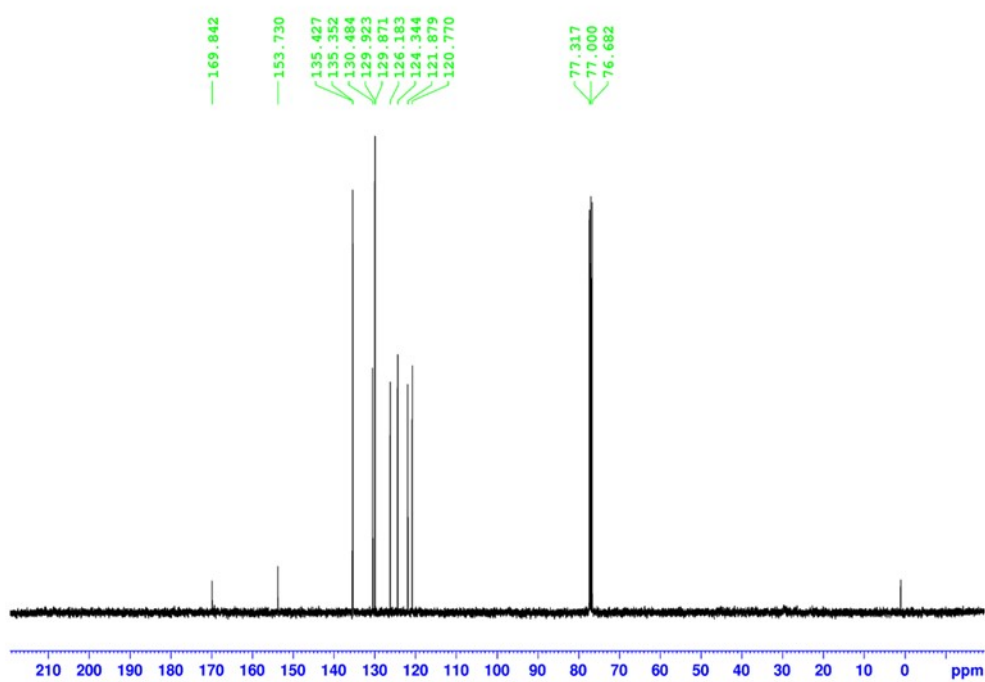

**3ia-<sup>13</sup>C NMR**

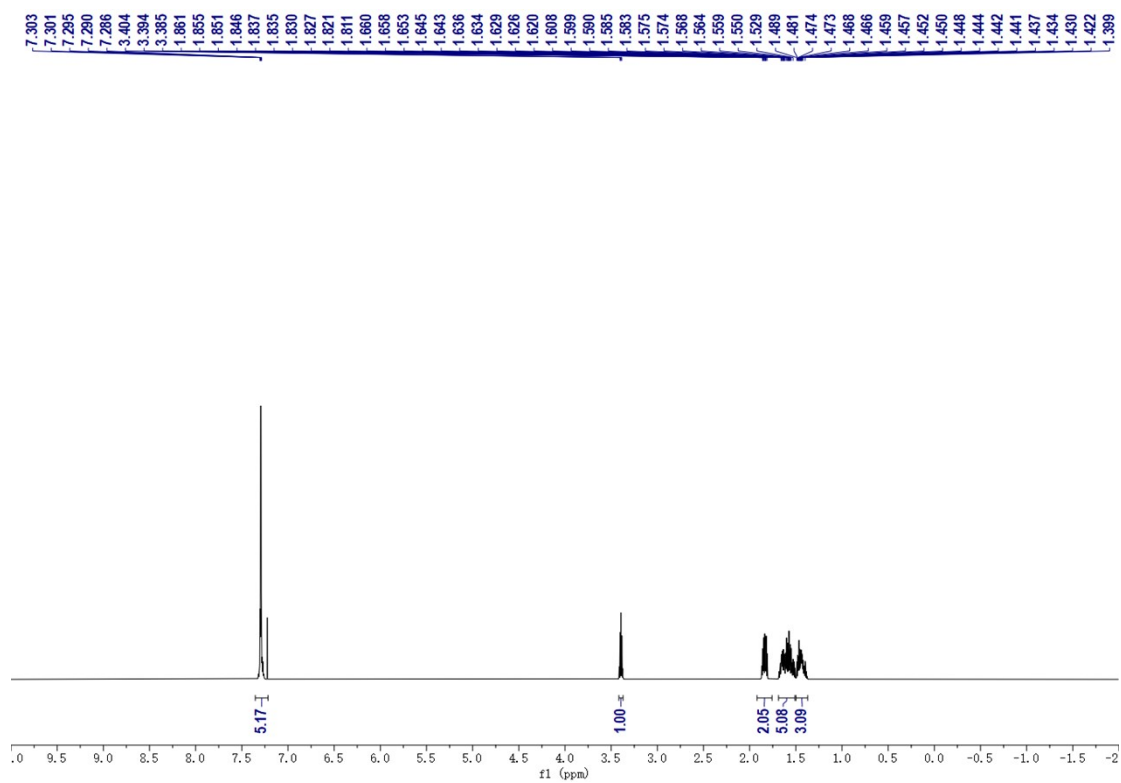

**3ja-<sup>1</sup>H NMR**

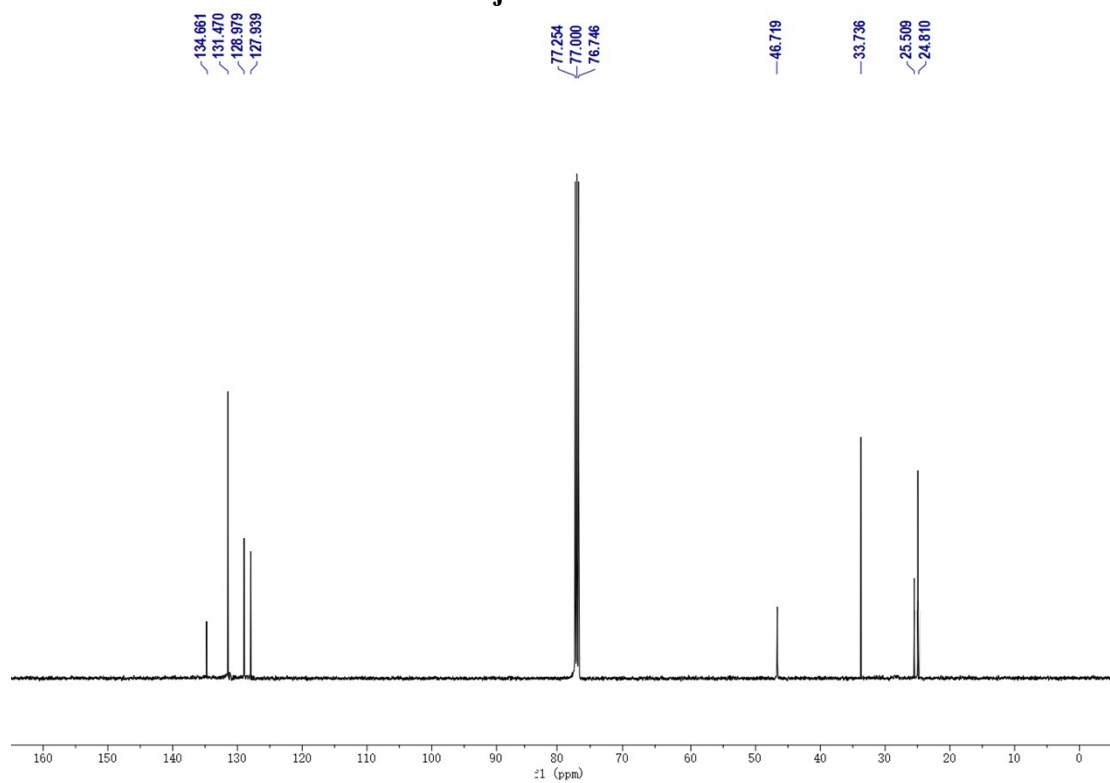

**3ja-<sup>13</sup>C NMR**

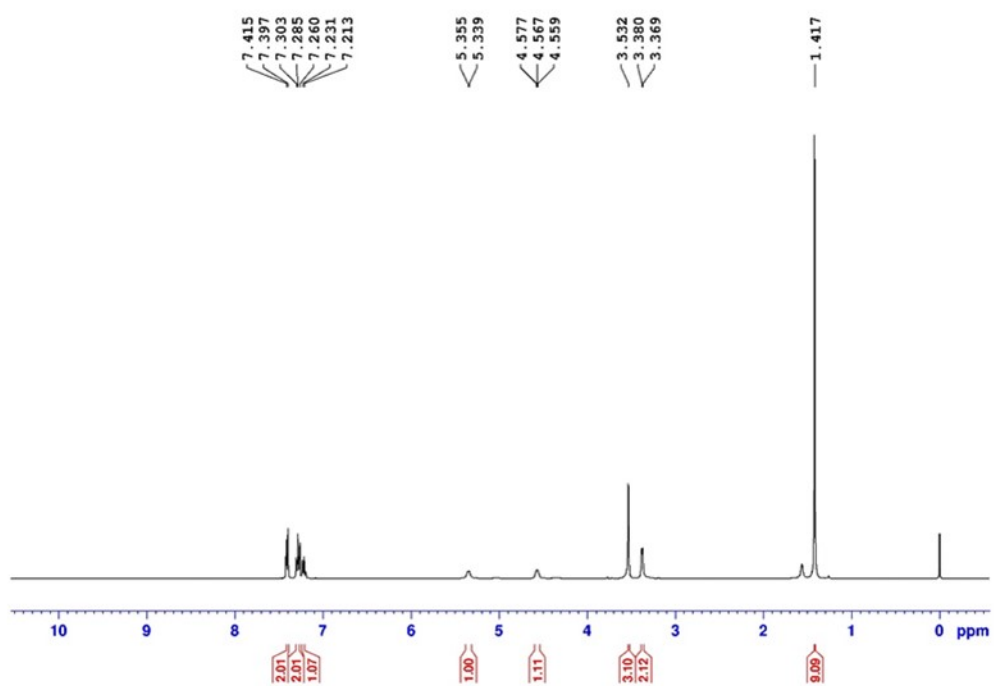

3ka-<sup>1</sup>H NMR

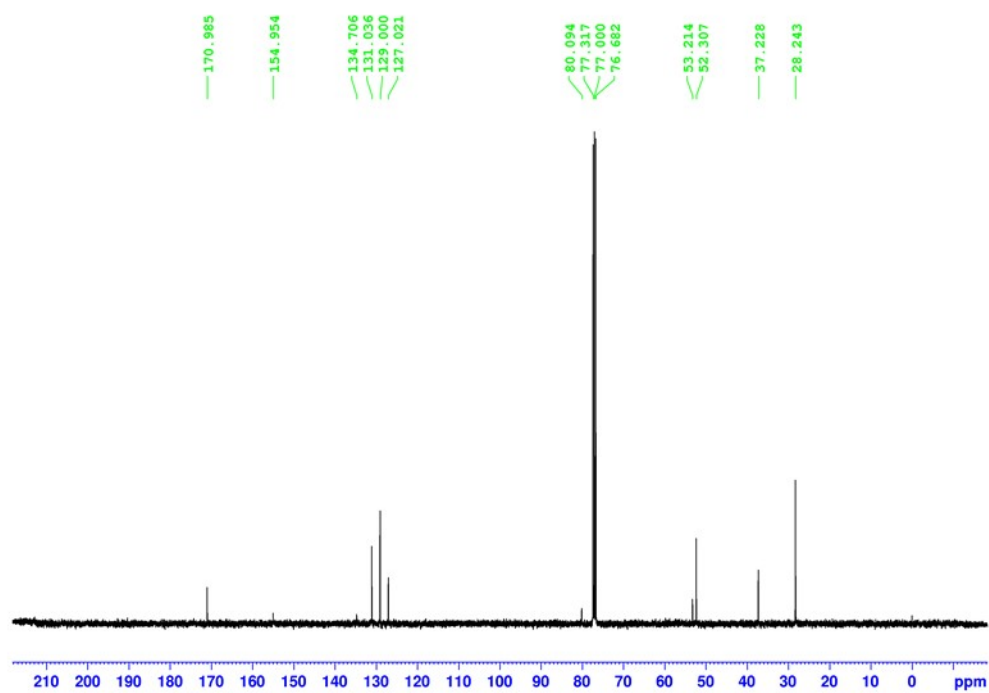

3ka-<sup>13</sup>C NMR

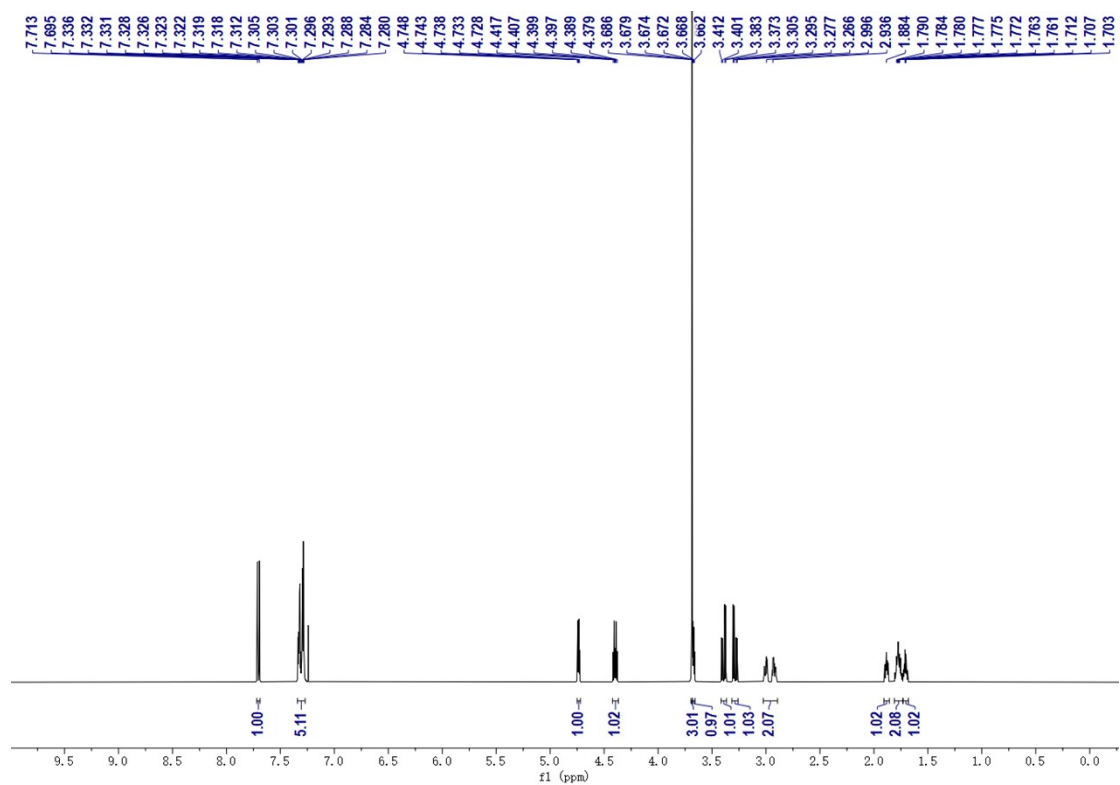

**3la-<sup>1</sup>H NMR**

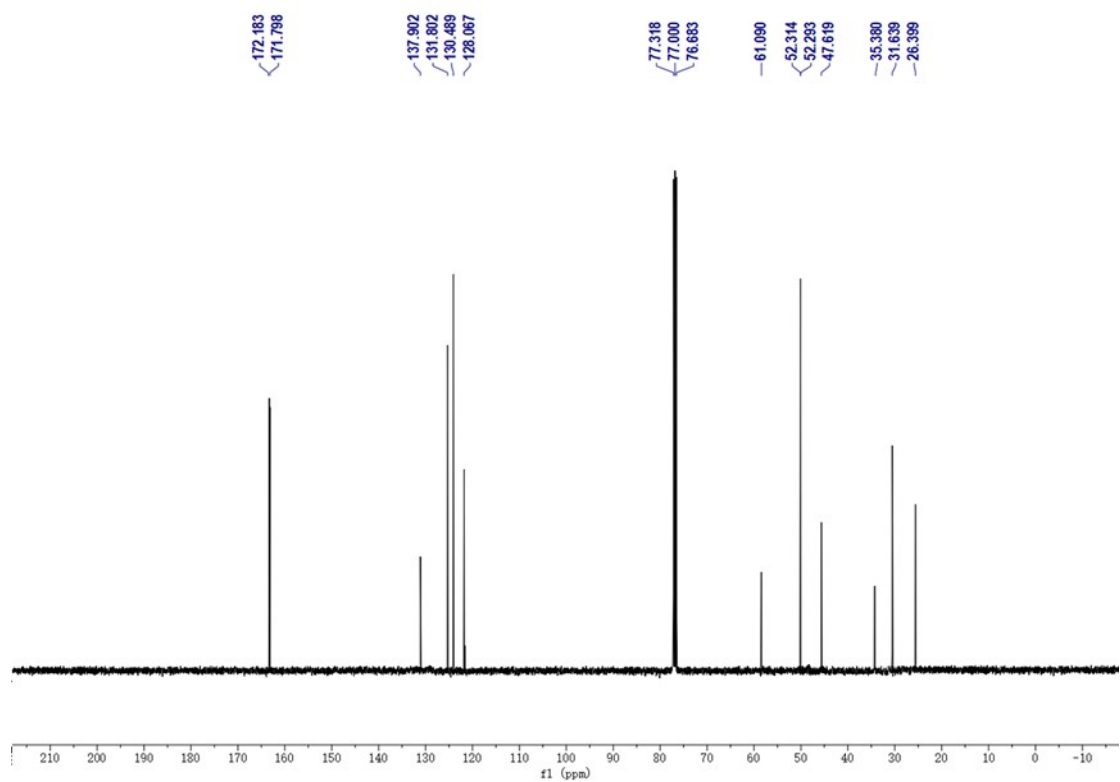

**3la-<sup>13</sup>C NMR**

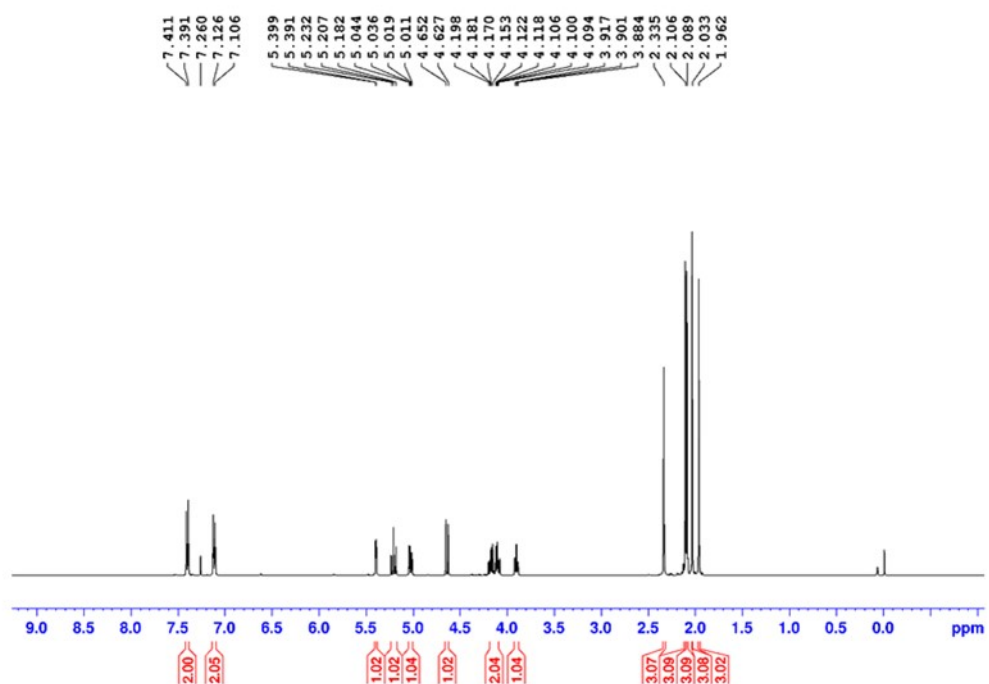

3ma-<sup>1</sup>H NMR

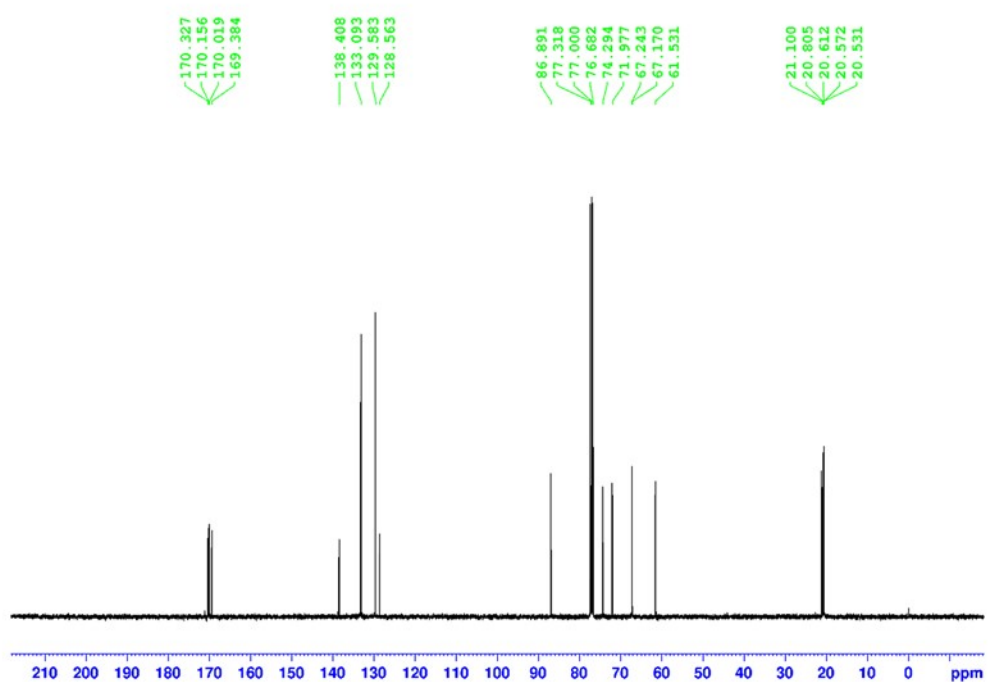

3ma-<sup>13</sup>C NMR

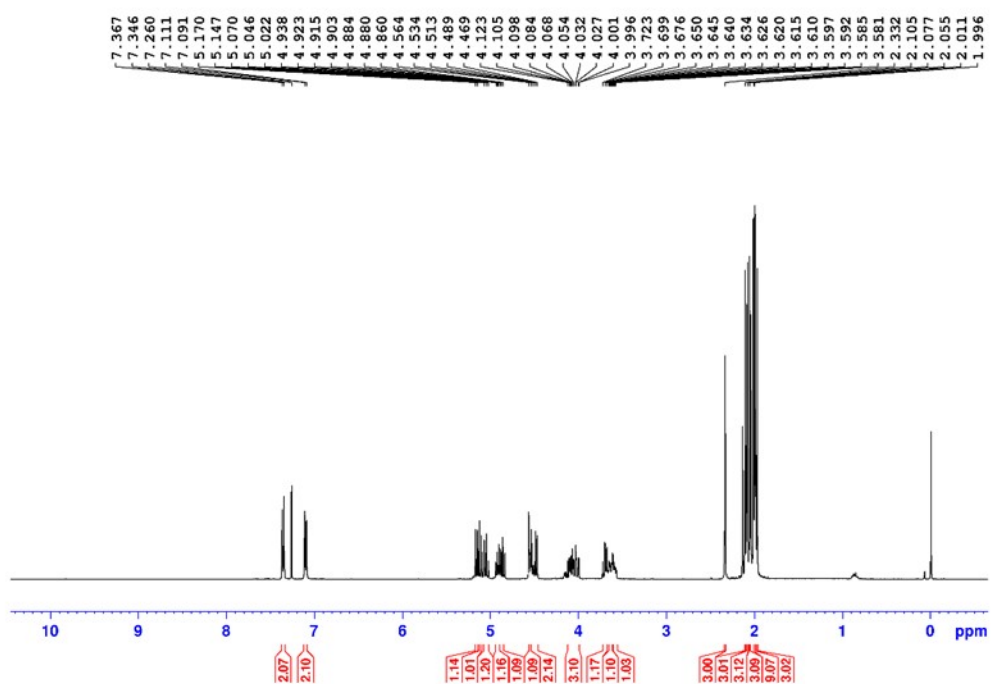

**3na-<sup>1</sup>H NMR**

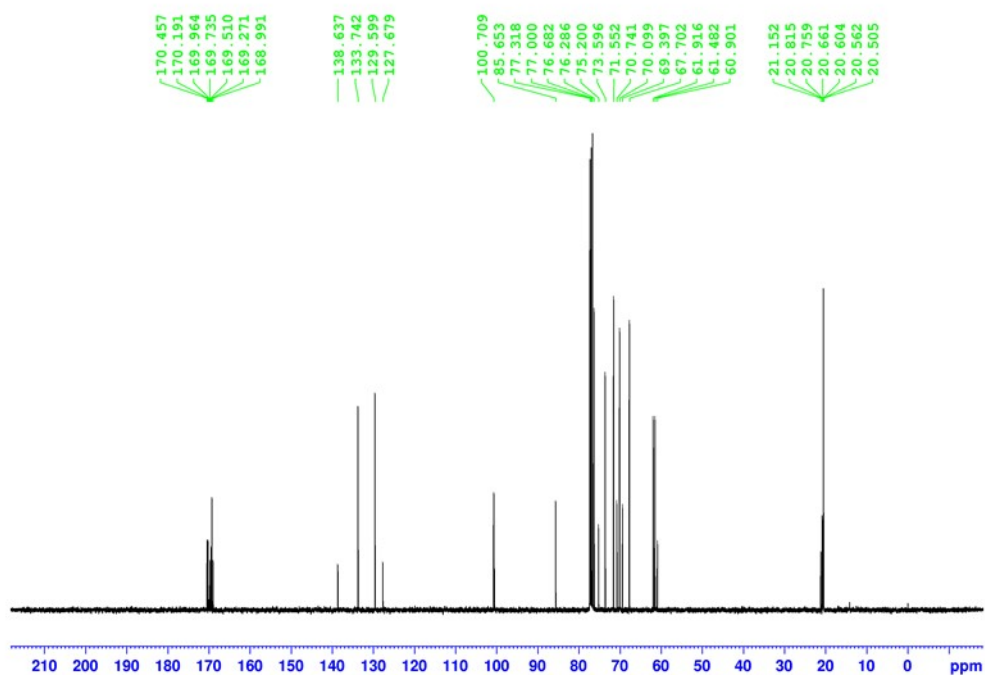

**3na-<sup>13</sup>C NMR**

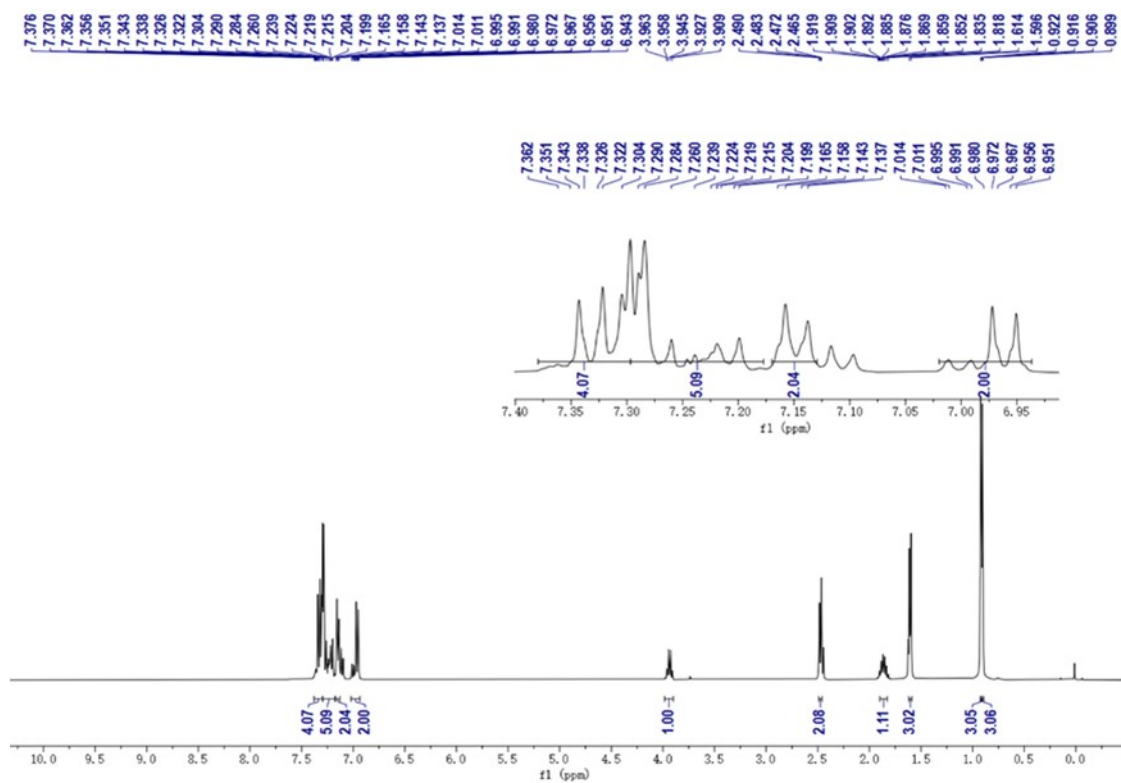

**30a-<sup>1</sup>H NMR**

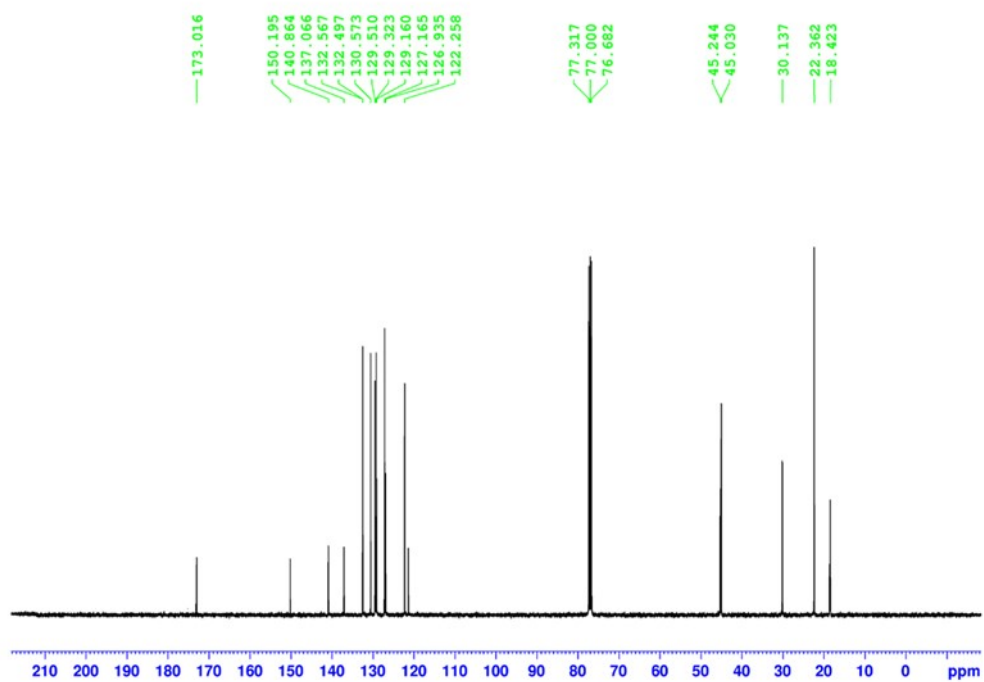

**30a-<sup>13</sup>C NMR**



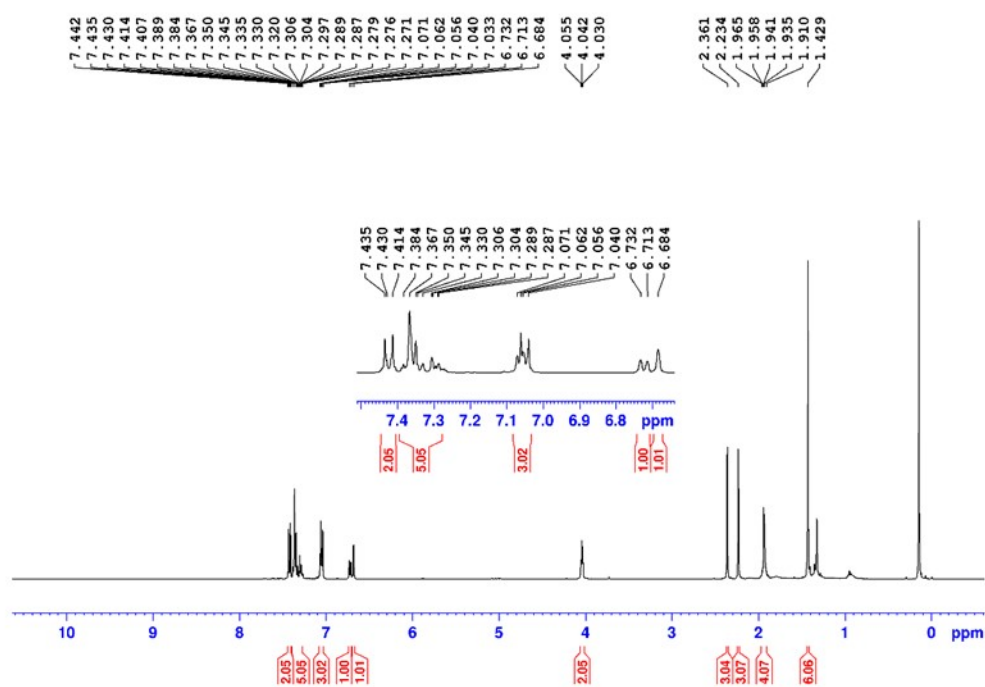

**3pa-<sup>1</sup>H NMR**

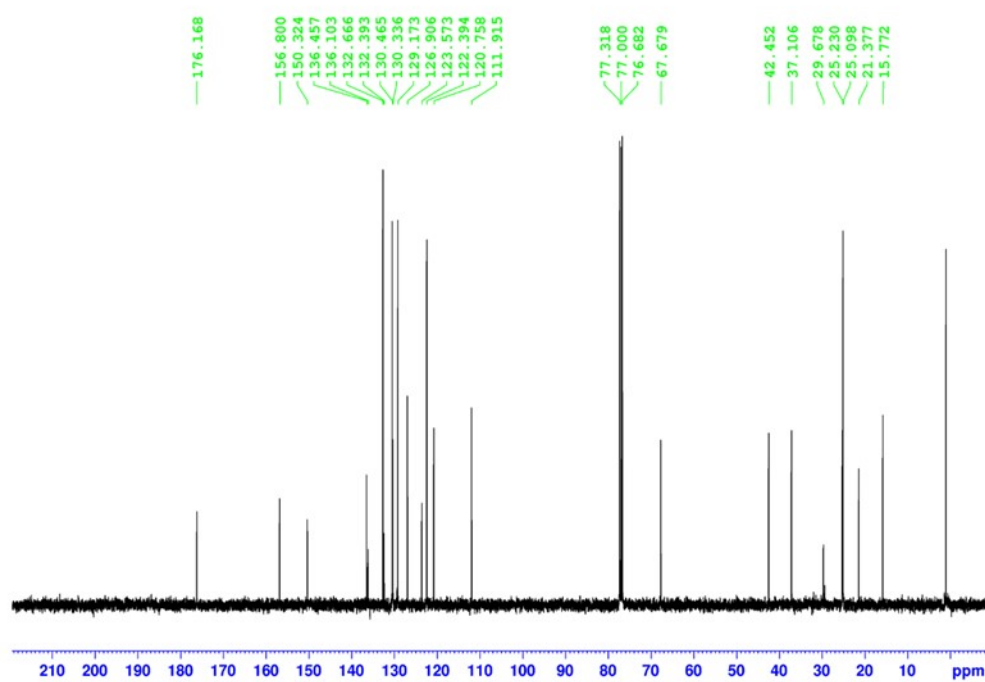

**3pa-<sup>13</sup>C NMR**
